# Supplementary material
Source: Research Square preprint supplement (doi:10.21203/rs.3.rs-9643518/v1)
Supplement: Supplementary file 1 [file 2b8737a019728ce0d0f6586a.docx]

**Supplemental Information**

**Revisit the comparison between antagonist and agonist protocols for ovarian stimulation in ART treatment: a causal forest approach**


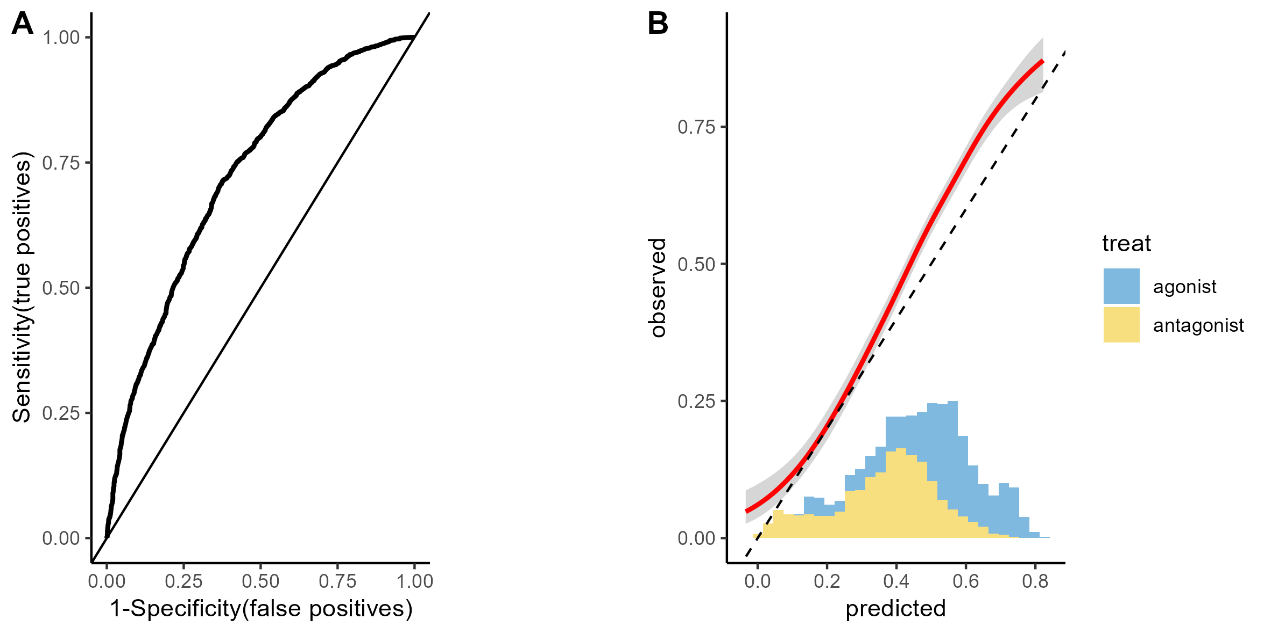


**Figure S1** **Performance of the causal forest model. (A)** The ROC curve of the causal forest model. **(B)** The calibration curve of the causal forest model.


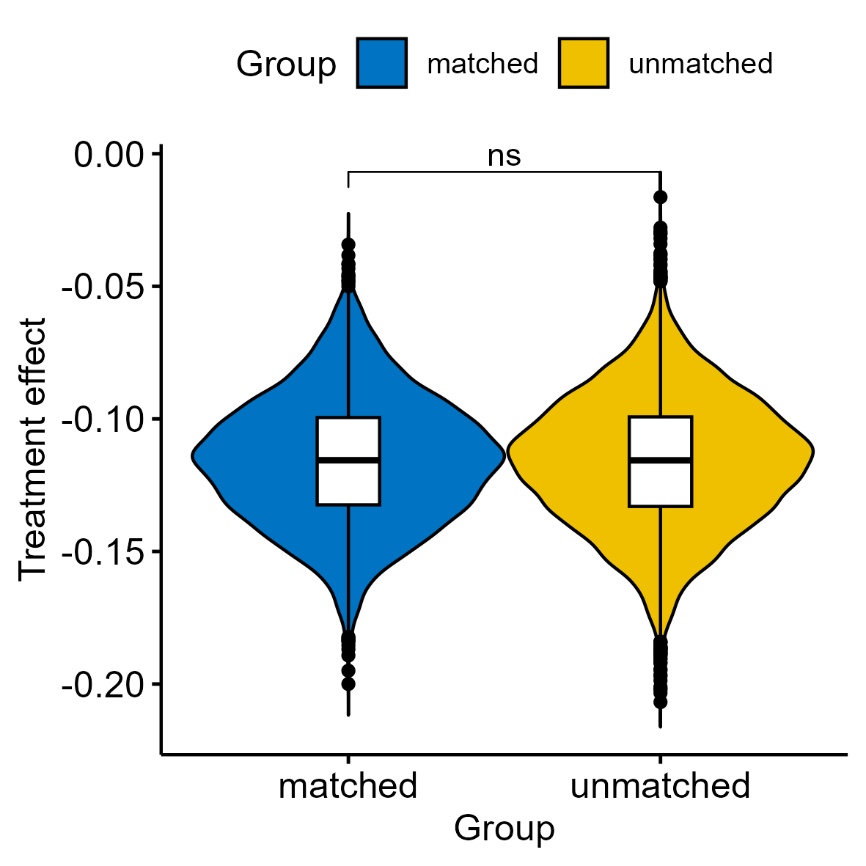


**Fig S2. The distribution of individual treatment effect (ITE) between agonist and antagonist protocols in matched and unmatched groups.**


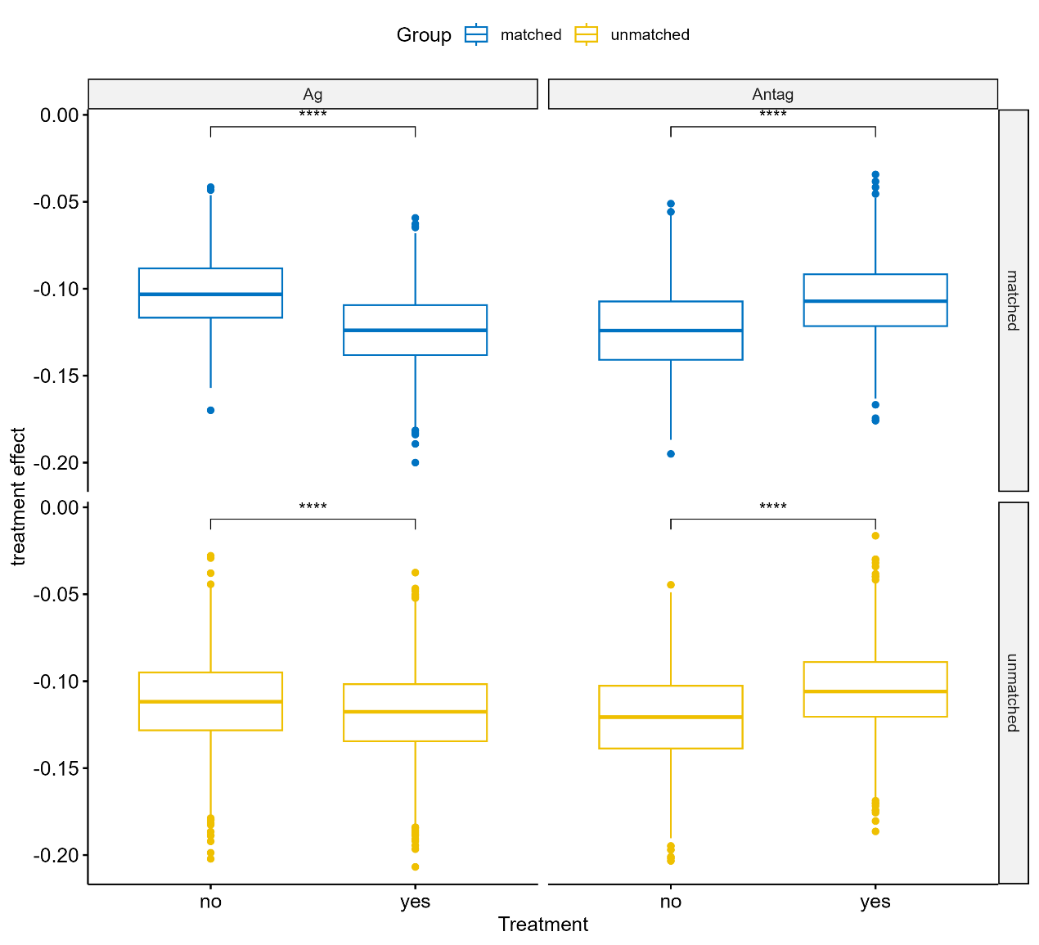


**Fig S3 The association between ITE and treatment effect in agonist and antagonist protocol groups before and after PS matching.**


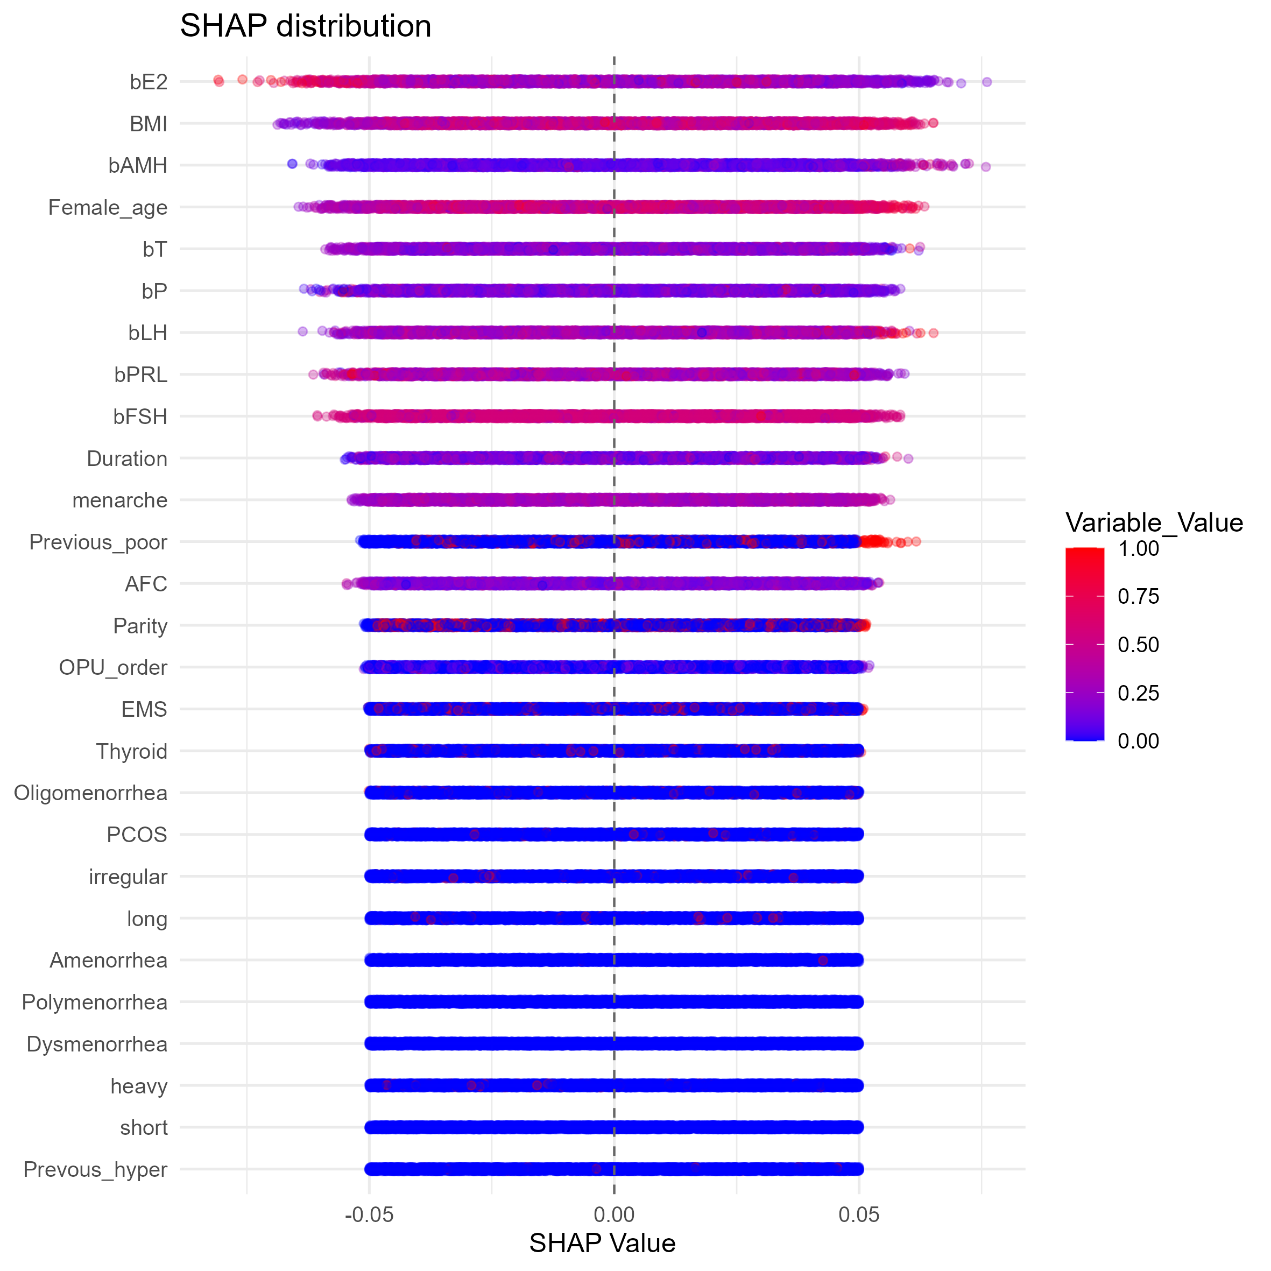


**Fig S4. The distribution of the variable’s SHAP value.**

.

Reference:
1. Melo, P., et al., Controlled ovarian stimulation protocols for assisted reproduction: a network meta-analysis. Cochrane Database Syst Rev, 2025. 7(7): p. CD012586.

1. Melo, P., et al., Controlled ovarian stimulation protocols for assisted reproduction: a network meta-analysis. Cochrane Database Syst Rev, 2025. 7(7): p. CD012586.

2. Lobo, R., et al., One-year cumulative live birth rate associated with the number of oocytes in ovarian stimulation with follitropin delta: a pooled analysis of four randomized controlled trials. Hum Reprod, 2025. 40(8): p. 1526–1534.

1. Melo, P., et al., Controlled ovarian stimulation protocols for assisted reproduction: a network meta-analysis. Cochrane Database Syst Rev, 2025. 7(7): p. CD012586.

2. Lobo, R., et al., One-year cumulative live birth rate associated with the number of oocytes in ovarian stimulation with follitropin delta: a pooled analysis of four randomized controlled trials. Hum Reprod, 2025. 40(8): p. 1526–1534.

1. Melo, P., et al., Controlled ovarian stimulation protocols for assisted reproduction: a network meta-analysis. Cochrane Database Syst Rev, 2025. 7(7): p. CD012586.

2. Lobo, R., et al., One-year cumulative live birth rate associated with the number of oocytes in ovarian stimulation with follitropin delta: a pooled analysis of four randomized controlled trials. Hum Reprod, 2025. 40(8): p. 1526–1534.

1. Stimulation, E.G.G.o.O., et al., ESHRE guideline: ovarian stimulation for IVF/ICSI: an update in 2025dagger. Hum Reprod, 2026.

2. Melo, P., et al., Controlled ovarian stimulation protocols for assisted reproduction: a network meta-analysis. Cochrane Database Syst Rev, 2025. 7(7): p. CD012586.

3. Lobo, R., et al., One-year cumulative live birth rate associated with the number of oocytes in ovarian stimulation with follitropin delta: a pooled analysis of four randomized controlled trials. Hum Reprod, 2025. 40(8): p. 1526–1534.

1. Stimulation, E.G.G.o.O., et al., ESHRE guideline: ovarian stimulation for IVF/ICSI: an update in 2025dagger. Hum Reprod, 2026.

2. Melo, P., et al., Controlled ovarian stimulation protocols for assisted reproduction: a network meta-analysis. Cochrane Database Syst Rev, 2025. 7(7): p. CD012586.

3. Lobo, R., et al., One-year cumulative live birth rate associated with the number of oocytes in ovarian stimulation with follitropin delta: a pooled analysis of four randomized controlled trials. Hum Reprod, 2025. 40(8): p. 1526–1534.

1. Stimulation, E.G.G.o.O., et al., ESHRE guideline: ovarian stimulation for IVF/ICSI: an update in 2025dagger. Hum Reprod, 2026.

2. Melo, P., et al., Controlled ovarian stimulation protocols for assisted reproduction: a network meta-analysis. Cochrane Database Syst Rev, 2025. 7(7): p. CD012586.

3. Lobo, R., et al., One-year cumulative live birth rate associated with the number of oocytes in ovarian stimulation with follitropin delta: a pooled analysis of four randomized controlled trials. Hum Reprod, 2025. 40(8): p. 1526–1534.

1. Stimulation, E.G.G.o.O., et al., ESHRE guideline: ovarian stimulation for IVF/ICSI: an update in 2025dagger. Hum Reprod, 2026.

2. Melo, P., et al., Controlled ovarian stimulation protocols for assisted reproduction: a network meta-analysis. Cochrane Database Syst Rev, 2025. 7(7): p. CD012586.

3. Lobo, R., et al., One-year cumulative live birth rate associated with the number of oocytes in ovarian stimulation with follitropin delta: a pooled analysis of four randomized controlled trials. Hum Reprod, 2025. 40(8): p. 1526–1534.

4. Melo, P., et al., Controlled ovarian stimulation protocols for assisted reproduction: a network meta-analysis. Cochrane Database Syst Rev, 2025. 7(7): p. CD012586.

.

1. Stimulation, E.G.G.o.O., et al., ESHRE guideline: ovarian stimulation for IVF/ICSI: an update in 2025dagger. Hum Reprod, 2026.

2. Melo, P., et al., Controlled ovarian stimulation protocols for assisted reproduction: a network meta-analysis. Cochrane Database Syst Rev, 2025. 7(7): p. CD012586.

4. Melo, P., et al., Controlled ovarian stimulation protocols for assisted reproduction: a network meta-analysis. Cochrane Database Syst Rev, 2025. 7(7): p. CD012586.

1. Stimulation, E.G.G.o.O., et al., ESHRE guideline: ovarian stimulation for IVF/ICSI: an update in 2025dagger. Hum Reprod, 2026.

2. Melo, P., et al., Controlled ovarian stimulation protocols for assisted reproduction: a network meta-analysis. Cochrane Database Syst Rev, 2025. 7(7): p. CD012586.

3. Lobo, R., et al., One-year cumulative live birth rate associated with the number of oocytes in ovarian stimulation with follitropin delta: a pooled analysis of four randomized controlled trials. Hum Reprod, 2025. 40(8): p. 1526–1534.

1. Stimulation, E.G.G.o.O., et al., ESHRE guideline: ovarian stimulation for IVF/ICSI: an update in 2025dagger. Hum Reprod, 2026.

2. Melo, P., et al., Controlled ovarian stimulation protocols for assisted reproduction: a network meta-analysis. Cochrane Database Syst Rev, 2025. 7(7): p. CD012586.

3. Lobo, R., et al., One-year cumulative live birth rate associated with the number of oocytes in ovarian stimulation with follitropin delta: a pooled analysis of four randomized controlled trials. Hum Reprod, 2025. 40(8): p. 1526–1534.

1. Stimulation, E.G.G.o.O., et al., ESHRE guideline: ovarian stimulation for IVF/ICSI: an update in 2025dagger. Hum Reprod, 2026.

2. Melo, P., et al., Controlled ovarian stimulation protocols for assisted reproduction: a network meta-analysis. Cochrane Database Syst Rev, 2025. 7(7): p. CD012586.

3. Lobo, R., et al., One-year cumulative live birth rate associated with the number of oocytes in ovarian stimulation with follitropin delta: a pooled analysis of four randomized controlled trials. Hum Reprod, 2025. 40(8): p. 1526–1534.

1. Stimulation, E.G.G.o.O., et al., ESHRE guideline: ovarian stimulation for IVF/ICSI: an update in 2025dagger. Hum Reprod, 2026.

2. Melo, P., et al., Controlled ovarian stimulation protocols for assisted reproduction: a network meta-analysis. Cochrane Database Syst Rev, 2025. 7(7): p. CD012586.

3. Lobo, R., et al., One-year cumulative live birth rate associated with the number of oocytes in ovarian stimulation with follitropin delta: a pooled analysis of four randomized controlled trials. Hum Reprod, 2025. 40(8): p. 1526–1534.

5. Ren, J., et al., Does prolonged pituitary down-regulation with gonadotropin-releasing hormone agonist improve the live-birth rate in in vitro fertilization treatment? Fertil Steril, 2014. 102(1): p. 75–81.

1. Stimulation, E.G.G.o.O., et al., ESHRE guideline: ovarian stimulation for IVF/ICSI: an update in 2025dagger. Hum Reprod, 2026.

2. Melo, P., et al., Controlled ovarian stimulation protocols for assisted reproduction: a network meta-analysis. Cochrane Database Syst Rev, 2025. 7(7): p. CD012586.

3. Lobo, R., et al., One-year cumulative live birth rate associated with the number of oocytes in ovarian stimulation with follitropin delta: a pooled analysis of four randomized controlled trials. Hum Reprod, 2025. 40(8): p. 1526–1534.

5. Ren, J., et al., Does prolonged pituitary down-regulation with gonadotropin-releasing hormone agonist improve the live-birth rate in in vitro fertilization treatment? Fertil Steril, 2014. 102(1): p. 75–81.

1. Stimulation, E.G.G.o.O., et al., ESHRE guideline: ovarian stimulation for IVF/ICSI: an update in 2025dagger. Hum Reprod, 2026.

2. Melo, P., et al., Controlled ovarian stimulation protocols for assisted reproduction: a network meta-analysis. Cochrane Database Syst Rev, 2025. 7(7): p. CD012586.

3. Lobo, R., et al., One-year cumulative live birth rate associated with the number of oocytes in ovarian stimulation with follitropin delta: a pooled analysis of four randomized controlled trials. Hum Reprod, 2025. 40(8): p. 1526–1534.

5. Ren, J., et al., Does prolonged pituitary down-regulation with gonadotropin-releasing hormone agonist improve the live-birth rate in in vitro fertilization treatment? Fertil Steril, 2014. 102(1): p. 75–81.

6. Song, J., et al., Comparison of GnRH-a Prolonged Protocol and Short GnRH-a Long Protocol in Patients with Thin Endometrium for Assisted Reproduction: A Retrospective Cohort Study. Drug Des Devel Ther, 2020. 14: p. 3673–3682.

1. Stimulation, E.G.G.o.O., et al., ESHRE guideline: ovarian stimulation for IVF/ICSI: an update in 2025dagger. Hum Reprod, 2026.

2. Melo, P., et al., Controlled ovarian stimulation protocols for assisted reproduction: a network meta-analysis. Cochrane Database Syst Rev, 2025. 7(7): p. CD012586.

3. Lobo, R., et al., One-year cumulative live birth rate associated with the number of oocytes in ovarian stimulation with follitropin delta: a pooled analysis of four randomized controlled trials. Hum Reprod, 2025. 40(8): p. 1526–1534.

5. Ren, J., et al., Does prolonged pituitary down-regulation with gonadotropin-releasing hormone agonist improve the live-birth rate in in vitro fertilization treatment? Fertil Steril, 2014. 102(1): p. 75–81.

6. Song, J., et al., Comparison of GnRH-a Prolonged Protocol and Short GnRH-a Long Protocol in Patients with Thin Endometrium for Assisted Reproduction: A Retrospective Cohort Study. Drug Des Devel Ther, 2020. 14: p. 3673–3682.

7. Tian, L.F., et al., Mild starting dosage ovarian stimulation combined with a modified prolonged GnRH-a protocol improved IVF/ICSI outcomes in normal ovarian responders. Arch Med Sci, 2019. 15(5): p. 1294–1300.

1. Stimulation, E.G.G.o.O., et al., ESHRE guideline: ovarian stimulation for IVF/ICSI: an update in 2025dagger. Hum Reprod, 2026.

2. Melo, P., et al., Controlled ovarian stimulation protocols for assisted reproduction: a network meta-analysis. Cochrane Database Syst Rev, 2025. 7(7): p. CD012586.

3. Lobo, R., et al., One-year cumulative live birth rate associated with the number of oocytes in ovarian stimulation with follitropin delta: a pooled analysis of four randomized controlled trials. Hum Reprod, 2025. 40(8): p. 1526–1534.

5. Ren, J., et al., Does prolonged pituitary down-regulation with gonadotropin-releasing hormone agonist improve the live-birth rate in in vitro fertilization treatment? Fertil Steril, 2014. 102(1): p. 75–81.

6. Song, J., et al., Comparison of GnRH-a Prolonged Protocol and Short GnRH-a Long Protocol in Patients with Thin Endometrium for Assisted Reproduction: A Retrospective Cohort Study. Drug Des Devel Ther, 2020. 14: p. 3673–3682.

7. Tian, L.F., et al., Mild starting dosage ovarian stimulation combined with a modified prolonged GnRH-a protocol improved IVF/ICSI outcomes in normal ovarian responders. Arch Med Sci, 2019. 15(5): p. 1294–1300.

8. Xu, B., et al., The depot GnRH agonist protocol improves the live birth rate per fresh embryo transfer cycle, but not the cumulative live birth rate in normal responders: a randomized controlled trial and molecular mechanism study. Hum Reprod, 2020. 35(6): p. 1306–1318.

1. Stimulation, E.G.G.o.O., et al., ESHRE guideline: ovarian stimulation for IVF/ICSI: an update in 2025dagger. Hum Reprod, 2026.

3. Lobo, R., et al., One-year cumulative live birth rate associated with the number of oocytes in ovarian stimulation with follitropin delta: a pooled analysis of four randomized controlled trials. Hum Reprod, 2025. 40(8): p. 1526–1534.

5. Ren, J., et al., Does prolonged pituitary down-regulation with gonadotropin-releasing hormone agonist improve the live-birth rate in in vitro fertilization treatment? Fertil Steril, 2014. 102(1): p. 75–81.

6. Song, J., et al., Comparison of GnRH-a Prolonged Protocol and Short GnRH-a Long Protocol in Patients with Thin Endometrium for Assisted Reproduction: A Retrospective Cohort Study. Drug Des Devel Ther, 2020. 14: p. 3673–3682.

7. Tian, L.F., et al., Mild starting dosage ovarian stimulation combined with a modified prolonged GnRH-a protocol improved IVF/ICSI outcomes in normal ovarian responders. Arch Med Sci, 2019. 15(5): p. 1294–1300.
9. Xu, B., et al., The depot GnRH agonist protocol improves the live birth rate per fresh embryo transfer cycle, but not the cumulative live birth rate in normal responders: a randomized controlled trial and molecular mechanism study. Hum Reprod, 2020. 35(6): p. 1306–1318.

1. Stimulation, E.G.G.o.O., et al., ESHRE guideline: ovarian stimulation for IVF/ICSI: an update in 2025dagger. Hum Reprod, 2026.

2. Melo, P., et al., Controlled ovarian stimulation protocols for assisted reproduction: a network meta-analysis. Cochrane Database Syst Rev, 2025. 7(7): p. CD012586.

3. Lobo, R., et al., One-year cumulative live birth rate associated with the number of oocytes in ovarian stimulation with follitropin delta: a pooled analysis of four randomized controlled trials. Hum Reprod, 2025. 40(8): p. 1526–1534.

5. Ren, J., et al., Does prolonged pituitary down-regulation with gonadotropin-releasing hormone agonist improve the live-birth rate in in vitro fertilization treatment? Fertil Steril, 2014. 102(1): p. 75–81.

6. Song, J., et al., Comparison of GnRH-a Prolonged Protocol and Short GnRH-a Long Protocol in Patients with Thin Endometrium for Assisted Reproduction: A Retrospective Cohort Study. Drug Des Devel Ther, 2020. 14: p. 3673–3682.

7. Tian, L.F., et al., Mild starting dosage ovarian stimulation combined with a modified prolonged GnRH-a protocol improved IVF/ICSI outcomes in normal ovarian responders. Arch Med Sci, 2019. 15(5): p. 1294–1300.

8. Xu, B., et al., The depot GnRH agonist protocol improves the live birth rate per fresh embryo transfer cycle, but not the cumulative live birth rate in normal responders: a randomized controlled trial and molecular mechanism study. Hum Reprod, 2020. 35(6): p. 1306–1318.

.

1. Stimulation, E.G.G.o.O., et al., ESHRE guideline: ovarian stimulation for IVF/ICSI: an update in 2025dagger. Hum Reprod, 2026.

2. Melo, P., et al., Controlled ovarian stimulation protocols for assisted reproduction: a network meta-analysis. Cochrane Database Syst Rev, 2025. 7(7): p. CD012586.

3. Lobo, R., et al., One-year cumulative live birth rate associated with the number of oocytes in ovarian stimulation with follitropin delta: a pooled analysis of four randomized controlled trials. Hum Reprod, 2025. 40(8): p. 1526–1534.

5. Ren, J., et al., Does prolonged pituitary down-regulation with gonadotropin-releasing hormone agonist improve the live-birth rate in in vitro fertilization treatment? Fertil Steril, 2014. 102(1): p. 75–81.

6. Song, J., et al., Comparison of GnRH-a Prolonged Protocol and Short GnRH-a Long Protocol in Patients with Thin Endometrium for Assisted Reproduction: A Retrospective Cohort Study. Drug Des Devel Ther, 2020. 14: p. 3673–3682.

7. Tian, L.F., et al., Mild starting dosage ovarian stimulation combined with a modified prolonged GnRH-a protocol improved IVF/ICSI outcomes in normal ovarian responders. Arch Med Sci, 2019. 15(5): p. 1294–1300.

8. Xu, B., et al., The depot GnRH agonist protocol improves the live birth rate per fresh embryo transfer cycle, but not the cumulative live birth rate in normal responders: a randomized controlled trial and molecular mechanism study. Hum Reprod, 2020. 35(6): p. 1306–1318.

9. La Marca, A. and S.K. Sunkara, Individualization of controlled ovarian stimulation in IVF using ovarian reserve markers: from theory to practice. Hum Reprod Update, 2014. 20(1): p. 124–40.

1. Stimulation, E.G.G.o.O., et al., ESHRE guideline: ovarian stimulation for IVF/ICSI: an update in 2025dagger. Hum Reprod, 2026.

2. Melo, P., et al., Controlled ovarian stimulation protocols for assisted reproduction: a network meta-analysis. Cochrane Database Syst Rev, 2025. 7(7): p. CD012586.

3. Lobo, R., et al., One-year cumulative live birth rate associated with the number of oocytes in ovarian stimulation with follitropin delta: a pooled analysis of four randomized controlled trials. Hum Reprod, 2025. 40(8): p. 1526–1534.

5. Kuan, K.K.W., S. Omoseni, and J.A. Tello, Comparing ART outcomes in women with endometriosis after GnRH agonist versus GnRH antagonist ovarian stimulation: a systematic review. Ther Adv Endocrinol Metab, 2023. 14: p. 20420188231173325.

7. Song, J., et al., Comparison of GnRH-a Prolonged Protocol and Short GnRH-a Long Protocol in Patients with Thin Endometrium for Assisted Reproduction: A Retrospective Cohort Study. Drug Des Devel Ther, 2020. 14: p. 3673–3682.

8. Tian, L.F., et al., Mild starting dosage ovarian stimulation combined with a modified prolonged GnRH-a protocol improved IVF/ICSI outcomes in normal ovarian responders. Arch Med Sci, 2019. 15(5): p. 1294–1300.

9. Xu, B., et al., The depot GnRH agonist protocol improves the live birth rate per fresh embryo transfer cycle, but not the cumulative live birth rate in normal responders: a randomized controlled trial and molecular mechanism study. Hum Reprod, 2020. 35(6): p. 1306–1318.

10. La Marca, A. and S.K. Sunkara, Individualization of controlled ovarian stimulation in IVF using ovarian reserve markers: from theory to practice. Hum Reprod Update, 2014. 20(1): p. 124–40.

6. Ren, J., et al., Does prolonged pituitary down-regulation with gonadotropin-releasing hormone agonist improve the live-birth rate in in vitro fertilization treatment? Fertil Steril, 2014. 102(1): p. 75–81.

1. Stimulation, E.G.G.o.O., et al., ESHRE guideline: ovarian stimulation for IVF/ICSI: an update in 2025dagger. Hum Reprod, 2026.

2. Melo, P., et al., Controlled ovarian stimulation protocols for assisted reproduction: a network meta-analysis. Cochrane Database Syst Rev, 2025. 7(7): p. CD012586.

3. Lobo, R., et al., One-year cumulative live birth rate associated with the number of oocytes in ovarian stimulation with follitropin delta: a pooled analysis of four randomized controlled trials. Hum Reprod, 2025. 40(8): p. 1526–1534.

5. Kuan, K.K.W., S. Omoseni, and J.A. Tello, Comparing ART outcomes in women with endometriosis after GnRH agonist versus GnRH antagonist ovarian stimulation: a systematic review. Ther Adv Endocrinol Metab, 2023. 14: p. 20420188231173325.

6. Ren, J., et al., Does prolonged pituitary down-regulation with gonadotropin-releasing hormone agonist improve the live-birth rate in in vitro fertilization treatment? Fertil Steril, 2014. 102(1): p. 75–81.

8. Tian, L.F., et al., Mild starting dosage ovarian stimulation combined with a modified prolonged GnRH-a protocol improved IVF/ICSI outcomes in normal ovarian responders. Arch Med Sci, 2019. 15(5): p. 1294–1300.

9. Xu, B., et al., The depot GnRH agonist protocol improves the live birth rate per fresh embryo transfer cycle, but not the cumulative live birth rate in normal responders: a randomized controlled trial and molecular mechanism study. Hum Reprod, 2020. 35(6): p. 1306–1318.

10. La Marca, A. and S.K. Sunkara, Individualization of controlled ovarian stimulation in IVF using ovarian reserve markers: from theory to practice. Hum Reprod Update, 2014. 20(1): p. 124–40.

**References:
1. Stimulation, E.G.G.o.O., et al., ESHRE guideline: ovarian stimulation for IVF/ICSI: an update in 2025dagger. Hum Reprod, 2026.**

**2. Melo, P., et al., Controlled ovarian stimulation protocols for assisted reproduction: a network meta-analysis. Cochrane Database Syst Rev, 2025. 7(7): p. CD012586.**

**3. Lobo, R., et al., One-year cumulative live birth rate associated with the number of oocytes in ovarian stimulation with follitropin delta: a pooled analysis of four randomized controlled trials. Hum Reprod, 2025. 40(8): p. 1526–1534.**

**5. Kuan, K.K.W., S. Omoseni, and J.A. Tello, Comparing ART outcomes in women with endometriosis after GnRH agonist versus GnRH antagonist ovarian stimulation: a systematic review. Ther Adv Endocrinol Metab, 2023. 14: p. 20420188231173325.**

**6. Ren, J., et al., Does prolonged pituitary down-regulation with gonadotropin-releasing hormone agonist improve the live-birth rate in in vitro fertilization treatment? Fertil Steril, 2014. 102(1): p. 75–81.**

**7. Song, J., et al., Comparison of GnRH-a Prolonged Protocol and Short GnRH-a Long Protocol in Patients with Thin Endometrium for Assisted Reproduction: A Retrospective Cohort Study. Drug Des Devel Ther, 2020. 14: p. 3673–3682.**

**8. Tian, L.F., et al., Mild starting dosage ovarian stimulation combined with a modified prolonged GnRH-a protocol improved IVF/ICSI outcomes in normal ovarian responders. Arch Med Sci, 2019. 15(5): p. 1294–1300.**

**9. Xu, B., et al., The depot GnRH agonist protocol improves the live birth rate per fresh embryo transfer cycle, but not the cumulative live birth rate in normal responders: a randomized controlled trial and molecular mechanism study. Hum Reprod, 2020. 35(6): p. 1306–1318.**

**11. La Marca, A. and S.K. Sunkara, Individualization of controlled ovarian stimulation in IVF using ovarian reserve markers: from theory to practice. Hum Reprod Update, 2014. 20(1): p. 124–40.**

1. Stimulation, E.G.G.o.O., et al., ESHRE guideline: ovarian stimulation for IVF/ICSI: an update in 2025dagger. Hum Reprod, 2026.

2. Melo, P., et al., Controlled ovarian stimulation protocols for assisted reproduction: a network meta-analysis. Cochrane Database Syst Rev, 2025. 7(7): p. CD012586.

3. Lobo, R., et al., One-year cumulative live birth rate associated with the number of oocytes in ovarian stimulation with follitropin delta: a pooled analysis of four randomized controlled trials. Hum Reprod, 2025. 40(8): p. 1526–1534.

5. Kuan, K.K.W., S. Omoseni, and J.A. Tello, Comparing ART outcomes in women with endometriosis after GnRH agonist versus GnRH antagonist ovarian stimulation: a systematic review. Ther Adv Endocrinol Metab, 2023. 14: p. 20420188231173325.

6. Ren, J., et al., Does prolonged pituitary down-regulation with gonadotropin-releasing hormone agonist improve the live-birth rate in in vitro fertilization treatment? Fertil Steril, 2014. 102(1): p. 75–81.

7. Song, J., et al., Comparison of GnRH-a Prolonged Protocol and Short GnRH-a Long Protocol in Patients with Thin Endometrium for Assisted Reproduction: A Retrospective Cohort Study. Drug Des Devel Ther, 2020. 14: p. 3673–3682.

8. Tian, L.F., et al., Mild starting dosage ovarian stimulation combined with a modified prolonged GnRH-a protocol improved IVF/ICSI outcomes in normal ovarian responders. Arch Med Sci, 2019. 15(5): p. 1294–1300.

9. Xu, B., et al., The depot GnRH agonist protocol improves the live birth rate per fresh embryo transfer cycle, but not the cumulative live birth rate in normal responders: a randomized controlled trial and molecular mechanism study. Hum Reprod, 2020. 35(6): p. 1306–1318.

10. La Marca, A. and S.K. Sunkara, Individualization of controlled ovarian stimulation in IVF using ovarian reserve markers: from theory to practice. Hum Reprod Update, 2014. 20(1): p. 124–40.

1. Stimulation, E.G.G.o.O., et al., ESHRE guideline: ovarian stimulation for IVF/ICSI: an update in 2025dagger. Hum Reprod, 2026.

2. Melo, P., et al., Controlled ovarian stimulation protocols for assisted reproduction: a network meta-analysis. Cochrane Database Syst Rev, 2025. 7(7): p. CD012586.

3. Lobo, R., et al., One-year cumulative live birth rate associated with the number of oocytes in ovarian stimulation with follitropin delta: a pooled analysis of four randomized controlled trials. Hum Reprod, 2025. 40(8): p. 1526–1534.

5. Kuan, K.K.W., S. Omoseni, and J.A. Tello, Comparing ART outcomes in women with endometriosis after GnRH agonist versus GnRH antagonist ovarian stimulation: a systematic review. Ther Adv Endocrinol Metab, 2023. 14: p. 20420188231173325.

6. Ren, J., et al., Does prolonged pituitary down-regulation with gonadotropin-releasing hormone agonist improve the live-birth rate in in vitro fertilization treatment? Fertil Steril, 2014. 102(1): p. 75–81.

7. Song, J., et al., Comparison of GnRH-a Prolonged Protocol and Short GnRH-a Long Protocol in Patients with Thin Endometrium for Assisted Reproduction: A Retrospective Cohort Study. Drug Des Devel Ther, 2020. 14: p. 3673–3682.

8. Tian, L.F., et al., Mild starting dosage ovarian stimulation combined with a modified prolonged GnRH-a protocol improved IVF/ICSI outcomes in normal ovarian responders. Arch Med Sci, 2019. 15(5): p. 1294–1300.

9. Xu, B., et al., The depot GnRH agonist protocol improves the live birth rate per fresh embryo transfer cycle, but not the cumulative live birth rate in normal responders: a randomized controlled trial and molecular mechanism study. Hum Reprod, 2020. 35(6): p. 1306–1318.

10. La Marca, A. and S.K. Sunkara, Individualization of controlled ovarian stimulation in IVF using ovarian reserve markers: from theory to practice. Hum Reprod Update, 2014. 20(1): p. 124–40.

11. Xu, B., et al., The depot GnRH agonist protocol improves the live birth rate per fresh embryo transfer cycle, but not the cumulative live birth rate in normal responders: a randomized controlled trial and molecular mechanism study. Hum Reprod, 2020. 35(6): p. 1306–1318.

1. Stimulation, E.G.G.o.O., et al., ESHRE guideline: ovarian stimulation for IVF/ICSI: an update in 2025dagger. Hum Reprod, 2026.

2. Melo, P., et al., Controlled ovarian stimulation protocols for assisted reproduction: a network meta-analysis. Cochrane Database Syst Rev, 2025. 7(7): p. CD012586.

3. Lobo, R., et al., One-year cumulative live birth rate associated with the number of oocytes in ovarian stimulation with follitropin delta: a pooled analysis of four randomized controlled trials. Hum Reprod, 2025. 40(8): p. 1526–1534.

5. Kuan, K.K.W., S. Omoseni, and J.A. Tello, Comparing ART outcomes in women with endometriosis after GnRH agonist versus GnRH antagonist ovarian stimulation: a systematic review. Ther Adv Endocrinol Metab, 2023. 14: p. 20420188231173325.

6. Ren, J., et al., Does prolonged pituitary down-regulation with gonadotropin-releasing hormone agonist improve the live-birth rate in in vitro fertilization treatment? Fertil Steril, 2014. 102(1): p. 75–81.

7. Song, J., et al., Comparison of GnRH-a Prolonged Protocol and Short GnRH-a Long Protocol in Patients with Thin Endometrium for Assisted Reproduction: A Retrospective Cohort Study. Drug Des Devel Ther, 2020. 14: p. 3673–3682.

8. Tian, L.F., et al., Mild starting dosage ovarian stimulation combined with a modified prolonged GnRH-a protocol improved IVF/ICSI outcomes in normal ovarian responders. Arch Med Sci, 2019. 15(5): p. 1294–1300.

9. Xu, B., et al., The depot GnRH agonist protocol improves the live birth rate per fresh embryo transfer cycle, but not the cumulative live birth rate in normal responders: a randomized controlled trial and molecular mechanism study. Hum Reprod, 2020. 35(6): p. 1306–1318.

10. La Marca, A. and S.K. Sunkara, Individualization of controlled ovarian stimulation in IVF using ovarian reserve markers: from theory to practice. Hum Reprod Update, 2014. 20(1): p. 124–40.

1. Stimulation, E.G.G.o.O., et al., ESHRE guideline: ovarian stimulation for IVF/ICSI: an update in 2025dagger. Hum Reprod, 2026.

2. Melo, P., et al., Controlled ovarian stimulation protocols for assisted reproduction: a network meta-analysis. Cochrane Database Syst Rev, 2025. 7(7): p. CD012586.

3. Lobo, R., et al., One-year cumulative live birth rate associated with the number of oocytes in ovarian stimulation with follitropin delta: a pooled analysis of four randomized controlled trials. Hum Reprod, 2025. 40(8): p. 1526–1534.

5. Kuan, K.K.W., S. Omoseni, and J.A. Tello, Comparing ART outcomes in women with endometriosis after GnRH agonist versus GnRH antagonist ovarian stimulation: a systematic review. Ther Adv Endocrinol Metab, 2023. 14: p. 20420188231173325.

6. Ren, J., et al., Does prolonged pituitary down-regulation with gonadotropin-releasing hormone agonist improve the live-birth rate in in vitro fertilization treatment? Fertil Steril, 2014. 102(1): p. 75–81.

7. Song, J., et al., Comparison of GnRH-a Prolonged Protocol and Short GnRH-a Long Protocol in Patients with Thin Endometrium for Assisted Reproduction: A Retrospective Cohort Study. Drug Des Devel Ther, 2020. 14: p. 3673–3682.

8. Tian, L.F., et al., Mild starting dosage ovarian stimulation combined with a modified prolonged GnRH-a protocol improved IVF/ICSI outcomes in normal ovarian responders. Arch Med Sci, 2019. 15(5): p. 1294–1300.

9. Xu, B., et al., The depot GnRH agonist protocol improves the live birth rate per fresh embryo transfer cycle, but not the cumulative live birth rate in normal responders: a randomized controlled trial and molecular mechanism study. Hum Reprod, 2020. 35(6): p. 1306–1318.

10. La Marca, A. and S.K. Sunkara, Individualization of controlled ovarian stimulation in IVF using ovarian reserve markers: from theory to practice. Hum Reprod Update, 2014. 20(1): p. 124–40.

11. Toftager, M., et al., Cumulative live birth rates after one ART cycle including all subsequent frozen-thaw cycles in 1050 women: secondary outcome of an RCT comparing GnRH-antagonist and GnRH-agonist protocols. Hum Reprod, 2017. 32(3): p. 556–567.

1. Stimulation, E.G.G.o.O., et al., ESHRE guideline: ovarian stimulation for IVF/ICSI: an update in 2025dagger. Hum Reprod, 2026.

2. Melo, P., et al., Controlled ovarian stimulation protocols for assisted reproduction: a network meta-analysis. Cochrane Database Syst Rev, 2025. 7(7): p. CD012586.

5. Kuan, K.K.W., S. Omoseni, and J.A. Tello, Comparing ART outcomes in women with endometriosis after GnRH agonist versus GnRH antagonist ovarian stimulation: a systematic review. Ther Adv Endocrinol Metab, 2023. 14: p. 20420188231173325.

6. Ren, J., et al., Does prolonged pituitary down-regulation with gonadotropin-releasing hormone agonist improve the live-birth rate in in vitro fertilization treatment? Fertil Steril, 2014. 102(1): p. 75–81.

7. Song, J., et al., Comparison of GnRH-a Prolonged Protocol and Short GnRH-a Long Protocol in Patients with Thin Endometrium for Assisted Reproduction: A Retrospective Cohort Study. Drug Des Devel Ther, 2020. 14: p. 3673–3682.

8. Tian, L.F., et al., Mild starting dosage ovarian stimulation combined with a modified prolonged GnRH-a protocol improved IVF/ICSI outcomes in normal ovarian responders. Arch Med Sci, 2019. 15(5): p. 1294–1300.

9. Xu, B., et al., The depot GnRH agonist protocol improves the live birth rate per fresh embryo transfer cycle, but not the cumulative live birth rate in normal responders: a randomized controlled trial and molecular mechanism study. Hum Reprod, 2020. 35(6): p. 1306–1318.

10. La Marca, A. and S.K. Sunkara, Individualization of controlled ovarian stimulation in IVF using ovarian reserve markers: from theory to practice. Hum Reprod Update, 2014. 20(1): p. 124–40.

11. Toftager, M., et al., Cumulative live birth rates after one ART cycle including all subsequent frozen-thaw cycles in 1050 women: secondary outcome of an RCT comparing GnRH-antagonist and GnRH-agonist protocols. Hum Reprod, 2017. 32(3): p. 556–567.

12. Xu, B., et al., The depot GnRH agonist protocol improves the live birth rate per fresh embryo transfer cycle, but not the cumulative live birth rate in normal responders: a randomized controlled trial and molecular mechanism study. Hum Reprod, 2020. 35(6): p. 1306–1318.

1. Stimulation, E.G.G.o.O., et al., ESHRE guideline: ovarian stimulation for IVF/ICSI: an update in 2025dagger. Hum Reprod, 2026.

2. Melo, P., et al., Controlled ovarian stimulation protocols for assisted reproduction: a network meta-analysis. Cochrane Database Syst Rev, 2025. 7(7): p. CD012586.

3. Lobo, R., et al., One-year cumulative live birth rate associated with the number of oocytes in ovarian stimulation with follitropin delta: a pooled analysis of four randomized controlled trials. Hum Reprod, 2025. 40(8): p. 1526–1534.

5. Kuan, K.K.W., S. Omoseni, and J.A. Tello, Comparing ART outcomes in women with endometriosis after GnRH agonist versus GnRH antagonist ovarian stimulation: a systematic review. Ther Adv Endocrinol Metab, 2023. 14: p. 20420188231173325.

6. Ren, J., et al., Does prolonged pituitary down-regulation with gonadotropin-releasing hormone agonist improve the live-birth rate in in vitro fertilization treatment? Fertil Steril, 2014. 102(1): p. 75–81.

7. Song, J., et al., Comparison of GnRH-a Prolonged Protocol and Short GnRH-a Long Protocol in Patients with Thin Endometrium for Assisted Reproduction: A Retrospective Cohort Study. Drug Des Devel Ther, 2020. 14: p. 3673–3682.

8. Tian, L.F., et al., Mild starting dosage ovarian stimulation combined with a modified prolonged GnRH-a protocol improved IVF/ICSI outcomes in normal ovarian responders. Arch Med Sci, 2019. 15(5): p. 1294–1300.

10. La Marca, A. and S.K. Sunkara, Individualization of controlled ovarian stimulation in IVF using ovarian reserve markers: from theory to practice. Hum Reprod Update, 2014. 20(1): p. 124–40.

9. Xu, B., et al., The depot GnRH agonist protocol improves the live birth rate per fresh embryo transfer cycle, but not the cumulative live birth rate in normal responders: a randomized controlled trial and molecular mechanism study. Hum Reprod, 2020. 35(6): p. 1306–1318.

11. Toftager, M., et al., Cumulative live birth rates after one ART cycle including all subsequent frozen-thaw cycles in 1050 women: secondary outcome of an RCT comparing GnRH-antagonist and GnRH-agonist protocols. Hum Reprod, 2017. 32(3): p. 556–567.

1. Stimulation, E.G.G.o.O., et al., ESHRE guideline: ovarian stimulation for IVF/ICSI: an update in 2025dagger. Hum Reprod, 2026.

2. Melo, P., et al., Controlled ovarian stimulation protocols for assisted reproduction: a network meta-analysis. Cochrane Database Syst Rev, 2025. 7(7): p. CD012586.

3. Lobo, R., et al., One-year cumulative live birth rate associated with the number of oocytes in ovarian stimulation with follitropin delta: a pooled analysis of four randomized controlled trials. Hum Reprod, 2025. 40(8): p. 1526–1534.

5. Kuan, K.K.W., S. Omoseni, and J.A. Tello, Comparing ART outcomes in women with endometriosis after GnRH agonist versus GnRH antagonist ovarian stimulation: a systematic review. Ther Adv Endocrinol Metab, 2023. 14: p. 20420188231173325.

6. Ren, J., et al., Does prolonged pituitary down-regulation with gonadotropin-releasing hormone agonist improve the live-birth rate in in vitro fertilization treatment? Fertil Steril, 2014. 102(1): p. 75–81.

7. Song, J., et al., Comparison of GnRH-a Prolonged Protocol and Short GnRH-a Long Protocol in Patients with Thin Endometrium for Assisted Reproduction: A Retrospective Cohort Study. Drug Des Devel Ther, 2020. 14: p. 3673–3682.

8. Tian, L.F., et al., Mild starting dosage ovarian stimulation combined with a modified prolonged GnRH-a protocol improved IVF/ICSI outcomes in normal ovarian responders. Arch Med Sci, 2019. 15(5): p. 1294–1300.

9. Xu, B., et al., The depot GnRH agonist protocol improves the live birth rate per fresh embryo transfer cycle, but not the cumulative live birth rate in normal responders: a randomized controlled trial and molecular mechanism study. Hum Reprod, 2020. 35(6): p. 1306–1318.

10. La Marca, A. and S.K. Sunkara, Individualization of controlled ovarian stimulation in IVF using ovarian reserve markers: from theory to practice. Hum Reprod Update, 2014. 20(1): p. 124–40.

11. Toftager, M., et al., Cumulative live birth rates after one ART cycle including all subsequent frozen-thaw cycles in 1050 women: secondary outcome of an RCT comparing GnRH-antagonist and GnRH-agonist protocols. Hum Reprod, 2017. 32(3): p. 556–567.

12. Xu, B., et al., The depot GnRH agonist protocol improves the live birth rate per fresh embryo transfer cycle, but not the cumulative live birth rate in normal responders: a randomized controlled trial and molecular mechanism study. Hum Reprod, 2020. 35(6): p. 1306–1318.

1. Stimulation, E.G.G.o.O., et al., ESHRE guideline: ovarian stimulation for IVF/ICSI: an update in 2025dagger. Hum Reprod, 2026.

2. Melo, P., et al., Controlled ovarian stimulation protocols for assisted reproduction: a network meta-analysis. Cochrane Database Syst Rev, 2025. 7(7): p. CD012586.

3. Lobo, R., et al., One-year cumulative live birth rate associated with the number of oocytes in ovarian stimulation with follitropin delta: a pooled analysis of four randomized controlled trials. Hum Reprod, 2025. 40(8): p. 1526–1534.

5. Kuan, K.K.W., S. Omoseni, and J.A. Tello, Comparing ART outcomes in women with endometriosis after GnRH agonist versus GnRH antagonist ovarian stimulation: a systematic review. Ther Adv Endocrinol Metab, 2023. 14: p. 20420188231173325.

6. Ren, J., et al., Does prolonged pituitary down-regulation with gonadotropin-releasing hormone agonist improve the live-birth rate in in vitro fertilization treatment? Fertil Steril, 2014. 102(1): p. 75–81.

7. Song, J., et al., Comparison of GnRH-a Prolonged Protocol and Short GnRH-a Long Protocol in Patients with Thin Endometrium for Assisted Reproduction: A Retrospective Cohort Study. Drug Des Devel Ther, 2020. 14: p. 3673–3682.

8. Tian, L.F., et al., Mild starting dosage ovarian stimulation combined with a modified prolonged GnRH-a protocol improved IVF/ICSI outcomes in normal ovarian responders. Arch Med Sci, 2019. 15(5): p. 1294–1300.

9. Xu, B., et al., The depot GnRH agonist protocol improves the live birth rate per fresh embryo transfer cycle, but not the cumulative live birth rate in normal responders: a randomized controlled trial and molecular mechanism study. Hum Reprod, 2020. 35(6): p. 1306–1318.

10. La Marca, A. and S.K. Sunkara, Individualization of controlled ovarian stimulation in IVF using ovarian reserve markers: from theory to practice. Hum Reprod Update, 2014. 20(1): p. 124–40.

11. Toftager, M., et al., Cumulative live birth rates after one ART cycle including all subsequent frozen-thaw cycles in 1050 women: secondary outcome of an RCT comparing GnRH-antagonist and GnRH-agonist protocols. Hum Reprod, 2017. 32(3): p. 556–567.

12. Xu, B., et al., The depot GnRH agonist protocol improves the live birth rate per fresh embryo transfer cycle, but not the cumulative live birth rate in normal responders: a randomized controlled trial and molecular mechanism study. Hum Reprod, 2020. 35(6): p. 1306–1318.

1. Stimulation, E.G.G.o.O., et al., ESHRE guideline: ovarian stimulation for IVF/ICSI: an update in 2025dagger. Hum Reprod, 2026.

2. Melo, P., et al., Controlled ovarian stimulation protocols for assisted reproduction: a network meta-analysis. Cochrane Database Syst Rev, 2025. 7(7): p. CD012586.

3. Lobo, R., et al., One-year cumulative live birth rate associated with the number of oocytes in ovarian stimulation with follitropin delta: a pooled analysis of four randomized controlled trials. Hum Reprod, 2025. 40(8): p. 1526–1534.

5. Kuan, K.K.W., S. Omoseni, and J.A. Tello, Comparing ART outcomes in women with endometriosis after GnRH agonist versus GnRH antagonist ovarian stimulation: a systematic review. Ther Adv Endocrinol Metab, 2023. 14: p. 20420188231173325.

6. Ren, J., et al., Does prolonged pituitary down-regulation with gonadotropin-releasing hormone agonist improve the live-birth rate in in vitro fertilization treatment? Fertil Steril, 2014. 102(1): p. 75–81.

7. Song, J., et al., Comparison of GnRH-a Prolonged Protocol and Short GnRH-a Long Protocol in Patients with Thin Endometrium for Assisted Reproduction: A Retrospective Cohort Study. Drug Des Devel Ther, 2020. 14: p. 3673–3682.

8. Tian, L.F., et al., Mild starting dosage ovarian stimulation combined with a modified prolonged GnRH-a protocol improved IVF/ICSI outcomes in normal ovarian responders. Arch Med Sci, 2019. 15(5): p. 1294–1300.

9. Xu, B., et al., The depot GnRH agonist protocol improves the live birth rate per fresh embryo transfer cycle, but not the cumulative live birth rate in normal responders: a randomized controlled trial and molecular mechanism study. Hum Reprod, 2020. 35(6): p. 1306–1318.

10. La Marca, A. and S.K. Sunkara, Individualization of controlled ovarian stimulation in IVF using ovarian reserve markers: from theory to practice. Hum Reprod Update, 2014. 20(1): p. 124–40.

11. Toftager, M., et al., Cumulative live birth rates after one ART cycle including all subsequent frozen-thaw cycles in 1050 women: secondary outcome of an RCT comparing GnRH-antagonist and GnRH-agonist protocols. Hum Reprod, 2017. 32(3): p. 556–567.

12. Xu, B., et al., The depot GnRH agonist protocol improves the live birth rate per fresh embryo transfer cycle, but not the cumulative live birth rate in normal responders: a randomized controlled trial and molecular mechanism study. Hum Reprod, 2020. 35(6): p. 1306–1318.

1. Stimulation, E.G.G.o.O., et al., ESHRE guideline: ovarian stimulation for IVF/ICSI: an update in 2025dagger. Hum Reprod, 2026.

2. Melo, P., et al., Controlled ovarian stimulation protocols for assisted reproduction: a network meta-analysis. Cochrane Database Syst Rev, 2025. 7(7): p. CD012586.

3. Lobo, R., et al., One-year cumulative live birth rate associated with the number of oocytes in ovarian stimulation with follitropin delta: a pooled analysis of four randomized controlled trials. Hum Reprod, 2025. 40(8): p. 1526–1534.

5. Kuan, K.K.W., S. Omoseni, and J.A. Tello, Comparing ART outcomes in women with endometriosis after GnRH agonist versus GnRH antagonist ovarian stimulation: a systematic review. Ther Adv Endocrinol Metab, 2023. 14: p. 20420188231173325.

6. Ren, J., et al., Does prolonged pituitary down-regulation with gonadotropin-releasing hormone agonist improve the live-birth rate in in vitro fertilization treatment? Fertil Steril, 2014. 102(1): p. 75–81.

7. Song, J., et al., Comparison of GnRH-a Prolonged Protocol and Short GnRH-a Long Protocol in Patients with Thin Endometrium for Assisted Reproduction: A Retrospective Cohort Study. Drug Des Devel Ther, 2020. 14: p. 3673–3682.

8. Tian, L.F., et al., Mild starting dosage ovarian stimulation combined with a modified prolonged GnRH-a protocol improved IVF/ICSI outcomes in normal ovarian responders. Arch Med Sci, 2019. 15(5): p. 1294–1300.

9. Xu, B., et al., The depot GnRH agonist protocol improves the live birth rate per fresh embryo transfer cycle, but not the cumulative live birth rate in normal responders: a randomized controlled trial and molecular mechanism study. Hum Reprod, 2020. 35(6): p. 1306–1318.

10. La Marca, A. and S.K. Sunkara, Individualization of controlled ovarian stimulation in IVF using ovarian reserve markers: from theory to practice. Hum Reprod Update, 2014. 20(1): p. 124–40.

12. Xu, B., et al., The depot GnRH agonist protocol improves the live birth rate per fresh embryo transfer cycle, but not the cumulative live birth rate in normal responders: a randomized controlled trial and molecular mechanism study. Hum Reprod, 2020. 35(6): p. 1306–1318.

13. Toftager, M., et al., Cumulative live birth rates after one ART cycle including all subsequent frozen-thaw cycles in 1050 women: secondary outcome of an RCT comparing GnRH-antagonist and GnRH-agonist protocols. Hum Reprod, 2017. 32(3): p. 556–567.

1. Stimulation, E.G.G.o.O., et al., ESHRE guideline: ovarian stimulation for IVF/ICSI: an update in 2025dagger. Hum Reprod, 2026.

2. Melo, P., et al., Controlled ovarian stimulation protocols for assisted reproduction: a network meta-analysis. Cochrane Database Syst Rev, 2025. 7(7): p. CD012586.

3. Lobo, R., et al., One-year cumulative live birth rate associated with the number of oocytes in ovarian stimulation with follitropin delta: a pooled analysis of four randomized controlled trials. Hum Reprod, 2025. 40(8): p. 1526–1534.

5. Kuan, K.K.W., S. Omoseni, and J.A. Tello, Comparing ART outcomes in women with endometriosis after GnRH agonist versus GnRH antagonist ovarian stimulation: a systematic review. Ther Adv Endocrinol Metab, 2023. 14: p. 20420188231173325.

6. Ren, J., et al., Does prolonged pituitary down-regulation with gonadotropin-releasing hormone agonist improve the live-birth rate in in vitro fertilization treatment? Fertil Steril, 2014. 102(1): p. 75–81.

7. Song, J., et al., Comparison of GnRH-a Prolonged Protocol and Short GnRH-a Long Protocol in Patients with Thin Endometrium for Assisted Reproduction: A Retrospective Cohort Study. Drug Des Devel Ther, 2020. 14: p. 3673–3682.

8. Tian, L.F., et al., Mild starting dosage ovarian stimulation combined with a modified prolonged GnRH-a protocol improved IVF/ICSI outcomes in normal ovarian responders. Arch Med Sci, 2019. 15(5): p. 1294–1300.

9. Xu, B., et al., The depot GnRH agonist protocol improves the live birth rate per fresh embryo transfer cycle, but not the cumulative live birth rate in normal responders: a randomized controlled trial and molecular mechanism study. Hum Reprod, 2020. 35(6): p. 1306–1318.

10. La Marca, A. and S.K. Sunkara, Individualization of controlled ovarian stimulation in IVF using ovarian reserve markers: from theory to practice. Hum Reprod Update, 2014. 20(1): p. 124–40.

11. Toftager, M., et al., Cumulative live birth rates after one ART cycle including all subsequent frozen-thaw cycles in 1050 women: secondary outcome of an RCT comparing GnRH-antagonist and GnRH-agonist protocols. Hum Reprod, 2017. 32(3): p. 556–567.

12. Xu, B., et al., The depot GnRH agonist protocol improves the live birth rate per fresh embryo transfer cycle, but not the cumulative live birth rate in normal responders: a randomized controlled trial and molecular mechanism study. Hum Reprod, 2020. 35(6): p. 1306–1318.

13. Toftager, M., et al., Cumulative live birth rates after one ART cycle including all subsequent frozen-thaw cycles in 1050 women: secondary outcome of an RCT comparing GnRH-antagonist and GnRH-agonist protocols. Hum Reprod, 2017. 32(3): p. 556–567.

1. Stimulation, E.G.G.o.O., et al., ESHRE guideline: ovarian stimulation for IVF/ICSI: an update in 2025dagger. Hum Reprod, 2026.

2. Melo, P., et al., Controlled ovarian stimulation protocols for assisted reproduction: a network meta-analysis. Cochrane Database Syst Rev, 2025. 7(7): p. CD012586.

3. Lobo, R., et al., One-year cumulative live birth rate associated with the number of oocytes in ovarian stimulation with follitropin delta: a pooled analysis of four randomized controlled trials. Hum Reprod, 2025. 40(8): p. 1526–1534.

5. Kuan, K.K.W., S. Omoseni, and J.A. Tello, Comparing ART outcomes in women with endometriosis after GnRH agonist versus GnRH antagonist ovarian stimulation: a systematic review. Ther Adv Endocrinol Metab, 2023. 14: p. 20420188231173325.

6. Ren, J., et al., Does prolonged pituitary down-regulation with gonadotropin-releasing hormone agonist improve the live-birth rate in in vitro fertilization treatment? Fertil Steril, 2014. 102(1): p. 75–81.

7. Song, J., et al., Comparison of GnRH-a Prolonged Protocol and Short GnRH-a Long Protocol in Patients with Thin Endometrium for Assisted Reproduction: A Retrospective Cohort Study. Drug Des Devel Ther, 2020. 14: p. 3673–3682.

8. Tian, L.F., et al., Mild starting dosage ovarian stimulation combined with a modified prolonged GnRH-a protocol improved IVF/ICSI outcomes in normal ovarian responders. Arch Med Sci, 2019. 15(5): p. 1294–1300.

9. Xu, B., et al., The depot GnRH agonist protocol improves the live birth rate per fresh embryo transfer cycle, but not the cumulative live birth rate in normal responders: a randomized controlled trial and molecular mechanism study. Hum Reprod, 2020. 35(6): p. 1306–1318.

10. La Marca, A. and S.K. Sunkara, Individualization of controlled ovarian stimulation in IVF using ovarian reserve markers: from theory to practice. Hum Reprod Update, 2014. 20(1): p. 124–40.

11. Toftager, M., et al., Cumulative live birth rates after one ART cycle including all subsequent frozen-thaw cycles in 1050 women: secondary outcome of an RCT comparing GnRH-antagonist and GnRH-agonist protocols. Hum Reprod, 2017. 32(3): p. 556–567.

12. Xu, B., et al., The depot GnRH agonist protocol improves the live birth rate per fresh embryo transfer cycle, but not the cumulative live birth rate in normal responders: a randomized controlled trial and molecular mechanism study. Hum Reprod, 2020. 35(6): p. 1306–1318.

13. Toftager, M., et al., Cumulative live birth rates after one ART cycle including all subsequent frozen-thaw cycles in 1050 women: secondary outcome of an RCT comparing GnRH-antagonist and GnRH-agonist protocols. Hum Reprod, 2017. 32(3): p. 556–567.

Stimulation, E. G. G. o. O., et al. (2026). "ESHRE guideline: ovarian stimulation for IVF/ICSI: an update in 2025dagger." Hum Reprod.

STUDY QUESTION: What is the recommended management of ovarian stimulation, based on the best available evidence in the literature? SUMMARY ANSWER: This updated ESHRE guideline on ovarian stimulation for IVF/ICSI provides 121 recommendations, answering 21 key questions on ovarian stimulation for IVF/ICSI. WHAT IS KNOWN ALREADY? Before the ESHRE guideline on ovarian stimulation for IVF/ICSI was published in 2019, ovarian stimulation for IVF/ICSI had only been discussed briefly in the National Institute for Health and Care Excellence guideline on fertility problems and in a statement by the Royal Australian and New Zealand College of Obstetricians and Gynaecologists. STUDY DESIGN, SIZE, DURATION: The guideline was developed according to the structured methodology for ESHRE guidelines. The 18 key questions from the 2019 version of the guideline were revised by the Guideline Development Group (GDG). This resulted in the addition of one new key question, the splitting of the key question on fertility preservation in three separate key questions (fertility preservation for women facing gonadotoxic treatment, elective oocyte cryopreservation, and oocyte donation) and several new interventions being added to the existing key questions. Papers published between 31 October 2018 and 2 February 2025 and written in English were included. The critical outcomes for this guideline were efficacy in terms of cumulative live birth rate per started cycle or live birth rate per started cycle, as well as safety in terms of the rate of occurrence of moderate and/or severe ovarian hyperstimulation syndrome (OHSS). PARTICIPANTS/MATERIALS, SETTING, METHODS: Based on the available evidence, recommendations were formulated and discussed until consensus was reached within the GDG. Following stakeholder review of the initial draft, the final version was approved by the GDG and ultimately by the ESHRE Executive Committee. MAIN RESULTS AND THE ROLE OF CHANCE: The guideline provides a total of 121 recommendations: 42 recommendations remained unchanged in 2019, 4 recommendations were reworded for better understanding, 29 recommendations were updated in view of new evidence, and 46 new recommendations for 2025 have been formulated. The guideline provides 4 recommendations on pre-stimulation evaluation, 7 recommendations on pre-treatment therapies, 50 recommendations on pituitary suppression and ovarian stimulation, 17 recommendations on monitoring, 18 recommendations on triggering of final oocyte maturation and luteal support, and 8 recommendations on the prevention of OHSS. In addition, the guideline provides 17 recommendations on fertility preservation, both oncologic and elective, and oocyte donation. These include 90 evidence-based recommendations, of which only 42 were formulated as strong recommendations and 48 as conditional, as well as 29 good practice points and 2 research-only recommendations. Of the evidence-based recommendations, none were supported by high-quality evidence, 6 by moderate-quality evidence, 36 by low-quality evidence, and 148 by very low-quality evidence. To support future research on ovarian stimulation for IVF/ICSI, a list of research recommendations was provided. LIMITATIONS, REASONS FOR CAUTION: Several newer interventions are not well studied yet. For most of these interventions, a recommendation against the intervention or a research-only recommendation was formulated based on insufficient evidence. Future studies may require these recommendations to be revised. WIDER IMPLICATIONS OF THE FINDINGS: The guideline provides clinicians with clear advice on best practice in ovarian stimulation, based on the best evidence available. In addition, a list of research recommendations is provided to promote further studies in ovarian stimulation. STUDY FUNDING/COMPETING INTEREST(S): The guideline was developed by ESHRE, who funded the guideline meetings, literature searches, and dissemination of the guideline. The guideline group members did not receive any financial incentives; all work was provided voluntarily. BA reports speaker's fees from Gedeon-Richter, Ferring, IBSA, Intas, Merck, Organon, consulting fees from Merck, Organon, Oxolife, stock options from Global Fertility Solutions LLC (employee co-investment), and was chair of the Turkish Society of Reproductive Medicine. EB reports research grants from Roche Diagnostics and IBSA, consulting fees from MSD, Abbot, Gedeon-Richter, Roche, speaker's fees from IBSA, MSD, Ferring Pharmaceuticals, Abbot, Gedeon-Richter, Merck, Roche, participation in the advisory board of Ferring Pharmaceuticals, IBSA and Merck, and ownership interest from IVI-RMS Valencia. GG was part of the ESHRE working group on Recurrent Implantation Failure and the ESHRE working group on clinical KPISs, reports travel support from Merck, Organon, Ferring, Theramex, Gedeon-Richter, Abbott, consulting fees from Organon, Ferring, Merck, Gedeon-Richter, Theramex, Abbott, ReproNovo, Igyxos, OxoLife, Philipps, ReprodWissen, PregLem, Guerbet, Roche, IBSA, and Besins, speaker's fees from Organon, Ferring, Merck, Gedeon-Richter, Theramex, Abbott, ReproNovo, Igyxos, OxoLife, Philipps, ReprodWissen, PregLem, Guerbet, Roche, IBSA, and Besins, and research grants from Besin, Merck, Abbott, Ferring, Theramex. MG reports speaker's fees from Merck Serono, Ferring, and Gedeon Richter. EK reports travel/hotel expenses from Ferring, Merck SERONO, Vianex, speaker's fees from Ferring, Merck SERONO, Vianex, and is chair of the Greek Society of Fertility and Sterility. MK reports travel support and speaker's fees from Ferring. ALM reports research grants from Merck, Ferring, IBSA, Roche, Organon, Theramex, Beckman Coulter, and Gedeon-Richter, consulting fees from Merck, Ferring, IBSA, Roche, Organon, Theramex, Beckman Coulter, and Gedeon-Richter, speaker's fees from Merck, Ferring, IBSA, Roche, Organon, Theramex, Beckman Coulter, Gedeon-Richter, and participation on an advisory board of Merck, Organon, Ferring, Theramex, Gedeon Richter, and IBSA. GL reports consulting fees from Ferring and Merck, speaker's fees from Ferring, Merck, Gedeon-Richter, Organon, and Vianex, expert testimony fees from Cook, travel support from ESHRE, Ferring, Merck, Gedeon-Richter, Organon, and Vianex, is on the advisory board of Merck and Ferring, and participated in an ESHRE committee and on the Greek Fertility and Sterility Committee. NM reports research grants from IBSA, Organon, consulting fees from Organon, Merck, GE, Ferring, Abbott, and Cooper, and speaker's fees from Ferring, GE, Organon, IBSA, Merck, Theramex. NPP reports research grants from Besins Healthcare, Ferring Pharmaceutical, Merck Serono, Organon, Roche Diagnostics, and Theramex, consulting fees from Besins Healthcare, Alife, Ferring, IBSA, Merck Serono, Organon, Abbott, FertilAI, and speaker's fees from Besins Healthcare, Roche Diagnostics, Ferring Pharmaceuticals, Gedeon-Richter, IBSA, Merck Serono, Organon, and Theramex. SKS reports a research grant from Ferring, travel support from Merck and INTAS, consulting fees from Merck, and speaker's fees from Merck, MSD, INTAS, and Ferring. TT reports travel support from Merck, speaker's fees from Merck, Organon, MSD and is editor-in-chief of a Bulgarian journal, Reproductive Health. MT reports travel support from IBSA, Ferring, and Merck, consulting fees from Abbott and is a member of the board of the Finnish Endocrine Society. JU is a member of the Steering Committee of Richter Reproduction Network and received travel support from IBSA. FB reports a research grant from Besins, is on the advisory board of Merck and Abbott, reports speaker's fees from Ferring, Merck, Besins, Intas Fermaceuticals, PREIS School; he is the owner of FRANKSCHOOL RforL. The other authors have nothing to disclose. TRIAL REGISTRATION NUMBER: N/A. DISCLAIMER: This guideline represents the views of ESHRE, which were achieved after careful consideration of the scientific evidence available at the time of preparation. In the absence of scientific evidence on certain aspects, a consensus between the relevant ESHRE stakeholders has been obtained.Adherence to these clinical practice guidelines does not guarantee a successful or specific outcome, nor does it establish a standard of care. Clinical practice guidelines do not replace the need for application of clinical judgment to each individual presentation, nor variations based on locality and facility type.ESHRE makes no warranty, express or implied, regarding the clinical practice guidelines and specifically excludes any warranties of merchantability and fitness for a particular use or purpose. (The full disclaimer is available at www.eshre.eu/guidelines.).

Melo, P., et al. (2025). "Controlled ovarian stimulation protocols for assisted reproduction: a network meta-analysis." Cochrane Database Syst Rev 7(7): CD012586.

BACKGROUND: Controlled ovarian stimulation (COS) is an essential step in most assisted conception cycles. Different treatment combinations (termed protocols) exist in COS, yet there is no consensus on their relative effectiveness and safety. OBJECTIVES: We aimed to assess the relative effectiveness and safety of COS protocols in clinical practice. SEARCH METHODS: We followed standard Cochrane methodology to conduct extensive electronic searches to 11 June 2024. SELECTION CRITERIA: We included randomised controlled trials (RCTs) comparing at least two COS protocols using any form of pituitary suppression (gonadotrophin-releasing hormone (GnRH) agonists, antagonists or progestogens) and human menopausal gonadotropin (hMG), urinary or recombinant follicle-stimulating hormone (u/rFSH), with or without luteinising hormone (LH) and/or oral medications (e.g. clomifene or letrozole), for ovarian stimulation. The primary outcomes were the rates of live birth or ongoing pregnancy (LBR or OPR) and ovarian hyperstimulation syndrome (OHSS) per participant after one stimulation cycle. The secondary outcomes were the rates of clinical pregnancy, miscarriage, multiple pregnancy, ectopic pregnancy and cycle cancellation per participant, and the number of oocytes, cleavage-stage embryos, blastocyst-stage embryos and cryopreserved embryos per participant. DATA COLLECTION AND ANALYSIS: Two review authors independently selected studies and extracted data. We conducted pairwise and network meta-analyses (NMA) according to participants' predicted response to COS (normal/unselected, high or low). For each outcome and subgroup of women, we grouped treatment protocols into the following different networks: all pituitary suppression methods; all long GnRH agonist protocols; all short GnRH antagonist protocols; all GnRH agonist flare protocols; all protocols using progestogens for pituitary suppression; and all protocols using ovarian stimulation in the absence of pituitary suppression. Using the Cochrane RoB 1 tool, we restricted our primary analyses to RCTs at low risk of 'selection' and 'other' biases. We presented effect estimates as risk ratios (RR) for dichotomous outcomes, or mean difference (MD) for continuous outcomes, with 95% confidence intervals (CI). We used Review Manager and Stata 18 for the meta-analyses. MAIN RESULTS: We included 338 studies investigating a total of 15 pairwise comparisons between different COS protocols in 59,086 women. Of these, 226 trials included only women with predicted normal response or whose predicted response was unstated, 31 trials included only women with predicted high response and 81 trials included only women with predicted low response. Primary outcome (effectiveness) - LBR or OPR per woman randomised Pituitary suppression methods In women with predicted normal response, short antagonist protocols probably result in little to no difference in LBR or OPR versus long agonist protocols (RR 0.95, 95% CI 0.84 to 1.07; 8 studies, 2817 women; I(2) = 0%; moderate-certainty evidence). Network evidence also suggested that ovarian stimulation without pituitary suppression may reduce the LBR or OPR compared with short GnRH antagonist protocols (RR 0.71, 95% CI 0.57 to 0.90; low-certainty evidence) and with GnRH agonist flare protocols (RR 0.52, 95% CI 0.36 to 0.75; low-certainty evidence). Primary outcome (safety) - OHSS per woman randomised Pituitary suppression methods In women with predicted normal response, short GnRH antagonist protocols may reduce OHSS compared with long GnRH agonist protocols (RR 0.88, 95% CI 0.78 to 0.99; 7 studies, 2650 women; I(2) = 0%; low-certainty evidence). Short GnRH antagonist protocols In women with predicted high response receiving short GnRH antagonist protocols, hMG may reduce OHSS compared with rFSH (RR 0.45, 95% CI 0.3 to 0.68; 1 study, 619 women; low-certainty evidence). Secondary outcomes Clinical pregnancy Pituitary suppression methods In women with predicted normal response, network evidence suggested that ovarian stimulation without pituitary suppression lowers the clinical pregnancy rate compared with short GnRH antagonist protocols (RR 0.76, 95% CI 0.61 to 0.93; low-certainty evidence) and with GnRH agonist flare protocols (RR 0.60, 95% CI 0.44 to 0.82; low-certainty evidence). Cancellation Short GnRH antagonist protocols In women with predicted high response undergoing short GnRH antagonist protocols, hMG may increase cancellation compared with rFSH (RR 5.98, 95% CI 1.78 to 20.10; 1 study, 619 women; low-certainty evidence). For the remaining networks and participant subgroups (normal- and low-responding women), the evidence did not confidently identify differences between COS protocols and is not reported in the abstract. Oocyte number Pituitary suppression methods In women with predicted normal response, short GnRH antagonist protocols (MD -0.75, 95% CI -1.49 to -0.02; 17 studies, 4062 women; I(2) = 94%; low-certainty evidence), GnRH agonist flare protocols (MD -3.30, 95% CI -4.87 to -1.73; 1 study, 240 women; I(2) = 96%; low-certainty evidence) and protocols without pituitary suppression (MD -5.80, 95% CI -11.24 to -0.36; 2 studies, 714 women; low-certainty evidence) may lower the oocyte number compared with long GnRH agonist protocols, respectively. In women with predicted low response, short GnRH antagonist protocols may reduce the oocyte number versus long agonist protocols (MD -1.25, 95% CI -2.01 to -0.50; low-certainty evidence). Long GnRH agonist protocols In women with predicted normal response receiving long GnRH agonist protocols, combining rFSH and rLH reduces the oocyte number compared with rFSH alone (MD -0.81, 95% CI -1.33 to -0.28; 6 trials, 1289 women; I(2) = 0%; high-certainty evidence). Remaining evidence For the remaining networks, patient subgroups and secondary outcomes, the evidence did not confidently identify differences between COS protocols. AUTHORS' CONCLUSIONS: Short GnRH antagonist protocols may reduce OHSS rates in women with predicted normal response without compromising LBR or OPR. Ovarian stimulation without pituitary suppression may reduce the LBR or OPR compared with short GnRH antagonist protocols and with GnRH agonist flare protocols. In women with predicted high response receiving short GnRH antagonist protocols, hMG may reduce OHSS compared with rFSH. We were unable to meta-analyse results from 169 trials due to serious risk of selection or other biases, a lack of outcome data, or because of data reported in an unsuitable format for meta-analysis (e.g. per cycle); this led to underpowered analyses for several outcomes and pairwise comparisons. Future trials should focus on evaluating the effect of different COS protocols upon cumulative live birth rates, accounting for all embryo transfers (fresh and/or frozen) after a single stimulation cycle per participant.

Lobo, R., et al. (2025). "One-year cumulative live birth rate associated with the number of oocytes in ovarian stimulation with follitropin delta: a pooled analysis of four randomized controlled trials." Hum Reprod 40(8): 1526–1534.

STUDY QUESTION: What number of oocytes retrieved is associated with the highest cumulative live birth rates (CLBRs) in the fresh and subsequent frozen cycles following ovarian stimulation with follitropin delta? SUMMARY ANSWER: The CLBR increased with the number of oocytes retrieved, plateauing at 21-25 oocytes. WHAT IS KNOWN ALREADY: Live birth rate (LBR) per fresh cycle is the conventionally reported outcome of IVF; however, the marked increase in cryopreserved cycles in recent years suggests that the CLBR has emerged as a more relevant outcome. In the fresh cycle, the number of oocytes retrieved is regarded as a prognostic factor for LBR, and a similar association has been shown for CLBR. STUDY DESIGN, SIZE, DURATION: Pooled analysis including 1746 patients from four randomized controlled trials. Trials were identified from clinical trials available in the Ferring Pharmaceuticals database up to June 2023. Selected trials used follitropin delta for ovarian stimulation and collected outcome data from both fresh and frozen cycles. Follitropin delta dose-response trials, as well as trials investigating follitropin delta in repeated ovarian stimulation cycles, were excluded. Patients included in the analysis underwent ovarian stimulation with follitropin delta and had at least one oocyte retrieved. The outcome of CLBR in the fresh and subsequent frozen cycles was evaluated in relation to the number of oocytes retrieved. CLBR was calculated as the number of patients with at least one live birth divided by the number of all patients included in the analysis. PARTICIPANTS/MATERIALS, SETTING, METHODS: Trial participants were women, 18-42 years of age, who were undergoing their first or second IVF/ICSI cycle in a GnRH antagonist/agonist protocol. Triggering was performed with hCG or GnRH agonist, and insemination was performed by IVF or ICSI. Single or double blastocyst transfer was performed on Day 5 in the fresh cycle, and all viable surplus blastocysts were cryopreserved on Day 5 or Day 6. All pregnancies from the fresh cycle and frozen cycles initiated within 1 year after the start of stimulation were followed until birth. The association between the number of oocytes retrieved and CLBR was assessed using a logistic regression analysis with fractional polynomials to obtain predicted CLBR. Subgroup analyses were performed based on age, anti-Mullerian hormone (AMH), and number of oocytes retrieved. MAIN RESULTS AND THE ROLE OF CHANCE: Overall, 15 trials with follitropin delta were identified in the database. Of those, 11 trials were not eligible, and the remaining 4 trials were included. In total, 1746 patients were included in the analysis. The mean age was 33.8 years (range 21-42 years), and the median AMH level was 17.0 pmol/l (range 0.3-164.2 pmol/l). The vast majority of patients (1645 patients, 94.2%) were treated with a GnRH antagonist protocol, while 101 patients (5.8%) were treated with a GnRH agonist protocol. Overall, 1541 patients (88.3%) received hCG triggering, and 205 patients (11.7%) received GnRH agonist triggering. Frozen cycles (maximum of six) were initiated by 740 patients (42.4%). The study population underwent a total of 2948 cycles: 1746 fresh cycles (referring to ovarian stimulation cycles, with or without transfer) and 1202 frozen cycles (initiated cycles, with or without transfer). The mean number of oocytes retrieved was 12.4 (range 1-72), the fresh cycle LBR was 29.1%, and the CLBR was 51.4%. The CLBR increased with the number of oocytes retrieved up to a plateau starting at 21-25 oocytes. The CLBR reached above 60% at >15 oocytes and above 70% at >20 oocytes. The CLBR decreased with increasing age (57.1%, 51.6%, and 35.8% at <35, 35-37, and >/=38 years), while it was similar for AMH <15 and >/=15 pmol/l (52.0% and 50.9%, respectively). A continued increase in predicted CLBR from 15 oocytes retrieved was observed in older patients (>/=38 years); from 41.3% to 53.4% to 58.7% at 15-19, 20-24, and >/=25 oocytes. No equivalent benefit was observed in younger patients (<38 years), where corresponding rates were 72.5%, 68.0%, and 78.8% in patients <35 years and 70.3%, 73.1%, and 71.5% in patients 35-37 years. The fresh cycle LBR decreased beyond 14 oocytes, while the CLBR continued to increase by the number of oocytes retrieved. LIMITATIONS, REASONS FOR CAUTION: A limited number of patients included in the analysis had >/=20 oocytes retrieved (249 patients, 14.3%). WIDER IMPLICATIONS OF THE FINDINGS: This analysis suggests an increase in CLBR with the number of oocytes retrieved up to a plateau starting at 21-25 oocytes following ovarian stimulation cycles with follitropin delta and subsequent frozen cycles. An increase in CLBR from 20 oocytes was evident in older but not in younger patients. STUDY FUNDING/COMPETING INTEREST(S): The study was funded by Ferring Pharmaceuticals A/S, Copenhagen, Denmark. S.S.-R. has received research funding from Organon/MSD, Theramex, and Gedeon-Richter, consulting fees from Organon/MSD, Ferring Pharmaceuticals, Merck Serono, and IBSA, payment or honoraria from Organon/MSD, Besins and Gedeon-Richter, support for attending meetings from Gedeon-Richter and Besins, is an advisory board member for TTRANSPORT and Deputy of the ESHRE SQART SIG, and owns stocks of IVI Lisboa, Clinica de Reproducao assistida Lda. A.P. has received grants from Cryos, grants and payments from Gedeon Richter, Ferring Pharmaceuticals and Merck A/S, payments from Organon, consulting fees from IBSA, Ferring Pharmaceuticals, Gedeon Richter, Cryos, and Merck A/S, and travel support from Gedeon Richter. N.S.M. has received speaker and consultancy fees from Ferring Pharmaceuticals, IBSA, Merck, Freya, and Gedeon Richter, and is a shareholder in Verso Biosense. K.M. has been a scientific advisor for Calla Lily Clinical Care, Evvy, and AutoIVF. R.L., A.F., K.M., and I.E.J. are employees of Ferring Pharmaceuticals. REGISTRATION NUMBER: N/A.

Kuan, K. K. W., et al. (2023). "Comparing ART outcomes in women with endometriosis after GnRH agonist versus GnRH antagonist ovarian stimulation: a systematic review." Ther Adv Endocrinol Metab 14: 20420188231173325.

BACKGROUND: Endometriosis is an oestrogen-dependent disease that can cause subfertility in women who may require assisted reproductive technology (ART) to achieve their pregnancy goals. OBJECTIVES: The aim of this study was to compare ART outcomes in women with endometriosis following the long GnRH-agonist controlled ovarian stimulation (COS) protocol with those taking the GnRH-antagonist COS protocol. DATA SOURCES AND METHODS: MEDLINE, Embase and Web of Science were systematically searched in June 2022. Randomized controlled trials (RCTs) and observational studies comparing the long GnRH-agonist COS protocol and the GnRH-antagonist COS protocol in women with all stages/subtypes of endometriosis were included. Data were synthesized into comprehensive tables for systematic review. The Scottish Intercollegiate Guidelines Network (SIGN) checklists were used for the risk of bias assessment of non-randomized studies and randomized studies, and all the included studies were deemed to have acceptable quality. MAIN RESULTS: Eight studies (one RCT and seven observational) with 2695 patients (2761 cycles) were included. Most studies generally reported non-significant differences in clinical pregnancy or live birth rates regardless of the COS protocol used. However, the GnRH-agonist protocol may yield a higher total number of oocytes retrieved, especially mature oocytes. Conversely, the GnRH-antagonist protocol required a shorter COS duration and lower gonadotrophin dose. Adverse outcomes, such as rates of cycle cancellation and miscarriage, were similar between both COS protocols. CONCLUSION: Both the long GnRH-agonist and GnRH-antagonist COS protocols generally yield similar pregnancy outcomes. However, the long GnRH-agonist protocol may be associated with a higher cumulative pregnancy rate due to the higher number of retrieved oocytes available for cryopreservation. The underlying mechanisms of the two COS protocols on the female reproductive tract remain unclear. Clinicians should consider treatment costs, stage/subtype of endometriosis and pregnancy goals of their patients when selecting a GnRH analogue for COS. A well-powered RCT is needed to minimize the risk of bias and compare the risk for ovarian hyperstimulation syndrome. REGISTRATION: This review was prospectively registered at PROSPERO under Registration No. CRD42022327604.

Ren, J., et al. (2014). "Does prolonged pituitary down-regulation with gonadotropin-releasing hormone agonist improve the live-birth rate in in vitro fertilization treatment?" Fertil Steril 102(1): 75–81.

OBJECTIVE: To evaluate the effects of a prolonged duration of gonadotropin-releasing hormone agonist (GnRH-a) in pituitary down-regulation for controlled ovarian hyperstimulation (COH) on the live-birth rate in nonendometriotic women undergoing in vitro fertilization and embryo transfer (IVF-ET). DESIGN: Retrospective cohort study. SETTING: University-affiliated hospital. PATIENT(S): Normogonadotropic women undergoing IVF. INTERVENTION(S): Three hundred seventy-eight patients receiving a prolonged pituitary down-regulation with GnRH-a before ovarian stimulation and 422 patients receiving a GnRH-a long protocol. MAIN OUTCOME MEASURE(S): Live-birth rate per fresh ET. RESULT(S): In comparison with the long protocol, the prolonged down-regulation protocol required a higher total dose of gonadotropins. A lower serum luteinizing hormone (LH) level on the starting day of gonadotropin and the day of human chorionic gonadotropin (hCG) and a fewer number of oocytes and embryos were observed in the prolonged down-regulation protocol. However, the duration of stimulation and number of high-quality embryos were comparable between the two groups. A statistically significantly higher implantation rate (50.27% vs. 39.69%), clinical pregnancy rate (64.02% vs. 56.87%) and live-birth rate per fresh transfer cycle (55.56% vs. 45.73%) were observed in the prolonged protocol. CONCLUSION(S): Prolonged down-regulation in a GnRH-a protocol might increase the live-birth rates in normogonadotropic women.

Song, J., et al. (2020). "Comparison of GnRH-a Prolonged Protocol and Short GnRH-a Long Protocol in Patients with Thin Endometrium for Assisted Reproduction: A Retrospective Cohort Study." Drug Des Devel Ther 14: 3673–3682.

PURPOSE: Gonadotrophin releasing hormone agonist (GnRH-a) is widely used for pituitary down-regulation and recruiting more follicles in assisted reproduction. However, no information is available on its value for patients with thin endometrial thickness. PATIENTS AND METHODS: This was a retrospective cohort study of 302 patients with endometrium <8 mm undergoing fresh embryo transfer at a fertility center of a university hospital from January 2016 and December 2018. In 148 cycles of the GnRH-a prolonged protocol, one depot of 3.75 mg GnRH-a was injected on day 2 of the menstrual cycle, while in 154 cycles of the short GnRH-a long protocol, 0.1 mg of GnRH-a was injected daily from the mid-luteal phase. The live birth rate and clinical pregnancy rate were compared between the two groups. Other outcome measures included the implantation rate, miscarriage rate, and characteristics of stimulation procedures. RESULTS: Live birth rates and clinical pregnancy rates were significantly higher in the GnRH-a prolonged protocol group than in the other group (36.5% vs 20.8%, P=0.002; 43.9% vs 28.2%, P=0.006, respectively). The live birth rate was significantly increased in the prolonged protocol group (crude OR: 2.190, 95% CI: 1.311, 3.660; adjusted OR: 2.458, 95% CI: 1.430, 4.224) compared with that in the reference group. The implantation rate of the former group was also significantly higher than that of the latter group (35.4% vs 15.9%, P=0.000). There was no significant difference in miscarriage rates between the two protocols. In terms of stimulation procedures, the GnRH-a prolonged protocol group required significantly higher Gn time (10.9 vs 9.5 days, P=0.000) and Gn consumption (2625.0 vs 2047.5 IU, P=0.000) than the short GnRH-a long protocol group. CONCLUSION: The GnRH-a prolonged protocol in fresh embryo transfer cycles yielded better clinical outcomes of patients with thin endometrium than the short GnRH-a long protocol.

Tian, L. F., et al. (2019). "Mild starting dosage ovarian stimulation combined with a modified prolonged GnRH-a protocol improved IVF/ICSI outcomes in normal ovarian responders." Arch Med Sci 15(5): 1294–1300.

INTRODUCTION: Controlled ovarian hyperstimulation (COH) is essential for artificial reproduction technology (ART). This study aimed to evaluate the effects of a mild starting dosage of r-FSH ovarian stimulation after the modified prolonged GnRH-a down-regulation protocol for COH on the clinical outcomes in normal ovarian responders undergoing in vitro fertilization/intracytoplasmic sperm injection-embryo transfer (IVF/ICSI-ET). MATERIAL AND METHODS: In the retrospective study, the patients were separated into two groups according to the starting dosage of r-FSH: a mild dosage group (75 IU </= r-FSH < 150 IU, n = 858) and a conventional dosage group (150 IU </= r-FSH </= 225 IU, n = 535). Data were collected from clinical records. The baseline characteristics and clinical outcomes were compared between the two groups. RESULTS: Although the duration of r-FSH treatment was a little longer in the mild dosage group, the total r-FSH dosage and the cost of ovarian stimulation were significantly lower than those in the conventional dosage group. Furthermore, compared to the conventional dosage group, the number of retrieved oocytes was also lower in the mild dosage group, whereas the rates of two pronuclei (2PN) fertilized oocytes and good-quality embryos were remarkable higher. The implantation rate, clinical pregnancy rate and live birth rate were significantly higher in the mild dosage group. There was no difference in early miscarriages rate, incidence of moderate and severe ovarian hyper-stimulation syndrome (OHSS) or incidence of ectopic pregnancy between the two groups. CONCLUSIONS: The modified prolonged GnRH-a pituitary down-regulation regimen combined with mild r-FSH starting dosage improved IVF/ICSI outcomes and reduced the financial cost in normal ovarian responders.

Xu, B., et al. (2020). "The depot GnRH agonist protocol improves the live birth rate per fresh embryo transfer cycle, but not the cumulative live birth rate in normal responders: a randomized controlled trial and molecular mechanism study." Hum Reprod 35(6): 1306–1318.

STUDY QUESTION: Do cumulative live birth rates (CLBRs) after one complete ART cycle differ between the three commonly used controlled ovarian stimulation (COS) protocols (GnRH antagonist, depot GnRHa (GnRH agonist) and long GnRHa) in normal responders undergoing IVF/ICSI? SUMMARY ANSWER: There were similar CLBRs between the GnRH antagonist, depot GnRHa and long GnRHa protocols. WHAT IS KNOWN ALREADY: There is no consensus on which COS protocol is the most optimal in women with normal ovarian response. The CLBR provides the final success rate after one complete ART cycle, including the fresh and all subsequent frozen-thawed embryo transfer (ET) cycles. We suggest that the CLBR measure would allow for better comparisons between the different treatment protocols. STUDY DESIGN, SIZE, DURATION: A prospective controlled, randomized, open label trial was performed between May 2016 and May 2017. A total of 819 patients were allocated to the GnRH antagonist, depot GnRHa or long GnRHa protocol in a 1:1:1 ratio. The minimum follow-up time from the first IVF cycle was 2 years. To further investigate the potential effect of COS with the GnRH antagonist, depot GnRHa or long GnRHa protocol on endometrial receptivity, the expression of homeobox A10 (HOXA10), myeloid ecotropic viral integration site 1 (MEIS1) and leukemia inhibitory factor (LIF) endometrial receptivity markers was evaluated in endometrial tissue from patients treated with the different COS protocols. PARTICIPANTS/MATERIALS, SETTING, METHODS: Infertile women with normal ovarian response (n = 819) undergoing IVF/ICSI treatment were randomized to the GnRH antagonist, depot GnRHa or long GnRHa protocol. Both IVF and ICSI cycles were included, and the sperm samples used were either fresh or frozen partner ejaculates or frozen donor ejaculates. The primary outcome was the live birth rate (LBR) per fresh ET cycle, and the CLBR after one complete ART cycle, until the birth of a first child (after 28 weeks) or until all frozen embryos were used, whichever occurred first. Pipelle endometrial biopsies from 34 female patients were obtained on Days 7-8 after oocyte retrieval or spontaneous ovulation in natural cycles, respectively, and HOXA10, MEIS1 and LIF mRNA and protein expression levels in the human endometrium was determined by quantitative real-time PCR and western blot, respectively. MAIN RESULTS AND THE ROLE OF CHANCE: There were no significant differences in CLBRs between the GnRH antagonist, depot GnRHa or long GnRHa protocol (71.4 versus 75.5 versus 72.2%, respectively). However, there was a significantly higher LBR per fresh ET cycle in the depot GnRHa protocol than in the long GnRHa and GnRH antagonist protocols (62.6 versus 52.1% versus 45.6%, P < 0.05). Furthermore, HOXA10, MEIS1 and LIF mRNA and protein expression in endometrium all showed significantly higher in the depot GnRHa protocol than in the long GnRHa and GnRH antagonist protocols (P < 0.05). LIMITATIONS, REASONS FOR CAUTION: A limitation of our study was that both our clinicians and patients were not blinded to the randomization for the randomized controlled trial (RCT). An inclusion criterion for the current retrospective cohort study was based on the 'actual ovarian response' during COS treatment, while the included population for the RCT was 'expected normal responders' based on maternal age and ovarian reserve test. In addition, the analysis was restricted to patients under 40 years of age undergoing their first IVF cycle. Furthermore, the endometrial tissue was collected from patients who cancelled the fresh ET, which may include some patients at risk for ovarian hyperstimulation syndrome, however only patients with 4-19 oocytes retrieved were included in the molecular study. WIDER IMPLICATIONS OF THE FINDINGS: The depot GnRH agonist protocol improves the live birth rate per fresh ET cycle, but not the cumulative live birth rate in normal responders. A possible explanation for the improved LBR after fresh ET in the depot GnRHa protocol could be molecular signalling at the level of endometrial receptivity. STUDY FUNDING/COMPETING INTEREST(S): This project was funded by Grant 81571439 from the National Natural Sciences Foundation of China and Grant 2016YFC1000206-5 from the National Key Research & Development Program of China. The authors declare no conflict of interest. TRIAL REGISTRATION NUMBER: The RCT trial was registered at the Chinese Clinical Trial Registry, Study Number: ChiCTR-INR-16008220. TRIAL REGISTRATION DATE: 5 April 2016. DATE OF FIRST PATIENT'S ENROLLMENT: 12 May 2016.

La Marca, A. and S. K. Sunkara (2014). "Individualization of controlled ovarian stimulation in IVF using ovarian reserve markers: from theory to practice." Hum Reprod Update 20(1): 124–140.

BACKGROUND: The main objective of individualization of treatment in IVF is to offer every single woman the best treatment tailored to her own unique characteristics, thus maximizing the chances of pregnancy and eliminating the iatrogenic and avoidable risks resulting from ovarian stimulation. Personalization of treatment in IVF should be based on the prediction of ovarian response for every individual. The starting point is to identify if a woman is likely to have a normal, poor or a hyper response and choose the ideal treatment protocol tailored to this prediction. The objective of this review is to summarize the predictive ability of ovarian reserve markers, such as antral follicle count (AFC) and anti-Mullerian hormone (AMH), and the therapeutic strategies that have been proposed in IVF after this prediction. METHODS: A systematic review of the existing literature was performed by searching Medline, EMBASE, Cochrane library and Web of Science for publications in the English language related to AFC, AMH and their incorporation into controlled ovarian stimulation (COS) protocols in IVF. Literature available to May 2013 was included. RESULTS: The search generated 305 citations of which 41 and 25 studies, respectively, reporting the ability of AMH and AFC to predict response to COS were included in this review. The literature review demonstrated that AFC and AMH, the most sensitive markers of ovarian reserve identified to date, are ideal in planning personalized COS protocols. These sensitive markers permit prediction of the whole spectrum of ovarian response with reliable accuracy and clinicians may use either of the two markers as they can be considered interchangeable. Following the categorization of expected ovarian response to stimulation clinicians can adopt tailored therapeutic strategies for each patient. Current scientific trend suggests the elective use of the GnRH antagonist based regimen for hyper-responders, and probably also poor responders, as likely to be beneficial. The selection of the appropriate and individualized gonadotrophin dose is also of paramount importance for effective COS and subsequent IVF outcomes. CONCLUSION: Personalized IVF offers several benefits; it enables clinicians to give women more accurate information on their prognosis thus facilitating counselling especially in cases of extremes of ovarian response. The deployment of therapeutic strategies based on selective use of GnRH analogues and the fine tuning of the gonadotrophin dose on the basis of potential ovarian response in every single woman can allow for a safer and more effective IVF practice.

Toftager, M., et al. (2017). "Cumulative live birth rates after one ART cycle including all subsequent frozen-thaw cycles in 1050 women: secondary outcome of an RCT comparing GnRH-antagonist and GnRH-agonist protocols." Hum Reprod 32(3): 556–567.

STUDY QUESTION: Are cumulative live birth rates (CLBRs) similar in GnRH-antagonist and GnRH-agonist protocols for the first ART cycle including all subsequent frozen-thaw cycles from the same oocyte retrieval? SUMMARY ANSWER: The chances of at least one live birth following utilization of all fresh and frozen embryos after the first ART cycle are similar in GnRH-antagonist and GnRH-agonist protocols. WHAT IS KNOWN ALREADY: Reproductive outcomes of ART treatment are traditionally reported as pregnancies per cycle or per embryo transfer. However, the primary concern is the overall chance of a live birth. After the first ART cycle with fresh embryo transfer, we found live birth rates (LBRs) of 22.8% and 23.8% (P = 0.70) for the GnRH-antagonist and GnRH-agonist protocols, respectively. But with CLBRs including both fresh and frozen embryos from the first oocyte retrieval, chances of at least one live birth increases. There are no previous randomized controlled trials (RCTs) comparing CLBRs in GnRH-antagonist versus GnRH-agonist protocols. Previous studies on CLBR are either retrospective cohort studies including multiple fresh cycles or RCTs comparing single embryo transfer (SET) with double embryo transfer (DET). STUDY DESIGN, SIZE, DURATION: CLBR was a secondary outcome in a Phase IV, dual-center, open-label, RCT including 1050 women allocated to a short GnRH-antagonist or a long GnRH-agonist protocol in a 1:1 ratio over a 5-year period using a web-based concealed randomization code. The minimum follow-up time from the first IVF cycle was 2 years. The aim was to compare CLBR between the two groups following utilization of all fresh and frozen embryos from the first ART cycle. PARTICIPANTS/MATERIALS, SETTING, METHODS: All women referred for their first ART cycle at two public fertility clinics, <40 years of age were approached. A total of 1050 subjects were allocated to treatment and 1023 women started standardized ART protocols with recombinant human follitropin-beta (rFSH) stimulation. Day-2 SET was planned and additional embryos were frozen and used in subsequent frozen-thawed cycles. All pregnancies generated from oocyte retrieval during the first IVF cycle including fresh and frozen-thaw cycles were registered. Ongoing pregnancy was determined by ultrasonography at gestational week 7-9 and live birth was irrespective of the duration of gestation. CLBR was defined as at least one live birth per allocated woman after fresh and frozen cycles. Subjects were censored out after the first live birth. Cox proportional hazard model was used to evaluate the relative prognostic significance of female age, BMI, the number of retrieved oocytes and the diagnosis of infertility in relation to the CLBR. MAIN RESULTS AND THE ROLE OF CHANCE: Baseline characteristics were similar and equal proportions of patients continued with frozen-thaw (frozen embryo transfer, FET) cycles after their fresh ART cycle in the GnRH-antagonist and GnRH-agonist arms. When combining all fresh and frozen-thaw embryo transfers from first oocyte retrieval with a minimum of 2-year follow-up, the CLBR was 34.1% (182/534) in the GnRH-antagonist group versus 31.2% (161/516) in the GnRH-agonist group (odds ratio (OR):1.14; 95% CI: 0.88-1.48, P = 0.32). Mean time to the first live birth was 11.0 months in the GnRH-antagonist group compared to 11.5 months in the GnRH-agonist group (P < 0.01). The total number of deliveries from all FET cycles where embryos were thawed were higher in the antagonist group 64/330 (19.4%) compared to the agonist group 43/355 (12.1%) ((OR): 1.74; 95% CI: 1.14-2.66, P = 0.01). The evaluation of prognostic factors showed that more retrieved oocytes were associated with a significantly higher CLBR in both treatment groups. For the subgroup of obese women (BMI >30 kg/m2), the CLBR was significantly higher in the GnRH-antagonist group (P = 0.02). LIMITATIONS, REASONS FOR CAUTION: The duration of the trial is a possible limitation with introduction of new methods as 'Freeze all' and 'GnRH-agonist triggering', but as these treatments were used in only few women, a systematic bias is not likely. Blastocyst culture of surplus embryos for freezing was introduced to both groups simultaneously, thereby minimizing the risk of bias. Furthermore, with a minimum of 2-year follow-up, a minority (<1%) still had cryopreserved embryos and no live birth at the end of the trial. The post hoc prognostic covariate analyses with multiple strata should be interpreted with caution. Finally, the physicians were not blinded to GnRH treatment group after randomization. WIDER IMPLICATIONS OF THE FINDINGS: With the improvement of embryo culture, freezing and thawing methods as well as a strategy of elective SET, CLBR until first live birth provides an all-inclusive success rate for ART. When comparing GnRH-antagonist and GnRH-agonist protocols, we find similar CLBRs, despite more oocytes being retrieved in the GnRH-agonist protocol. STUDY FUNDING/COMPETING INTERESTS: An unrestricted research grant is funded by Merck Sharp & Dohme Corp., a subsidiary of Merck & Co., Inc., Kenilworth, NJ, USA (MSD). The funders had no influence on the data collection, analyses or conclusions of the study. No conflict of interests to declare. TRIAL REGISTRATION NUMBER: EudraCT #: 2008-005452-24. ClinicalTrial.gov: NCT00756028. TRIAL REGISTRATION DATE: 18 September 2008. DATE OF FIRST PATIENT'S ENROLLMENT: 14 January 2009.

1. Stimulation, E.G.G.o.O., et al., ESHRE guideline: ovarian stimulation for IVF/ICSI: an update in 2025dagger. Hum Reprod, 2026.

2. Melo, P., et al., Controlled ovarian stimulation protocols for assisted reproduction: a network meta-analysis. Cochrane Database Syst Rev, 2025. 7(7): p. CD012586.

3. Lobo, R., et al., One-year cumulative live birth rate associated with the number of oocytes in ovarian stimulation with follitropin delta: a pooled analysis of four randomized controlled trials. Hum Reprod, 2025. 40(8): p. 1526–1534.

5. Kuan, K.K.W., S. Omoseni, and J.A. Tello, Comparing ART outcomes in women with endometriosis after GnRH agonist versus GnRH antagonist ovarian stimulation: a systematic review. Ther Adv Endocrinol Metab, 2023. 14: p. 20420188231173325.

6. Ren, J., et al., Does prolonged pituitary down-regulation with gonadotropin-releasing hormone agonist improve the live-birth rate in in vitro fertilization treatment? Fertil Steril, 2014. 102(1): p. 75–81.

7. Song, J., et al., Comparison of GnRH-a Prolonged Protocol and Short GnRH-a Long Protocol in Patients with Thin Endometrium for Assisted Reproduction: A Retrospective Cohort Study. Drug Des Devel Ther, 2020. 14: p. 3673–3682.

8. Tian, L.F., et al., Mild starting dosage ovarian stimulation combined with a modified prolonged GnRH-a protocol improved IVF/ICSI outcomes in normal ovarian responders. Arch Med Sci, 2019. 15(5): p. 1294–1300.

9. Xu, B., et al., The depot GnRH agonist protocol improves the live birth rate per fresh embryo transfer cycle, but not the cumulative live birth rate in normal responders: a randomized controlled trial and molecular mechanism study. Hum Reprod, 2020. 35(6): p. 1306–1318.

10. La Marca, A. and S.K. Sunkara, Individualization of controlled ovarian stimulation in IVF using ovarian reserve markers: from theory to practice. Hum Reprod Update, 2014. 20(1): p. 124–40.

11. Toftager, M., et al., Cumulative live birth rates after one ART cycle including all subsequent frozen-thaw cycles in 1050 women: secondary outcome of an RCT comparing GnRH-antagonist and GnRH-agonist protocols. Hum Reprod, 2017. 32(3): p. 556–567.

Stimulation, E. G. G. o. O., B. Ata, E. Bosch, S. Broer, G. Griesinger, M. Grynberg, E. Kolibianakis, M. Kunicki, A. La Marca, G. Lainas, N. Le Clef, N. Massin, N. P. Polyzos, S. K. Sunkara, T. Timeva, M. Toyli, J. Urbancsek and F. Broekmans (2026). "ESHRE guideline: ovarian stimulation for IVF/ICSI: an update in 2025dagger." Hum Reprod.

Lobo, R., S. Santos-Ribeiro, A. Falahati, K. Moley, A. Pinborg, N. S. Macklon and I. E. Jepsen (2025). "One-year cumulative live birth rate associated with the number of oocytes in ovarian stimulation with follitropin delta: a pooled analysis of four randomized controlled trials." Hum Reprod 40(8): 1526–1534.

Kuan, K. K. W., S. Omoseni and J. A. Tello (2023). "Comparing ART outcomes in women with endometriosis after GnRH agonist versus GnRH antagonist ovarian stimulation: a systematic review." Ther Adv Endocrinol Metab 14: 20420188231173325.

Ren, J., A. Sha, D. Han, P. Li, J. Geng and C. Ma (2014). "Does prolonged pituitary down-regulation with gonadotropin-releasing hormone agonist improve the live-birth rate in in vitro fertilization treatment?" Fertil Steril 102(1): 75–81.

Song, J., C. Duan, W. Cai, W. Wu, H. Lv and J. Xu (2020). "Comparison of GnRH-a Prolonged Protocol and Short GnRH-a Long Protocol in Patients with Thin Endometrium for Assisted Reproduction: A Retrospective Cohort Study." Drug Des Devel Ther 14: 3673–3682.

Tian, L. F., J. Tan, Y. Zou, Q. Su, Y. Li, D. F. Xu and Q. F. Wu (2019). "Mild starting dosage ovarian stimulation combined with a modified prolonged GnRH-a protocol improved IVF/ICSI outcomes in normal ovarian responders." Arch Med Sci 15(5): 1294–1300.

Xu, B., D. Geerts, S. Hu, J. Yue, Z. Li, G. Zhu and L. Jin (2020). "The depot GnRH agonist protocol improves the live birth rate per fresh embryo transfer cycle, but not the cumulative live birth rate in normal responders: a randomized controlled trial and molecular mechanism study." Hum Reprod 35(6): 1306–1318.

La Marca, A. and S. K. Sunkara (2014). "Individualization of controlled ovarian stimulation in IVF using ovarian reserve markers: from theory to practice." Hum Reprod Update 20(1): 124–140.

Toftager, M., J. Bogstad, K. Lossl, L. Praetorius, A. Zedeler, T. Bryndorf, L. Nilas and A. Pinborg (2017). "Cumulative live birth rates after one ART cycle including all subsequent frozen-thaw cycles in 1050 women: secondary outcome of an RCT comparing GnRH-antagonist and GnRH-agonist protocols." Hum Reprod 32(3): 556–567.

Stimulation, E. G. G. o. O., et al. (2026). "ESHRE guideline: ovarian stimulation for IVF/ICSI: an update in 2025dagger." Hum Reprod.

STUDY QUESTION: What is the recommended management of ovarian stimulation, based on the best available evidence in the literature? SUMMARY ANSWER: This updated ESHRE guideline on ovarian stimulation for IVF/ICSI provides 121 recommendations, answering 21 key questions on ovarian stimulation for IVF/ICSI. WHAT IS KNOWN ALREADY? Before the ESHRE guideline on ovarian stimulation for IVF/ICSI was published in 2019, ovarian stimulation for IVF/ICSI had only been discussed briefly in the National Institute for Health and Care Excellence guideline on fertility problems and in a statement by the Royal Australian and New Zealand College of Obstetricians and Gynaecologists. STUDY DESIGN, SIZE, DURATION: The guideline was developed according to the structured methodology for ESHRE guidelines. The 18 key questions from the 2019 version of the guideline were revised by the Guideline Development Group (GDG). This resulted in the addition of one new key question, the splitting of the key question on fertility preservation in three separate key questions (fertility preservation for women facing gonadotoxic treatment, elective oocyte cryopreservation, and oocyte donation) and several new interventions being added to the existing key questions. Papers published between 31 October 2018 and 2 February 2025 and written in English were included. The critical outcomes for this guideline were efficacy in terms of cumulative live birth rate per started cycle or live birth rate per started cycle, as well as safety in terms of the rate of occurrence of moderate and/or severe ovarian hyperstimulation syndrome (OHSS). PARTICIPANTS/MATERIALS, SETTING, METHODS: Based on the available evidence, recommendations were formulated and discussed until consensus was reached within the GDG. Following stakeholder review of the initial draft, the final version was approved by the GDG and ultimately by the ESHRE Executive Committee. MAIN RESULTS AND THE ROLE OF CHANCE: The guideline provides a total of 121 recommendations: 42 recommendations remained unchanged in 2019, 4 recommendations were reworded for better understanding, 29 recommendations were updated in view of new evidence, and 46 new recommendations for 2025 have been formulated. The guideline provides 4 recommendations on pre-stimulation evaluation, 7 recommendations on pre-treatment therapies, 50 recommendations on pituitary suppression and ovarian stimulation, 17 recommendations on monitoring, 18 recommendations on triggering of final oocyte maturation and luteal support, and 8 recommendations on the prevention of OHSS. In addition, the guideline provides 17 recommendations on fertility preservation, both oncologic and elective, and oocyte donation. These include 90 evidence-based recommendations, of which only 42 were formulated as strong recommendations and 48 as conditional, as well as 29 good practice points and 2 research-only recommendations. Of the evidence-based recommendations, none were supported by high-quality evidence, 6 by moderate-quality evidence, 36 by low-quality evidence, and 148 by very low-quality evidence. To support future research on ovarian stimulation for IVF/ICSI, a list of research recommendations was provided. LIMITATIONS, REASONS FOR CAUTION: Several newer interventions are not well studied yet. For most of these interventions, a recommendation against the intervention or a research-only recommendation was formulated based on insufficient evidence. Future studies may require these recommendations to be revised. WIDER IMPLICATIONS OF THE FINDINGS: The guideline provides clinicians with clear advice on best practice in ovarian stimulation, based on the best evidence available. In addition, a list of research recommendations is provided to promote further studies in ovarian stimulation. STUDY FUNDING/COMPETING INTEREST(S): The guideline was developed by ESHRE, who funded the guideline meetings, literature searches, and dissemination of the guideline. The guideline group members did not receive any financial incentives; all work was provided voluntarily. BA reports speaker's fees from Gedeon-Richter, Ferring, IBSA, Intas, Merck, Organon, consulting fees from Merck, Organon, Oxolife, stock options from Global Fertility Solutions LLC (employee co-investment), and was chair of the Turkish Society of Reproductive Medicine. EB reports research grants from Roche Diagnostics and IBSA, consulting fees from MSD, Abbot, Gedeon-Richter, Roche, speaker's fees from IBSA, MSD, Ferring Pharmaceuticals, Abbot, Gedeon-Richter, Merck, Roche, participation in the advisory board of Ferring Pharmaceuticals, IBSA and Merck, and ownership interest from IVI-RMS Valencia. GG was part of the ESHRE working group on Recurrent Implantation Failure and the ESHRE working group on clinical KPISs, reports travel support from Merck, Organon, Ferring, Theramex, Gedeon-Richter, Abbott, consulting fees from Organon, Ferring, Merck, Gedeon-Richter, Theramex, Abbott, ReproNovo, Igyxos, OxoLife, Philipps, ReprodWissen, PregLem, Guerbet, Roche, IBSA, and Besins, speaker's fees from Organon, Ferring, Merck, Gedeon-Richter, Theramex, Abbott, ReproNovo, Igyxos, OxoLife, Philipps, ReprodWissen, PregLem, Guerbet, Roche, IBSA, and Besins, and research grants from Besin, Merck, Abbott, Ferring, Theramex. MG reports speaker's fees from Merck Serono, Ferring, and Gedeon Richter. EK reports travel/hotel expenses from Ferring, Merck SERONO, Vianex, speaker's fees from Ferring, Merck SERONO, Vianex, and is chair of the Greek Society of Fertility and Sterility. MK reports travel support and speaker's fees from Ferring. ALM reports research grants from Merck, Ferring, IBSA, Roche, Organon, Theramex, Beckman Coulter, and Gedeon-Richter, consulting fees from Merck, Ferring, IBSA, Roche, Organon, Theramex, Beckman Coulter, and Gedeon-Richter, speaker's fees from Merck, Ferring, IBSA, Roche, Organon, Theramex, Beckman Coulter, Gedeon-Richter, and participation on an advisory board of Merck, Organon, Ferring, Theramex, Gedeon Richter, and IBSA. GL reports consulting fees from Ferring and Merck, speaker's fees from Ferring, Merck, Gedeon-Richter, Organon, and Vianex, expert testimony fees from Cook, travel support from ESHRE, Ferring, Merck, Gedeon-Richter, Organon, and Vianex, is on the advisory board of Merck and Ferring, and participated in an ESHRE committee and on the Greek Fertility and Sterility Committee. NM reports research grants from IBSA, Organon, consulting fees from Organon, Merck, GE, Ferring, Abbott, and Cooper, and speaker's fees from Ferring, GE, Organon, IBSA, Merck, Theramex. NPP reports research grants from Besins Healthcare, Ferring Pharmaceutical, Merck Serono, Organon, Roche Diagnostics, and Theramex, consulting fees from Besins Healthcare, Alife, Ferring, IBSA, Merck Serono, Organon, Abbott, FertilAI, and speaker's fees from Besins Healthcare, Roche Diagnostics, Ferring Pharmaceuticals, Gedeon-Richter, IBSA, Merck Serono, Organon, and Theramex. SKS reports a research grant from Ferring, travel support from Merck and INTAS, consulting fees from Merck, and speaker's fees from Merck, MSD, INTAS, and Ferring. TT reports travel support from Merck, speaker's fees from Merck, Organon, MSD and is editor-in-chief of a Bulgarian journal, Reproductive Health. MT reports travel support from IBSA, Ferring, and Merck, consulting fees from Abbott and is a member of the board of the Finnish Endocrine Society. JU is a member of the Steering Committee of Richter Reproduction Network and received travel support from IBSA. FB reports a research grant from Besins, is on the advisory board of Merck and Abbott, reports speaker's fees from Ferring, Merck, Besins, Intas Fermaceuticals, PREIS School; he is the owner of FRANKSCHOOL RforL. The other authors have nothing to disclose. TRIAL REGISTRATION NUMBER: N/A. DISCLAIMER: This guideline represents the views of ESHRE, which were achieved after careful consideration of the scientific evidence available at the time of preparation. In the absence of scientific evidence on certain aspects, a consensus between the relevant ESHRE stakeholders has been obtained.Adherence to these clinical practice guidelines does not guarantee a successful or specific outcome, nor does it establish a standard of care. Clinical practice guidelines do not replace the need for application of clinical judgment to each individual presentation, nor variations based on locality and facility type.ESHRE makes no warranty, express or implied, regarding the clinical practice guidelines and specifically excludes any warranties of merchantability and fitness for a particular use or purpose. (The full disclaimer is available at www.eshre.eu/guidelines.).

Melo, P., et al. (2025). "Controlled ovarian stimulation protocols for assisted reproduction: a network meta-analysis." Cochrane Database Syst Rev 7(7): CD012586.

BACKGROUND: Controlled ovarian stimulation (COS) is an essential step in most assisted conception cycles. Different treatment combinations (termed protocols) exist in COS, yet there is no consensus on their relative effectiveness and safety. OBJECTIVES: We aimed to assess the relative effectiveness and safety of COS protocols in clinical practice. SEARCH METHODS: We followed standard Cochrane methodology to conduct extensive electronic searches to 11 June 2024. SELECTION CRITERIA: We included randomised controlled trials (RCTs) comparing at least two COS protocols using any form of pituitary suppression (gonadotrophin-releasing hormone (GnRH) agonists, antagonists or progestogens) and human menopausal gonadotropin (hMG), urinary or recombinant follicle-stimulating hormone (u/rFSH), with or without luteinising hormone (LH) and/or oral medications (e.g. clomifene or letrozole), for ovarian stimulation. The primary outcomes were the rates of live birth or ongoing pregnancy (LBR or OPR) and ovarian hyperstimulation syndrome (OHSS) per participant after one stimulation cycle. The secondary outcomes were the rates of clinical pregnancy, miscarriage, multiple pregnancy, ectopic pregnancy and cycle cancellation per participant, and the number of oocytes, cleavage-stage embryos, blastocyst-stage embryos and cryopreserved embryos per participant. DATA COLLECTION AND ANALYSIS: Two review authors independently selected studies and extracted data. We conducted pairwise and network meta-analyses (NMA) according to participants' predicted response to COS (normal/unselected, high or low). For each outcome and subgroup of women, we grouped treatment protocols into the following different networks: all pituitary suppression methods; all long GnRH agonist protocols; all short GnRH antagonist protocols; all GnRH agonist flare protocols; all protocols using progestogens for pituitary suppression; and all protocols using ovarian stimulation in the absence of pituitary suppression. Using the Cochrane RoB 1 tool, we restricted our primary analyses to RCTs at low risk of 'selection' and 'other' biases. We presented effect estimates as risk ratios (RR) for dichotomous outcomes, or mean difference (MD) for continuous outcomes, with 95% confidence intervals (CI). We used Review Manager and Stata 18 for the meta-analyses. MAIN RESULTS: We included 338 studies investigating a total of 15 pairwise comparisons between different COS protocols in 59,086 women. Of these, 226 trials included only women with predicted normal response or whose predicted response was unstated, 31 trials included only women with predicted high response and 81 trials included only women with predicted low response. Primary outcome (effectiveness) - LBR or OPR per woman randomised Pituitary suppression methods In women with predicted normal response, short antagonist protocols probably result in little to no difference in LBR or OPR versus long agonist protocols (RR 0.95, 95% CI 0.84 to 1.07; 8 studies, 2817 women; I(2) = 0%; moderate-certainty evidence). Network evidence also suggested that ovarian stimulation without pituitary suppression may reduce the LBR or OPR compared with short GnRH antagonist protocols (RR 0.71, 95% CI 0.57 to 0.90; low-certainty evidence) and with GnRH agonist flare protocols (RR 0.52, 95% CI 0.36 to 0.75; low-certainty evidence). Primary outcome (safety) - OHSS per woman randomised Pituitary suppression methods In women with predicted normal response, short GnRH antagonist protocols may reduce OHSS compared with long GnRH agonist protocols (RR 0.88, 95% CI 0.78 to 0.99; 7 studies, 2650 women; I(2) = 0%; low-certainty evidence). Short GnRH antagonist protocols In women with predicted high response receiving short GnRH antagonist protocols, hMG may reduce OHSS compared with rFSH (RR 0.45, 95% CI 0.3 to 0.68; 1 study, 619 women; low-certainty evidence). Secondary outcomes Clinical pregnancy Pituitary suppression methods In women with predicted normal response, network evidence suggested that ovarian stimulation without pituitary suppression lowers the clinical pregnancy rate compared with short GnRH antagonist protocols (RR 0.76, 95% CI 0.61 to 0.93; low-certainty evidence) and with GnRH agonist flare protocols (RR 0.60, 95% CI 0.44 to 0.82; low-certainty evidence). Cancellation Short GnRH antagonist protocols In women with predicted high response undergoing short GnRH antagonist protocols, hMG may increase cancellation compared with rFSH (RR 5.98, 95% CI 1.78 to 20.10; 1 study, 619 women; low-certainty evidence). For the remaining networks and participant subgroups (normal- and low-responding women), the evidence did not confidently identify differences between COS protocols and is not reported in the abstract. Oocyte number Pituitary suppression methods In women with predicted normal response, short GnRH antagonist protocols (MD -0.75, 95% CI -1.49 to -0.02; 17 studies, 4062 women; I(2) = 94%; low-certainty evidence), GnRH agonist flare protocols (MD -3.30, 95% CI -4.87 to -1.73; 1 study, 240 women; I(2) = 96%; low-certainty evidence) and protocols without pituitary suppression (MD -5.80, 95% CI -11.24 to -0.36; 2 studies, 714 women; low-certainty evidence) may lower the oocyte number compared with long GnRH agonist protocols, respectively. In women with predicted low response, short GnRH antagonist protocols may reduce the oocyte number versus long agonist protocols (MD -1.25, 95% CI -2.01 to -0.50; low-certainty evidence). Long GnRH agonist protocols In women with predicted normal response receiving long GnRH agonist protocols, combining rFSH and rLH reduces the oocyte number compared with rFSH alone (MD -0.81, 95% CI -1.33 to -0.28; 6 trials, 1289 women; I(2) = 0%; high-certainty evidence). Remaining evidence For the remaining networks, patient subgroups and secondary outcomes, the evidence did not confidently identify differences between COS protocols. AUTHORS' CONCLUSIONS: Short GnRH antagonist protocols may reduce OHSS rates in women with predicted normal response without compromising LBR or OPR. Ovarian stimulation without pituitary suppression may reduce the LBR or OPR compared with short GnRH antagonist protocols and with GnRH agonist flare protocols. In women with predicted high response receiving short GnRH antagonist protocols, hMG may reduce OHSS compared with rFSH. We were unable to meta-analyse results from 169 trials due to serious risk of selection or other biases, a lack of outcome data, or because of data reported in an unsuitable format for meta-analysis (e.g. per cycle); this led to underpowered analyses for several outcomes and pairwise comparisons. Future trials should focus on evaluating the effect of different COS protocols upon cumulative live birth rates, accounting for all embryo transfers (fresh and/or frozen) after a single stimulation cycle per participant.

Lobo, R., et al. (2025). "One-year cumulative live birth rate associated with the number of oocytes in ovarian stimulation with follitropin delta: a pooled analysis of four randomized controlled trials." Hum Reprod 40(8): 1526–1534.

STUDY QUESTION: What number of oocytes retrieved is associated with the highest cumulative live birth rates (CLBRs) in the fresh and subsequent frozen cycles following ovarian stimulation with follitropin delta? SUMMARY ANSWER: The CLBR increased with the number of oocytes retrieved, plateauing at 21-25 oocytes. WHAT IS KNOWN ALREADY: Live birth rate (LBR) per fresh cycle is the conventionally reported outcome of IVF; however, the marked increase in cryopreserved cycles in recent years suggests that the CLBR has emerged as a more relevant outcome. In the fresh cycle, the number of oocytes retrieved is regarded as a prognostic factor for LBR, and a similar association has been shown for CLBR. STUDY DESIGN, SIZE, DURATION: Pooled analysis including 1746 patients from four randomized controlled trials. Trials were identified from clinical trials available in the Ferring Pharmaceuticals database up to June 2023. Selected trials used follitropin delta for ovarian stimulation and collected outcome data from both fresh and frozen cycles. Follitropin delta dose-response trials, as well as trials investigating follitropin delta in repeated ovarian stimulation cycles, were excluded. Patients included in the analysis underwent ovarian stimulation with follitropin delta and had at least one oocyte retrieved. The outcome of CLBR in the fresh and subsequent frozen cycles was evaluated in relation to the number of oocytes retrieved. CLBR was calculated as the number of patients with at least one live birth divided by the number of all patients included in the analysis. PARTICIPANTS/MATERIALS, SETTING, METHODS: Trial participants were women, 18-42 years of age, who were undergoing their first or second IVF/ICSI cycle in a GnRH antagonist/agonist protocol. Triggering was performed with hCG or GnRH agonist, and insemination was performed by IVF or ICSI. Single or double blastocyst transfer was performed on Day 5 in the fresh cycle, and all viable surplus blastocysts were cryopreserved on Day 5 or Day 6. All pregnancies from the fresh cycle and frozen cycles initiated within 1 year after the start of stimulation were followed until birth. The association between the number of oocytes retrieved and CLBR was assessed using a logistic regression analysis with fractional polynomials to obtain predicted CLBR. Subgroup analyses were performed based on age, anti-Mullerian hormone (AMH), and number of oocytes retrieved. MAIN RESULTS AND THE ROLE OF CHANCE: Overall, 15 trials with follitropin delta were identified in the database. Of those, 11 trials were not eligible, and the remaining 4 trials were included. In total, 1746 patients were included in the analysis. The mean age was 33.8 years (range 21-42 years), and the median AMH level was 17.0 pmol/l (range 0.3-164.2 pmol/l). The vast majority of patients (1645 patients, 94.2%) were treated with a GnRH antagonist protocol, while 101 patients (5.8%) were treated with a GnRH agonist protocol. Overall, 1541 patients (88.3%) received hCG triggering, and 205 patients (11.7%) received GnRH agonist triggering. Frozen cycles (maximum of six) were initiated by 740 patients (42.4%). The study population underwent a total of 2948 cycles: 1746 fresh cycles (referring to ovarian stimulation cycles, with or without transfer) and 1202 frozen cycles (initiated cycles, with or without transfer). The mean number of oocytes retrieved was 12.4 (range 1-72), the fresh cycle LBR was 29.1%, and the CLBR was 51.4%. The CLBR increased with the number of oocytes retrieved up to a plateau starting at 21-25 oocytes. The CLBR reached above 60% at >15 oocytes and above 70% at >20 oocytes. The CLBR decreased with increasing age (57.1%, 51.6%, and 35.8% at <35, 35-37, and >/=38 years), while it was similar for AMH <15 and >/=15 pmol/l (52.0% and 50.9%, respectively). A continued increase in predicted CLBR from 15 oocytes retrieved was observed in older patients (>/=38 years); from 41.3% to 53.4% to 58.7% at 15-19, 20-24, and >/=25 oocytes. No equivalent benefit was observed in younger patients (<38 years), where corresponding rates were 72.5%, 68.0%, and 78.8% in patients <35 years and 70.3%, 73.1%, and 71.5% in patients 35-37 years. The fresh cycle LBR decreased beyond 14 oocytes, while the CLBR continued to increase by the number of oocytes retrieved. LIMITATIONS, REASONS FOR CAUTION: A limited number of patients included in the analysis had >/=20 oocytes retrieved (249 patients, 14.3%). WIDER IMPLICATIONS OF THE FINDINGS: This analysis suggests an increase in CLBR with the number of oocytes retrieved up to a plateau starting at 21-25 oocytes following ovarian stimulation cycles with follitropin delta and subsequent frozen cycles. An increase in CLBR from 20 oocytes was evident in older but not in younger patients. STUDY FUNDING/COMPETING INTEREST(S): The study was funded by Ferring Pharmaceuticals A/S, Copenhagen, Denmark. S.S.-R. has received research funding from Organon/MSD, Theramex, and Gedeon-Richter, consulting fees from Organon/MSD, Ferring Pharmaceuticals, Merck Serono, and IBSA, payment or honoraria from Organon/MSD, Besins and Gedeon-Richter, support for attending meetings from Gedeon-Richter and Besins, is an advisory board member for TTRANSPORT and Deputy of the ESHRE SQART SIG, and owns stocks of IVI Lisboa, Clinica de Reproducao assistida Lda. A.P. has received grants from Cryos, grants and payments from Gedeon Richter, Ferring Pharmaceuticals and Merck A/S, payments from Organon, consulting fees from IBSA, Ferring Pharmaceuticals, Gedeon Richter, Cryos, and Merck A/S, and travel support from Gedeon Richter. N.S.M. has received speaker and consultancy fees from Ferring Pharmaceuticals, IBSA, Merck, Freya, and Gedeon Richter, and is a shareholder in Verso Biosense. K.M. has been a scientific advisor for Calla Lily Clinical Care, Evvy, and AutoIVF. R.L., A.F., K.M., and I.E.J. are employees of Ferring Pharmaceuticals. REGISTRATION NUMBER: N/A.

Kuan, K. K. W., et al. (2023). "Comparing ART outcomes in women with endometriosis after GnRH agonist versus GnRH antagonist ovarian stimulation: a systematic review." Ther Adv Endocrinol Metab 14: 20420188231173325.

BACKGROUND: Endometriosis is an oestrogen-dependent disease that can cause subfertility in women who may require assisted reproductive technology (ART) to achieve their pregnancy goals. OBJECTIVES: The aim of this study was to compare ART outcomes in women with endometriosis following the long GnRH-agonist controlled ovarian stimulation (COS) protocol with those taking the GnRH-antagonist COS protocol. DATA SOURCES AND METHODS: MEDLINE, Embase and Web of Science were systematically searched in June 2022. Randomized controlled trials (RCTs) and observational studies comparing the long GnRH-agonist COS protocol and the GnRH-antagonist COS protocol in women with all stages/subtypes of endometriosis were included. Data were synthesized into comprehensive tables for systematic review. The Scottish Intercollegiate Guidelines Network (SIGN) checklists were used for the risk of bias assessment of non-randomized studies and randomized studies, and all the included studies were deemed to have acceptable quality. MAIN RESULTS: Eight studies (one RCT and seven observational) with 2695 patients (2761 cycles) were included. Most studies generally reported non-significant differences in clinical pregnancy or live birth rates regardless of the COS protocol used. However, the GnRH-agonist protocol may yield a higher total number of oocytes retrieved, especially mature oocytes. Conversely, the GnRH-antagonist protocol required a shorter COS duration and lower gonadotrophin dose. Adverse outcomes, such as rates of cycle cancellation and miscarriage, were similar between both COS protocols. CONCLUSION: Both the long GnRH-agonist and GnRH-antagonist COS protocols generally yield similar pregnancy outcomes. However, the long GnRH-agonist protocol may be associated with a higher cumulative pregnancy rate due to the higher number of retrieved oocytes available for cryopreservation. The underlying mechanisms of the two COS protocols on the female reproductive tract remain unclear. Clinicians should consider treatment costs, stage/subtype of endometriosis and pregnancy goals of their patients when selecting a GnRH analogue for COS. A well-powered RCT is needed to minimize the risk of bias and compare the risk for ovarian hyperstimulation syndrome. REGISTRATION: This review was prospectively registered at PROSPERO under Registration No. CRD42022327604.

Ren, J., et al. (2014). "Does prolonged pituitary down-regulation with gonadotropin-releasing hormone agonist improve the live-birth rate in in vitro fertilization treatment?" Fertil Steril 102(1): 75–81.

OBJECTIVE: To evaluate the effects of a prolonged duration of gonadotropin-releasing hormone agonist (GnRH-a) in pituitary down-regulation for controlled ovarian hyperstimulation (COH) on the live-birth rate in nonendometriotic women undergoing in vitro fertilization and embryo transfer (IVF-ET). DESIGN: Retrospective cohort study. SETTING: University-affiliated hospital. PATIENT(S): Normogonadotropic women undergoing IVF. INTERVENTION(S): Three hundred seventy-eight patients receiving a prolonged pituitary down-regulation with GnRH-a before ovarian stimulation and 422 patients receiving a GnRH-a long protocol. MAIN OUTCOME MEASURE(S): Live-birth rate per fresh ET. RESULT(S): In comparison with the long protocol, the prolonged down-regulation protocol required a higher total dose of gonadotropins. A lower serum luteinizing hormone (LH) level on the starting day of gonadotropin and the day of human chorionic gonadotropin (hCG) and a fewer number of oocytes and embryos were observed in the prolonged down-regulation protocol. However, the duration of stimulation and number of high-quality embryos were comparable between the two groups. A statistically significantly higher implantation rate (50.27% vs. 39.69%), clinical pregnancy rate (64.02% vs. 56.87%) and live-birth rate per fresh transfer cycle (55.56% vs. 45.73%) were observed in the prolonged protocol. CONCLUSION(S): Prolonged down-regulation in a GnRH-a protocol might increase the live-birth rates in normogonadotropic women.

Song, J., et al. (2020). "Comparison of GnRH-a Prolonged Protocol and Short GnRH-a Long Protocol in Patients with Thin Endometrium for Assisted Reproduction: A Retrospective Cohort Study." Drug Des Devel Ther 14: 3673–3682.

PURPOSE: Gonadotrophin releasing hormone agonist (GnRH-a) is widely used for pituitary down-regulation and recruiting more follicles in assisted reproduction. However, no information is available on its value for patients with thin endometrial thickness. PATIENTS AND METHODS: This was a retrospective cohort study of 302 patients with endometrium <8 mm undergoing fresh embryo transfer at a fertility center of a university hospital from January 2016 and December 2018. In 148 cycles of the GnRH-a prolonged protocol, one depot of 3.75 mg GnRH-a was injected on day 2 of the menstrual cycle, while in 154 cycles of the short GnRH-a long protocol, 0.1 mg of GnRH-a was injected daily from the mid-luteal phase. The live birth rate and clinical pregnancy rate were compared between the two groups. Other outcome measures included the implantation rate, miscarriage rate, and characteristics of stimulation procedures. RESULTS: Live birth rates and clinical pregnancy rates were significantly higher in the GnRH-a prolonged protocol group than in the other group (36.5% vs 20.8%, P=0.002; 43.9% vs 28.2%, P=0.006, respectively). The live birth rate was significantly increased in the prolonged protocol group (crude OR: 2.190, 95% CI: 1.311, 3.660; adjusted OR: 2.458, 95% CI: 1.430, 4.224) compared with that in the reference group. The implantation rate of the former group was also significantly higher than that of the latter group (35.4% vs 15.9%, P=0.000). There was no significant difference in miscarriage rates between the two protocols. In terms of stimulation procedures, the GnRH-a prolonged protocol group required significantly higher Gn time (10.9 vs 9.5 days, P=0.000) and Gn consumption (2625.0 vs 2047.5 IU, P=0.000) than the short GnRH-a long protocol group. CONCLUSION: The GnRH-a prolonged protocol in fresh embryo transfer cycles yielded better clinical outcomes of patients with thin endometrium than the short GnRH-a long protocol.

Tian, L. F., et al. (2019). "Mild starting dosage ovarian stimulation combined with a modified prolonged GnRH-a protocol improved IVF/ICSI outcomes in normal ovarian responders." Arch Med Sci 15(5): 1294–1300.

INTRODUCTION: Controlled ovarian hyperstimulation (COH) is essential for artificial reproduction technology (ART). This study aimed to evaluate the effects of a mild starting dosage of r-FSH ovarian stimulation after the modified prolonged GnRH-a down-regulation protocol for COH on the clinical outcomes in normal ovarian responders undergoing in vitro fertilization/intracytoplasmic sperm injection-embryo transfer (IVF/ICSI-ET). MATERIAL AND METHODS: In the retrospective study, the patients were separated into two groups according to the starting dosage of r-FSH: a mild dosage group (75 IU </= r-FSH < 150 IU, n = 858) and a conventional dosage group (150 IU </= r-FSH </= 225 IU, n = 535). Data were collected from clinical records. The baseline characteristics and clinical outcomes were compared between the two groups. RESULTS: Although the duration of r-FSH treatment was a little longer in the mild dosage group, the total r-FSH dosage and the cost of ovarian stimulation were significantly lower than those in the conventional dosage group. Furthermore, compared to the conventional dosage group, the number of retrieved oocytes was also lower in the mild dosage group, whereas the rates of two pronuclei (2PN) fertilized oocytes and good-quality embryos were remarkable higher. The implantation rate, clinical pregnancy rate and live birth rate were significantly higher in the mild dosage group. There was no difference in early miscarriages rate, incidence of moderate and severe ovarian hyper-stimulation syndrome (OHSS) or incidence of ectopic pregnancy between the two groups. CONCLUSIONS: The modified prolonged GnRH-a pituitary down-regulation regimen combined with mild r-FSH starting dosage improved IVF/ICSI outcomes and reduced the financial cost in normal ovarian responders.

Xu, B., et al. (2020). "The depot GnRH agonist protocol improves the live birth rate per fresh embryo transfer cycle, but not the cumulative live birth rate in normal responders: a randomized controlled trial and molecular mechanism study." Hum Reprod 35(6): 1306–1318.

STUDY QUESTION: Do cumulative live birth rates (CLBRs) after one complete ART cycle differ between the three commonly used controlled ovarian stimulation (COS) protocols (GnRH antagonist, depot GnRHa (GnRH agonist) and long GnRHa) in normal responders undergoing IVF/ICSI? SUMMARY ANSWER: There were similar CLBRs between the GnRH antagonist, depot GnRHa and long GnRHa protocols. WHAT IS KNOWN ALREADY: There is no consensus on which COS protocol is the most optimal in women with normal ovarian response. The CLBR provides the final success rate after one complete ART cycle, including the fresh and all subsequent frozen-thawed embryo transfer (ET) cycles. We suggest that the CLBR measure would allow for better comparisons between the different treatment protocols. STUDY DESIGN, SIZE, DURATION: A prospective controlled, randomized, open label trial was performed between May 2016 and May 2017. A total of 819 patients were allocated to the GnRH antagonist, depot GnRHa or long GnRHa protocol in a 1:1:1 ratio. The minimum follow-up time from the first IVF cycle was 2 years. To further investigate the potential effect of COS with the GnRH antagonist, depot GnRHa or long GnRHa protocol on endometrial receptivity, the expression of homeobox A10 (HOXA10), myeloid ecotropic viral integration site 1 (MEIS1) and leukemia inhibitory factor (LIF) endometrial receptivity markers was evaluated in endometrial tissue from patients treated with the different COS protocols. PARTICIPANTS/MATERIALS, SETTING, METHODS: Infertile women with normal ovarian response (n = 819) undergoing IVF/ICSI treatment were randomized to the GnRH antagonist, depot GnRHa or long GnRHa protocol. Both IVF and ICSI cycles were included, and the sperm samples used were either fresh or frozen partner ejaculates or frozen donor ejaculates. The primary outcome was the live birth rate (LBR) per fresh ET cycle, and the CLBR after one complete ART cycle, until the birth of a first child (after 28 weeks) or until all frozen embryos were used, whichever occurred first. Pipelle endometrial biopsies from 34 female patients were obtained on Days 7-8 after oocyte retrieval or spontaneous ovulation in natural cycles, respectively, and HOXA10, MEIS1 and LIF mRNA and protein expression levels in the human endometrium was determined by quantitative real-time PCR and western blot, respectively. MAIN RESULTS AND THE ROLE OF CHANCE: There were no significant differences in CLBRs between the GnRH antagonist, depot GnRHa or long GnRHa protocol (71.4 versus 75.5 versus 72.2%, respectively). However, there was a significantly higher LBR per fresh ET cycle in the depot GnRHa protocol than in the long GnRHa and GnRH antagonist protocols (62.6 versus 52.1% versus 45.6%, P < 0.05). Furthermore, HOXA10, MEIS1 and LIF mRNA and protein expression in endometrium all showed significantly higher in the depot GnRHa protocol than in the long GnRHa and GnRH antagonist protocols (P < 0.05). LIMITATIONS, REASONS FOR CAUTION: A limitation of our study was that both our clinicians and patients were not blinded to the randomization for the randomized controlled trial (RCT). An inclusion criterion for the current retrospective cohort study was based on the 'actual ovarian response' during COS treatment, while the included population for the RCT was 'expected normal responders' based on maternal age and ovarian reserve test. In addition, the analysis was restricted to patients under 40 years of age undergoing their first IVF cycle. Furthermore, the endometrial tissue was collected from patients who cancelled the fresh ET, which may include some patients at risk for ovarian hyperstimulation syndrome, however only patients with 4-19 oocytes retrieved were included in the molecular study. WIDER IMPLICATIONS OF THE FINDINGS: The depot GnRH agonist protocol improves the live birth rate per fresh ET cycle, but not the cumulative live birth rate in normal responders. A possible explanation for the improved LBR after fresh ET in the depot GnRHa protocol could be molecular signalling at the level of endometrial receptivity. STUDY FUNDING/COMPETING INTEREST(S): This project was funded by Grant 81571439 from the National Natural Sciences Foundation of China and Grant 2016YFC1000206-5 from the National Key Research & Development Program of China. The authors declare no conflict of interest. TRIAL REGISTRATION NUMBER: The RCT trial was registered at the Chinese Clinical Trial Registry, Study Number: ChiCTR-INR-16008220. TRIAL REGISTRATION DATE: 5 April 2016. DATE OF FIRST PATIENT'S ENROLLMENT: 12 May 2016.

La Marca, A. and S. K. Sunkara (2014). "Individualization of controlled ovarian stimulation in IVF using ovarian reserve markers: from theory to practice." Hum Reprod Update 20(1): 124–140.

BACKGROUND: The main objective of individualization of treatment in IVF is to offer every single woman the best treatment tailored to her own unique characteristics, thus maximizing the chances of pregnancy and eliminating the iatrogenic and avoidable risks resulting from ovarian stimulation. Personalization of treatment in IVF should be based on the prediction of ovarian response for every individual. The starting point is to identify if a woman is likely to have a normal, poor or a hyper response and choose the ideal treatment protocol tailored to this prediction. The objective of this review is to summarize the predictive ability of ovarian reserve markers, such as antral follicle count (AFC) and anti-Mullerian hormone (AMH), and the therapeutic strategies that have been proposed in IVF after this prediction. METHODS: A systematic review of the existing literature was performed by searching Medline, EMBASE, Cochrane library and Web of Science for publications in the English language related to AFC, AMH and their incorporation into controlled ovarian stimulation (COS) protocols in IVF. Literature available to May 2013 was included. RESULTS: The search generated 305 citations of which 41 and 25 studies, respectively, reporting the ability of AMH and AFC to predict response to COS were included in this review. The literature review demonstrated that AFC and AMH, the most sensitive markers of ovarian reserve identified to date, are ideal in planning personalized COS protocols. These sensitive markers permit prediction of the whole spectrum of ovarian response with reliable accuracy and clinicians may use either of the two markers as they can be considered interchangeable. Following the categorization of expected ovarian response to stimulation clinicians can adopt tailored therapeutic strategies for each patient. Current scientific trend suggests the elective use of the GnRH antagonist based regimen for hyper-responders, and probably also poor responders, as likely to be beneficial. The selection of the appropriate and individualized gonadotrophin dose is also of paramount importance for effective COS and subsequent IVF outcomes. CONCLUSION: Personalized IVF offers several benefits; it enables clinicians to give women more accurate information on their prognosis thus facilitating counselling especially in cases of extremes of ovarian response. The deployment of therapeutic strategies based on selective use of GnRH analogues and the fine tuning of the gonadotrophin dose on the basis of potential ovarian response in every single woman can allow for a safer and more effective IVF practice.

Toftager, M., et al. (2017). "Cumulative live birth rates after one ART cycle including all subsequent frozen-thaw cycles in 1050 women: secondary outcome of an RCT comparing GnRH-antagonist and GnRH-agonist protocols." Hum Reprod 32(3): 556–567.

STUDY QUESTION: Are cumulative live birth rates (CLBRs) similar in GnRH-antagonist and GnRH-agonist protocols for the first ART cycle including all subsequent frozen-thaw cycles from the same oocyte retrieval? SUMMARY ANSWER: The chances of at least one live birth following utilization of all fresh and frozen embryos after the first ART cycle are similar in GnRH-antagonist and GnRH-agonist protocols. WHAT IS KNOWN ALREADY: Reproductive outcomes of ART treatment are traditionally reported as pregnancies per cycle or per embryo transfer. However, the primary concern is the overall chance of a live birth. After the first ART cycle with fresh embryo transfer, we found live birth rates (LBRs) of 22.8% and 23.8% (P = 0.70) for the GnRH-antagonist and GnRH-agonist protocols, respectively. But with CLBRs including both fresh and frozen embryos from the first oocyte retrieval, chances of at least one live birth increases. There are no previous randomized controlled trials (RCTs) comparing CLBRs in GnRH-antagonist versus GnRH-agonist protocols. Previous studies on CLBR are either retrospective cohort studies including multiple fresh cycles or RCTs comparing single embryo transfer (SET) with double embryo transfer (DET). STUDY DESIGN, SIZE, DURATION: CLBR was a secondary outcome in a Phase IV, dual-center, open-label, RCT including 1050 women allocated to a short GnRH-antagonist or a long GnRH-agonist protocol in a 1:1 ratio over a 5-year period using a web-based concealed randomization code. The minimum follow-up time from the first IVF cycle was 2 years. The aim was to compare CLBR between the two groups following utilization of all fresh and frozen embryos from the first ART cycle. PARTICIPANTS/MATERIALS, SETTING, METHODS: All women referred for their first ART cycle at two public fertility clinics, <40 years of age were approached. A total of 1050 subjects were allocated to treatment and 1023 women started standardized ART protocols with recombinant human follitropin-beta (rFSH) stimulation. Day-2 SET was planned and additional embryos were frozen and used in subsequent frozen-thawed cycles. All pregnancies generated from oocyte retrieval during the first IVF cycle including fresh and frozen-thaw cycles were registered. Ongoing pregnancy was determined by ultrasonography at gestational week 7-9 and live birth was irrespective of the duration of gestation. CLBR was defined as at least one live birth per allocated woman after fresh and frozen cycles. Subjects were censored out after the first live birth. Cox proportional hazard model was used to evaluate the relative prognostic significance of female age, BMI, the number of retrieved oocytes and the diagnosis of infertility in relation to the CLBR. MAIN RESULTS AND THE ROLE OF CHANCE: Baseline characteristics were similar and equal proportions of patients continued with frozen-thaw (frozen embryo transfer, FET) cycles after their fresh ART cycle in the GnRH-antagonist and GnRH-agonist arms. When combining all fresh and frozen-thaw embryo transfers from first oocyte retrieval with a minimum of 2-year follow-up, the CLBR was 34.1% (182/534) in the GnRH-antagonist group versus 31.2% (161/516) in the GnRH-agonist group (odds ratio (OR):1.14; 95% CI: 0.88-1.48, P = 0.32). Mean time to the first live birth was 11.0 months in the GnRH-antagonist group compared to 11.5 months in the GnRH-agonist group (P < 0.01). The total number of deliveries from all FET cycles where embryos were thawed were higher in the antagonist group 64/330 (19.4%) compared to the agonist group 43/355 (12.1%) ((OR): 1.74; 95% CI: 1.14-2.66, P = 0.01). The evaluation of prognostic factors showed that more retrieved oocytes were associated with a significantly higher CLBR in both treatment groups. For the subgroup of obese women (BMI >30 kg/m2), the CLBR was significantly higher in the GnRH-antagonist group (P = 0.02). LIMITATIONS, REASONS FOR CAUTION: The duration of the trial is a possible limitation with introduction of new methods as 'Freeze all' and 'GnRH-agonist triggering', but as these treatments were used in only few women, a systematic bias is not likely. Blastocyst culture of surplus embryos for freezing was introduced to both groups simultaneously, thereby minimizing the risk of bias. Furthermore, with a minimum of 2-year follow-up, a minority (<1%) still had cryopreserved embryos and no live birth at the end of the trial. The post hoc prognostic covariate analyses with multiple strata should be interpreted with caution. Finally, the physicians were not blinded to GnRH treatment group after randomization. WIDER IMPLICATIONS OF THE FINDINGS: With the improvement of embryo culture, freezing and thawing methods as well as a strategy of elective SET, CLBR until first live birth provides an all-inclusive success rate for ART. When comparing GnRH-antagonist and GnRH-agonist protocols, we find similar CLBRs, despite more oocytes being retrieved in the GnRH-agonist protocol. STUDY FUNDING/COMPETING INTERESTS: An unrestricted research grant is funded by Merck Sharp & Dohme Corp., a subsidiary of Merck & Co., Inc., Kenilworth, NJ, USA (MSD). The funders had no influence on the data collection, analyses or conclusions of the study. No conflict of interests to declare. TRIAL REGISTRATION NUMBER: EudraCT #: 2008-005452-24. ClinicalTrial.gov: NCT00756028. TRIAL REGISTRATION DATE: 18 September 2008. DATE OF FIRST PATIENT'S ENROLLMENT: 14 January 2009.

Stimulation, E. G. G. o. O., et al. (2026). "ESHRE guideline: ovarian stimulation for IVF/ICSI: an update in 2025dagger." Hum Reprod.

STUDY QUESTION: What is the recommended management of ovarian stimulation, based on the best available evidence in the literature? SUMMARY ANSWER: This updated ESHRE guideline on ovarian stimulation for IVF/ICSI provides 121 recommendations, answering 21 key questions on ovarian stimulation for IVF/ICSI. WHAT IS KNOWN ALREADY? Before the ESHRE guideline on ovarian stimulation for IVF/ICSI was published in 2019, ovarian stimulation for IVF/ICSI had only been discussed briefly in the National Institute for Health and Care Excellence guideline on fertility problems and in a statement by the Royal Australian and New Zealand College of Obstetricians and Gynaecologists. STUDY DESIGN, SIZE, DURATION: The guideline was developed according to the structured methodology for ESHRE guidelines. The 18 key questions from the 2019 version of the guideline were revised by the Guideline Development Group (GDG). This resulted in the addition of one new key question, the splitting of the key question on fertility preservation in three separate key questions (fertility preservation for women facing gonadotoxic treatment, elective oocyte cryopreservation, and oocyte donation) and several new interventions being added to the existing key questions. Papers published between 31 October 2018 and 2 February 2025 and written in English were included. The critical outcomes for this guideline were efficacy in terms of cumulative live birth rate per started cycle or live birth rate per started cycle, as well as safety in terms of the rate of occurrence of moderate and/or severe ovarian hyperstimulation syndrome (OHSS). PARTICIPANTS/MATERIALS, SETTING, METHODS: Based on the available evidence, recommendations were formulated and discussed until consensus was reached within the GDG. Following stakeholder review of the initial draft, the final version was approved by the GDG and ultimately by the ESHRE Executive Committee. MAIN RESULTS AND THE ROLE OF CHANCE: The guideline provides a total of 121 recommendations: 42 recommendations remained unchanged in 2019, 4 recommendations were reworded for better understanding, 29 recommendations were updated in view of new evidence, and 46 new recommendations for 2025 have been formulated. The guideline provides 4 recommendations on pre-stimulation evaluation, 7 recommendations on pre-treatment therapies, 50 recommendations on pituitary suppression and ovarian stimulation, 17 recommendations on monitoring, 18 recommendations on triggering of final oocyte maturation and luteal support, and 8 recommendations on the prevention of OHSS. In addition, the guideline provides 17 recommendations on fertility preservation, both oncologic and elective, and oocyte donation. These include 90 evidence-based recommendations, of which only 42 were formulated as strong recommendations and 48 as conditional, as well as 29 good practice points and 2 research-only recommendations. Of the evidence-based recommendations, none were supported by high-quality evidence, 6 by moderate-quality evidence, 36 by low-quality evidence, and 148 by very low-quality evidence. To support future research on ovarian stimulation for IVF/ICSI, a list of research recommendations was provided. LIMITATIONS, REASONS FOR CAUTION: Several newer interventions are not well studied yet. For most of these interventions, a recommendation against the intervention or a research-only recommendation was formulated based on insufficient evidence. Future studies may require these recommendations to be revised. WIDER IMPLICATIONS OF THE FINDINGS: The guideline provides clinicians with clear advice on best practice in ovarian stimulation, based on the best evidence available. In addition, a list of research recommendations is provided to promote further studies in ovarian stimulation. STUDY FUNDING/COMPETING INTEREST(S): The guideline was developed by ESHRE, who funded the guideline meetings, literature searches, and dissemination of the guideline. The guideline group members did not receive any financial incentives; all work was provided voluntarily. BA reports speaker's fees from Gedeon-Richter, Ferring, IBSA, Intas, Merck, Organon, consulting fees from Merck, Organon, Oxolife, stock options from Global Fertility Solutions LLC (employee co-investment), and was chair of the Turkish Society of Reproductive Medicine. EB reports research grants from Roche Diagnostics and IBSA, consulting fees from MSD, Abbot, Gedeon-Richter, Roche, speaker's fees from IBSA, MSD, Ferring Pharmaceuticals, Abbot, Gedeon-Richter, Merck, Roche, participation in the advisory board of Ferring Pharmaceuticals, IBSA and Merck, and ownership interest from IVI-RMS Valencia. GG was part of the ESHRE working group on Recurrent Implantation Failure and the ESHRE working group on clinical KPISs, reports travel support from Merck, Organon, Ferring, Theramex, Gedeon-Richter, Abbott, consulting fees from Organon, Ferring, Merck, Gedeon-Richter, Theramex, Abbott, ReproNovo, Igyxos, OxoLife, Philipps, ReprodWissen, PregLem, Guerbet, Roche, IBSA, and Besins, speaker's fees from Organon, Ferring, Merck, Gedeon-Richter, Theramex, Abbott, ReproNovo, Igyxos, OxoLife, Philipps, ReprodWissen, PregLem, Guerbet, Roche, IBSA, and Besins, and research grants from Besin, Merck, Abbott, Ferring, Theramex. MG reports speaker's fees from Merck Serono, Ferring, and Gedeon Richter. EK reports travel/hotel expenses from Ferring, Merck SERONO, Vianex, speaker's fees from Ferring, Merck SERONO, Vianex, and is chair of the Greek Society of Fertility and Sterility. MK reports travel support and speaker's fees from Ferring. ALM reports research grants from Merck, Ferring, IBSA, Roche, Organon, Theramex, Beckman Coulter, and Gedeon-Richter, consulting fees from Merck, Ferring, IBSA, Roche, Organon, Theramex, Beckman Coulter, and Gedeon-Richter, speaker's fees from Merck, Ferring, IBSA, Roche, Organon, Theramex, Beckman Coulter, Gedeon-Richter, and participation on an advisory board of Merck, Organon, Ferring, Theramex, Gedeon Richter, and IBSA. GL reports consulting fees from Ferring and Merck, speaker's fees from Ferring, Merck, Gedeon-Richter, Organon, and Vianex, expert testimony fees from Cook, travel support from ESHRE, Ferring, Merck, Gedeon-Richter, Organon, and Vianex, is on the advisory board of Merck and Ferring, and participated in an ESHRE committee and on the Greek Fertility and Sterility Committee. NM reports research grants from IBSA, Organon, consulting fees from Organon, Merck, GE, Ferring, Abbott, and Cooper, and speaker's fees from Ferring, GE, Organon, IBSA, Merck, Theramex. NPP reports research grants from Besins Healthcare, Ferring Pharmaceutical, Merck Serono, Organon, Roche Diagnostics, and Theramex, consulting fees from Besins Healthcare, Alife, Ferring, IBSA, Merck Serono, Organon, Abbott, FertilAI, and speaker's fees from Besins Healthcare, Roche Diagnostics, Ferring Pharmaceuticals, Gedeon-Richter, IBSA, Merck Serono, Organon, and Theramex. SKS reports a research grant from Ferring, travel support from Merck and INTAS, consulting fees from Merck, and speaker's fees from Merck, MSD, INTAS, and Ferring. TT reports travel support from Merck, speaker's fees from Merck, Organon, MSD and is editor-in-chief of a Bulgarian journal, Reproductive Health. MT reports travel support from IBSA, Ferring, and Merck, consulting fees from Abbott and is a member of the board of the Finnish Endocrine Society. JU is a member of the Steering Committee of Richter Reproduction Network and received travel support from IBSA. FB reports a research grant from Besins, is on the advisory board of Merck and Abbott, reports speaker's fees from Ferring, Merck, Besins, Intas Fermaceuticals, PREIS School; he is the owner of FRANKSCHOOL RforL. The other authors have nothing to disclose. TRIAL REGISTRATION NUMBER: N/A. DISCLAIMER: This guideline represents the views of ESHRE, which were achieved after careful consideration of the scientific evidence available at the time of preparation. In the absence of scientific evidence on certain aspects, a consensus between the relevant ESHRE stakeholders has been obtained.Adherence to these clinical practice guidelines does not guarantee a successful or specific outcome, nor does it establish a standard of care. Clinical practice guidelines do not replace the need for application of clinical judgment to each individual presentation, nor variations based on locality and facility type.ESHRE makes no warranty, express or implied, regarding the clinical practice guidelines and specifically excludes any warranties of merchantability and fitness for a particular use or purpose. (The full disclaimer is available at www.eshre.eu/guidelines.).

Melo, P., et al. (2025). "Controlled ovarian stimulation protocols for assisted reproduction: a network meta-analysis." Cochrane Database Syst Rev 7(7): CD012586.

BACKGROUND: Controlled ovarian stimulation (COS) is an essential step in most assisted conception cycles. Different treatment combinations (termed protocols) exist in COS, yet there is no consensus on their relative effectiveness and safety. OBJECTIVES: We aimed to assess the relative effectiveness and safety of COS protocols in clinical practice. SEARCH METHODS: We followed standard Cochrane methodology to conduct extensive electronic searches to 11 June 2024. SELECTION CRITERIA: We included randomised controlled trials (RCTs) comparing at least two COS protocols using any form of pituitary suppression (gonadotrophin-releasing hormone (GnRH) agonists, antagonists or progestogens) and human menopausal gonadotropin (hMG), urinary or recombinant follicle-stimulating hormone (u/rFSH), with or without luteinising hormone (LH) and/or oral medications (e.g. clomifene or letrozole), for ovarian stimulation. The primary outcomes were the rates of live birth or ongoing pregnancy (LBR or OPR) and ovarian hyperstimulation syndrome (OHSS) per participant after one stimulation cycle. The secondary outcomes were the rates of clinical pregnancy, miscarriage, multiple pregnancy, ectopic pregnancy and cycle cancellation per participant, and the number of oocytes, cleavage-stage embryos, blastocyst-stage embryos and cryopreserved embryos per participant. DATA COLLECTION AND ANALYSIS: Two review authors independently selected studies and extracted data. We conducted pairwise and network meta-analyses (NMA) according to participants' predicted response to COS (normal/unselected, high or low). For each outcome and subgroup of women, we grouped treatment protocols into the following different networks: all pituitary suppression methods; all long GnRH agonist protocols; all short GnRH antagonist protocols; all GnRH agonist flare protocols; all protocols using progestogens for pituitary suppression; and all protocols using ovarian stimulation in the absence of pituitary suppression. Using the Cochrane RoB 1 tool, we restricted our primary analyses to RCTs at low risk of 'selection' and 'other' biases. We presented effect estimates as risk ratios (RR) for dichotomous outcomes, or mean difference (MD) for continuous outcomes, with 95% confidence intervals (CI). We used Review Manager and Stata 18 for the meta-analyses. MAIN RESULTS: We included 338 studies investigating a total of 15 pairwise comparisons between different COS protocols in 59,086 women. Of these, 226 trials included only women with predicted normal response or whose predicted response was unstated, 31 trials included only women with predicted high response and 81 trials included only women with predicted low response. Primary outcome (effectiveness) - LBR or OPR per woman randomised Pituitary suppression methods In women with predicted normal response, short antagonist protocols probably result in little to no difference in LBR or OPR versus long agonist protocols (RR 0.95, 95% CI 0.84 to 1.07; 8 studies, 2817 women; I(2) = 0%; moderate-certainty evidence). Network evidence also suggested that ovarian stimulation without pituitary suppression may reduce the LBR or OPR compared with short GnRH antagonist protocols (RR 0.71, 95% CI 0.57 to 0.90; low-certainty evidence) and with GnRH agonist flare protocols (RR 0.52, 95% CI 0.36 to 0.75; low-certainty evidence). Primary outcome (safety) - OHSS per woman randomised Pituitary suppression methods In women with predicted normal response, short GnRH antagonist protocols may reduce OHSS compared with long GnRH agonist protocols (RR 0.88, 95% CI 0.78 to 0.99; 7 studies, 2650 women; I(2) = 0%; low-certainty evidence). Short GnRH antagonist protocols In women with predicted high response receiving short GnRH antagonist protocols, hMG may reduce OHSS compared with rFSH (RR 0.45, 95% CI 0.3 to 0.68; 1 study, 619 women; low-certainty evidence). Secondary outcomes Clinical pregnancy Pituitary suppression methods In women with predicted normal response, network evidence suggested that ovarian stimulation without pituitary suppression lowers the clinical pregnancy rate compared with short GnRH antagonist protocols (RR 0.76, 95% CI 0.61 to 0.93; low-certainty evidence) and with GnRH agonist flare protocols (RR 0.60, 95% CI 0.44 to 0.82; low-certainty evidence). Cancellation Short GnRH antagonist protocols In women with predicted high response undergoing short GnRH antagonist protocols, hMG may increase cancellation compared with rFSH (RR 5.98, 95% CI 1.78 to 20.10; 1 study, 619 women; low-certainty evidence). For the remaining networks and participant subgroups (normal- and low-responding women), the evidence did not confidently identify differences between COS protocols and is not reported in the abstract. Oocyte number Pituitary suppression methods In women with predicted normal response, short GnRH antagonist protocols (MD -0.75, 95% CI -1.49 to -0.02; 17 studies, 4062 women; I(2) = 94%; low-certainty evidence), GnRH agonist flare protocols (MD -3.30, 95% CI -4.87 to -1.73; 1 study, 240 women; I(2) = 96%; low-certainty evidence) and protocols without pituitary suppression (MD -5.80, 95% CI -11.24 to -0.36; 2 studies, 714 women; low-certainty evidence) may lower the oocyte number compared with long GnRH agonist protocols, respectively. In women with predicted low response, short GnRH antagonist protocols may reduce the oocyte number versus long agonist protocols (MD -1.25, 95% CI -2.01 to -0.50; low-certainty evidence). Long GnRH agonist protocols In women with predicted normal response receiving long GnRH agonist protocols, combining rFSH and rLH reduces the oocyte number compared with rFSH alone (MD -0.81, 95% CI -1.33 to -0.28; 6 trials, 1289 women; I(2) = 0%; high-certainty evidence). Remaining evidence For the remaining networks, patient subgroups and secondary outcomes, the evidence did not confidently identify differences between COS protocols. AUTHORS' CONCLUSIONS: Short GnRH antagonist protocols may reduce OHSS rates in women with predicted normal response without compromising LBR or OPR. Ovarian stimulation without pituitary suppression may reduce the LBR or OPR compared with short GnRH antagonist protocols and with GnRH agonist flare protocols. In women with predicted high response receiving short GnRH antagonist protocols, hMG may reduce OHSS compared with rFSH. We were unable to meta-analyse results from 169 trials due to serious risk of selection or other biases, a lack of outcome data, or because of data reported in an unsuitable format for meta-analysis (e.g. per cycle); this led to underpowered analyses for several outcomes and pairwise comparisons. Future trials should focus on evaluating the effect of different COS protocols upon cumulative live birth rates, accounting for all embryo transfers (fresh and/or frozen) after a single stimulation cycle per participant.

Lobo, R., et al. (2025). "One-year cumulative live birth rate associated with the number of oocytes in ovarian stimulation with follitropin delta: a pooled analysis of four randomized controlled trials." Hum Reprod 40(8): 1526–1534.

STUDY QUESTION: What number of oocytes retrieved is associated with the highest cumulative live birth rates (CLBRs) in the fresh and subsequent frozen cycles following ovarian stimulation with follitropin delta? SUMMARY ANSWER: The CLBR increased with the number of oocytes retrieved, plateauing at 21-25 oocytes. WHAT IS KNOWN ALREADY: Live birth rate (LBR) per fresh cycle is the conventionally reported outcome of IVF; however, the marked increase in cryopreserved cycles in recent years suggests that the CLBR has emerged as a more relevant outcome. In the fresh cycle, the number of oocytes retrieved is regarded as a prognostic factor for LBR, and a similar association has been shown for CLBR. STUDY DESIGN, SIZE, DURATION: Pooled analysis including 1746 patients from four randomized controlled trials. Trials were identified from clinical trials available in the Ferring Pharmaceuticals database up to June 2023. Selected trials used follitropin delta for ovarian stimulation and collected outcome data from both fresh and frozen cycles. Follitropin delta dose-response trials, as well as trials investigating follitropin delta in repeated ovarian stimulation cycles, were excluded. Patients included in the analysis underwent ovarian stimulation with follitropin delta and had at least one oocyte retrieved. The outcome of CLBR in the fresh and subsequent frozen cycles was evaluated in relation to the number of oocytes retrieved. CLBR was calculated as the number of patients with at least one live birth divided by the number of all patients included in the analysis. PARTICIPANTS/MATERIALS, SETTING, METHODS: Trial participants were women, 18-42 years of age, who were undergoing their first or second IVF/ICSI cycle in a GnRH antagonist/agonist protocol. Triggering was performed with hCG or GnRH agonist, and insemination was performed by IVF or ICSI. Single or double blastocyst transfer was performed on Day 5 in the fresh cycle, and all viable surplus blastocysts were cryopreserved on Day 5 or Day 6. All pregnancies from the fresh cycle and frozen cycles initiated within 1 year after the start of stimulation were followed until birth. The association between the number of oocytes retrieved and CLBR was assessed using a logistic regression analysis with fractional polynomials to obtain predicted CLBR. Subgroup analyses were performed based on age, anti-Mullerian hormone (AMH), and number of oocytes retrieved. MAIN RESULTS AND THE ROLE OF CHANCE: Overall, 15 trials with follitropin delta were identified in the database. Of those, 11 trials were not eligible, and the remaining 4 trials were included. In total, 1746 patients were included in the analysis. The mean age was 33.8 years (range 21-42 years), and the median AMH level was 17.0 pmol/l (range 0.3-164.2 pmol/l). The vast majority of patients (1645 patients, 94.2%) were treated with a GnRH antagonist protocol, while 101 patients (5.8%) were treated with a GnRH agonist protocol. Overall, 1541 patients (88.3%) received hCG triggering, and 205 patients (11.7%) received GnRH agonist triggering. Frozen cycles (maximum of six) were initiated by 740 patients (42.4%). The study population underwent a total of 2948 cycles: 1746 fresh cycles (referring to ovarian stimulation cycles, with or without transfer) and 1202 frozen cycles (initiated cycles, with or without transfer). The mean number of oocytes retrieved was 12.4 (range 1-72), the fresh cycle LBR was 29.1%, and the CLBR was 51.4%. The CLBR increased with the number of oocytes retrieved up to a plateau starting at 21-25 oocytes. The CLBR reached above 60% at >15 oocytes and above 70% at >20 oocytes. The CLBR decreased with increasing age (57.1%, 51.6%, and 35.8% at <35, 35-37, and >/=38 years), while it was similar for AMH <15 and >/=15 pmol/l (52.0% and 50.9%, respectively). A continued increase in predicted CLBR from 15 oocytes retrieved was observed in older patients (>/=38 years); from 41.3% to 53.4% to 58.7% at 15-19, 20-24, and >/=25 oocytes. No equivalent benefit was observed in younger patients (<38 years), where corresponding rates were 72.5%, 68.0%, and 78.8% in patients <35 years and 70.3%, 73.1%, and 71.5% in patients 35-37 years. The fresh cycle LBR decreased beyond 14 oocytes, while the CLBR continued to increase by the number of oocytes retrieved. LIMITATIONS, REASONS FOR CAUTION: A limited number of patients included in the analysis had >/=20 oocytes retrieved (249 patients, 14.3%). WIDER IMPLICATIONS OF THE FINDINGS: This analysis suggests an increase in CLBR with the number of oocytes retrieved up to a plateau starting at 21-25 oocytes following ovarian stimulation cycles with follitropin delta and subsequent frozen cycles. An increase in CLBR from 20 oocytes was evident in older but not in younger patients. STUDY FUNDING/COMPETING INTEREST(S): The study was funded by Ferring Pharmaceuticals A/S, Copenhagen, Denmark. S.S.-R. has received research funding from Organon/MSD, Theramex, and Gedeon-Richter, consulting fees from Organon/MSD, Ferring Pharmaceuticals, Merck Serono, and IBSA, payment or honoraria from Organon/MSD, Besins and Gedeon-Richter, support for attending meetings from Gedeon-Richter and Besins, is an advisory board member for TTRANSPORT and Deputy of the ESHRE SQART SIG, and owns stocks of IVI Lisboa, Clinica de Reproducao assistida Lda. A.P. has received grants from Cryos, grants and payments from Gedeon Richter, Ferring Pharmaceuticals and Merck A/S, payments from Organon, consulting fees from IBSA, Ferring Pharmaceuticals, Gedeon Richter, Cryos, and Merck A/S, and travel support from Gedeon Richter. N.S.M. has received speaker and consultancy fees from Ferring Pharmaceuticals, IBSA, Merck, Freya, and Gedeon Richter, and is a shareholder in Verso Biosense. K.M. has been a scientific advisor for Calla Lily Clinical Care, Evvy, and AutoIVF. R.L., A.F., K.M., and I.E.J. are employees of Ferring Pharmaceuticals. REGISTRATION NUMBER: N/A.

Kuan, K. K. W., et al. (2023). "Comparing ART outcomes in women with endometriosis after GnRH agonist versus GnRH antagonist ovarian stimulation: a systematic review." Ther Adv Endocrinol Metab 14: 20420188231173325.

BACKGROUND: Endometriosis is an oestrogen-dependent disease that can cause subfertility in women who may require assisted reproductive technology (ART) to achieve their pregnancy goals. OBJECTIVES: The aim of this study was to compare ART outcomes in women with endometriosis following the long GnRH-agonist controlled ovarian stimulation (COS) protocol with those taking the GnRH-antagonist COS protocol. DATA SOURCES AND METHODS: MEDLINE, Embase and Web of Science were systematically searched in June 2022. Randomized controlled trials (RCTs) and observational studies comparing the long GnRH-agonist COS protocol and the GnRH-antagonist COS protocol in women with all stages/subtypes of endometriosis were included. Data were synthesized into comprehensive tables for systematic review. The Scottish Intercollegiate Guidelines Network (SIGN) checklists were used for the risk of bias assessment of non-randomized studies and randomized studies, and all the included studies were deemed to have acceptable quality. MAIN RESULTS: Eight studies (one RCT and seven observational) with 2695 patients (2761 cycles) were included. Most studies generally reported non-significant differences in clinical pregnancy or live birth rates regardless of the COS protocol used. However, the GnRH-agonist protocol may yield a higher total number of oocytes retrieved, especially mature oocytes. Conversely, the GnRH-antagonist protocol required a shorter COS duration and lower gonadotrophin dose. Adverse outcomes, such as rates of cycle cancellation and miscarriage, were similar between both COS protocols. CONCLUSION: Both the long GnRH-agonist and GnRH-antagonist COS protocols generally yield similar pregnancy outcomes. However, the long GnRH-agonist protocol may be associated with a higher cumulative pregnancy rate due to the higher number of retrieved oocytes available for cryopreservation. The underlying mechanisms of the two COS protocols on the female reproductive tract remain unclear. Clinicians should consider treatment costs, stage/subtype of endometriosis and pregnancy goals of their patients when selecting a GnRH analogue for COS. A well-powered RCT is needed to minimize the risk of bias and compare the risk for ovarian hyperstimulation syndrome. REGISTRATION: This review was prospectively registered at PROSPERO under Registration No. CRD42022327604.

Ren, J., et al. (2014). "Does prolonged pituitary down-regulation with gonadotropin-releasing hormone agonist improve the live-birth rate in in vitro fertilization treatment?" Fertil Steril 102(1): 75–81.

OBJECTIVE: To evaluate the effects of a prolonged duration of gonadotropin-releasing hormone agonist (GnRH-a) in pituitary down-regulation for controlled ovarian hyperstimulation (COH) on the live-birth rate in nonendometriotic women undergoing in vitro fertilization and embryo transfer (IVF-ET). DESIGN: Retrospective cohort study. SETTING: University-affiliated hospital. PATIENT(S): Normogonadotropic women undergoing IVF. INTERVENTION(S): Three hundred seventy-eight patients receiving a prolonged pituitary down-regulation with GnRH-a before ovarian stimulation and 422 patients receiving a GnRH-a long protocol. MAIN OUTCOME MEASURE(S): Live-birth rate per fresh ET. RESULT(S): In comparison with the long protocol, the prolonged down-regulation protocol required a higher total dose of gonadotropins. A lower serum luteinizing hormone (LH) level on the starting day of gonadotropin and the day of human chorionic gonadotropin (hCG) and a fewer number of oocytes and embryos were observed in the prolonged down-regulation protocol. However, the duration of stimulation and number of high-quality embryos were comparable between the two groups. A statistically significantly higher implantation rate (50.27% vs. 39.69%), clinical pregnancy rate (64.02% vs. 56.87%) and live-birth rate per fresh transfer cycle (55.56% vs. 45.73%) were observed in the prolonged protocol. CONCLUSION(S): Prolonged down-regulation in a GnRH-a protocol might increase the live-birth rates in normogonadotropic women.

Song, J., et al. (2020). "Comparison of GnRH-a Prolonged Protocol and Short GnRH-a Long Protocol in Patients with Thin Endometrium for Assisted Reproduction: A Retrospective Cohort Study." Drug Des Devel Ther 14: 3673–3682.

PURPOSE: Gonadotrophin releasing hormone agonist (GnRH-a) is widely used for pituitary down-regulation and recruiting more follicles in assisted reproduction. However, no information is available on its value for patients with thin endometrial thickness. PATIENTS AND METHODS: This was a retrospective cohort study of 302 patients with endometrium <8 mm undergoing fresh embryo transfer at a fertility center of a university hospital from January 2016 and December 2018. In 148 cycles of the GnRH-a prolonged protocol, one depot of 3.75 mg GnRH-a was injected on day 2 of the menstrual cycle, while in 154 cycles of the short GnRH-a long protocol, 0.1 mg of GnRH-a was injected daily from the mid-luteal phase. The live birth rate and clinical pregnancy rate were compared between the two groups. Other outcome measures included the implantation rate, miscarriage rate, and characteristics of stimulation procedures. RESULTS: Live birth rates and clinical pregnancy rates were significantly higher in the GnRH-a prolonged protocol group than in the other group (36.5% vs 20.8%, P=0.002; 43.9% vs 28.2%, P=0.006, respectively). The live birth rate was significantly increased in the prolonged protocol group (crude OR: 2.190, 95% CI: 1.311, 3.660; adjusted OR: 2.458, 95% CI: 1.430, 4.224) compared with that in the reference group. The implantation rate of the former group was also significantly higher than that of the latter group (35.4% vs 15.9%, P=0.000). There was no significant difference in miscarriage rates between the two protocols. In terms of stimulation procedures, the GnRH-a prolonged protocol group required significantly higher Gn time (10.9 vs 9.5 days, P=0.000) and Gn consumption (2625.0 vs 2047.5 IU, P=0.000) than the short GnRH-a long protocol group. CONCLUSION: The GnRH-a prolonged protocol in fresh embryo transfer cycles yielded better clinical outcomes of patients with thin endometrium than the short GnRH-a long protocol.

Tian, L. F., et al. (2019). "Mild starting dosage ovarian stimulation combined with a modified prolonged GnRH-a protocol improved IVF/ICSI outcomes in normal ovarian responders." Arch Med Sci 15(5): 1294–1300.

INTRODUCTION: Controlled ovarian hyperstimulation (COH) is essential for artificial reproduction technology (ART). This study aimed to evaluate the effects of a mild starting dosage of r-FSH ovarian stimulation after the modified prolonged GnRH-a down-regulation protocol for COH on the clinical outcomes in normal ovarian responders undergoing in vitro fertilization/intracytoplasmic sperm injection-embryo transfer (IVF/ICSI-ET). MATERIAL AND METHODS: In the retrospective study, the patients were separated into two groups according to the starting dosage of r-FSH: a mild dosage group (75 IU </= r-FSH < 150 IU, n = 858) and a conventional dosage group (150 IU </= r-FSH </= 225 IU, n = 535). Data were collected from clinical records. The baseline characteristics and clinical outcomes were compared between the two groups. RESULTS: Although the duration of r-FSH treatment was a little longer in the mild dosage group, the total r-FSH dosage and the cost of ovarian stimulation were significantly lower than those in the conventional dosage group. Furthermore, compared to the conventional dosage group, the number of retrieved oocytes was also lower in the mild dosage group, whereas the rates of two pronuclei (2PN) fertilized oocytes and good-quality embryos were remarkable higher. The implantation rate, clinical pregnancy rate and live birth rate were significantly higher in the mild dosage group. There was no difference in early miscarriages rate, incidence of moderate and severe ovarian hyper-stimulation syndrome (OHSS) or incidence of ectopic pregnancy between the two groups. CONCLUSIONS: The modified prolonged GnRH-a pituitary down-regulation regimen combined with mild r-FSH starting dosage improved IVF/ICSI outcomes and reduced the financial cost in normal ovarian responders.

Xu, B., et al. (2020). "The depot GnRH agonist protocol improves the live birth rate per fresh embryo transfer cycle, but not the cumulative live birth rate in normal responders: a randomized controlled trial and molecular mechanism study." Hum Reprod 35(6): 1306–1318.

STUDY QUESTION: Do cumulative live birth rates (CLBRs) after one complete ART cycle differ between the three commonly used controlled ovarian stimulation (COS) protocols (GnRH antagonist, depot GnRHa (GnRH agonist) and long GnRHa) in normal responders undergoing IVF/ICSI? SUMMARY ANSWER: There were similar CLBRs between the GnRH antagonist, depot GnRHa and long GnRHa protocols. WHAT IS KNOWN ALREADY: There is no consensus on which COS protocol is the most optimal in women with normal ovarian response. The CLBR provides the final success rate after one complete ART cycle, including the fresh and all subsequent frozen-thawed embryo transfer (ET) cycles. We suggest that the CLBR measure would allow for better comparisons between the different treatment protocols. STUDY DESIGN, SIZE, DURATION: A prospective controlled, randomized, open label trial was performed between May 2016 and May 2017. A total of 819 patients were allocated to the GnRH antagonist, depot GnRHa or long GnRHa protocol in a 1:1:1 ratio. The minimum follow-up time from the first IVF cycle was 2 years. To further investigate the potential effect of COS with the GnRH antagonist, depot GnRHa or long GnRHa protocol on endometrial receptivity, the expression of homeobox A10 (HOXA10), myeloid ecotropic viral integration site 1 (MEIS1) and leukemia inhibitory factor (LIF) endometrial receptivity markers was evaluated in endometrial tissue from patients treated with the different COS protocols. PARTICIPANTS/MATERIALS, SETTING, METHODS: Infertile women with normal ovarian response (n = 819) undergoing IVF/ICSI treatment were randomized to the GnRH antagonist, depot GnRHa or long GnRHa protocol. Both IVF and ICSI cycles were included, and the sperm samples used were either fresh or frozen partner ejaculates or frozen donor ejaculates. The primary outcome was the live birth rate (LBR) per fresh ET cycle, and the CLBR after one complete ART cycle, until the birth of a first child (after 28 weeks) or until all frozen embryos were used, whichever occurred first. Pipelle endometrial biopsies from 34 female patients were obtained on Days 7-8 after oocyte retrieval or spontaneous ovulation in natural cycles, respectively, and HOXA10, MEIS1 and LIF mRNA and protein expression levels in the human endometrium was determined by quantitative real-time PCR and western blot, respectively. MAIN RESULTS AND THE ROLE OF CHANCE: There were no significant differences in CLBRs between the GnRH antagonist, depot GnRHa or long GnRHa protocol (71.4 versus 75.5 versus 72.2%, respectively). However, there was a significantly higher LBR per fresh ET cycle in the depot GnRHa protocol than in the long GnRHa and GnRH antagonist protocols (62.6 versus 52.1% versus 45.6%, P < 0.05). Furthermore, HOXA10, MEIS1 and LIF mRNA and protein expression in endometrium all showed significantly higher in the depot GnRHa protocol than in the long GnRHa and GnRH antagonist protocols (P < 0.05). LIMITATIONS, REASONS FOR CAUTION: A limitation of our study was that both our clinicians and patients were not blinded to the randomization for the randomized controlled trial (RCT). An inclusion criterion for the current retrospective cohort study was based on the 'actual ovarian response' during COS treatment, while the included population for the RCT was 'expected normal responders' based on maternal age and ovarian reserve test. In addition, the analysis was restricted to patients under 40 years of age undergoing their first IVF cycle. Furthermore, the endometrial tissue was collected from patients who cancelled the fresh ET, which may include some patients at risk for ovarian hyperstimulation syndrome, however only patients with 4-19 oocytes retrieved were included in the molecular study. WIDER IMPLICATIONS OF THE FINDINGS: The depot GnRH agonist protocol improves the live birth rate per fresh ET cycle, but not the cumulative live birth rate in normal responders. A possible explanation for the improved LBR after fresh ET in the depot GnRHa protocol could be molecular signalling at the level of endometrial receptivity. STUDY FUNDING/COMPETING INTEREST(S): This project was funded by Grant 81571439 from the National Natural Sciences Foundation of China and Grant 2016YFC1000206-5 from the National Key Research & Development Program of China. The authors declare no conflict of interest. TRIAL REGISTRATION NUMBER: The RCT trial was registered at the Chinese Clinical Trial Registry, Study Number: ChiCTR-INR-16008220. TRIAL REGISTRATION DATE: 5 April 2016. DATE OF FIRST PATIENT'S ENROLLMENT: 12 May 2016.

La Marca, A. and S. K. Sunkara (2014). "Individualization of controlled ovarian stimulation in IVF using ovarian reserve markers: from theory to practice." Hum Reprod Update 20(1): 124–140.

BACKGROUND: The main objective of individualization of treatment in IVF is to offer every single woman the best treatment tailored to her own unique characteristics, thus maximizing the chances of pregnancy and eliminating the iatrogenic and avoidable risks resulting from ovarian stimulation. Personalization of treatment in IVF should be based on the prediction of ovarian response for every individual. The starting point is to identify if a woman is likely to have a normal, poor or a hyper response and choose the ideal treatment protocol tailored to this prediction. The objective of this review is to summarize the predictive ability of ovarian reserve markers, such as antral follicle count (AFC) and anti-Mullerian hormone (AMH), and the therapeutic strategies that have been proposed in IVF after this prediction. METHODS: A systematic review of the existing literature was performed by searching Medline, EMBASE, Cochrane library and Web of Science for publications in the English language related to AFC, AMH and their incorporation into controlled ovarian stimulation (COS) protocols in IVF. Literature available to May 2013 was included. RESULTS: The search generated 305 citations of which 41 and 25 studies, respectively, reporting the ability of AMH and AFC to predict response to COS were included in this review. The literature review demonstrated that AFC and AMH, the most sensitive markers of ovarian reserve identified to date, are ideal in planning personalized COS protocols. These sensitive markers permit prediction of the whole spectrum of ovarian response with reliable accuracy and clinicians may use either of the two markers as they can be considered interchangeable. Following the categorization of expected ovarian response to stimulation clinicians can adopt tailored therapeutic strategies for each patient. Current scientific trend suggests the elective use of the GnRH antagonist based regimen for hyper-responders, and probably also poor responders, as likely to be beneficial. The selection of the appropriate and individualized gonadotrophin dose is also of paramount importance for effective COS and subsequent IVF outcomes. CONCLUSION: Personalized IVF offers several benefits; it enables clinicians to give women more accurate information on their prognosis thus facilitating counselling especially in cases of extremes of ovarian response. The deployment of therapeutic strategies based on selective use of GnRH analogues and the fine tuning of the gonadotrophin dose on the basis of potential ovarian response in every single woman can allow for a safer and more effective IVF practice.

Toftager, M., et al. (2017). "Cumulative live birth rates after one ART cycle including all subsequent frozen-thaw cycles in 1050 women: secondary outcome of an RCT comparing GnRH-antagonist and GnRH-agonist protocols." Hum Reprod 32(3): 556–567.

STUDY QUESTION: Are cumulative live birth rates (CLBRs) similar in GnRH-antagonist and GnRH-agonist protocols for the first ART cycle including all subsequent frozen-thaw cycles from the same oocyte retrieval? SUMMARY ANSWER: The chances of at least one live birth following utilization of all fresh and frozen embryos after the first ART cycle are similar in GnRH-antagonist and GnRH-agonist protocols. WHAT IS KNOWN ALREADY: Reproductive outcomes of ART treatment are traditionally reported as pregnancies per cycle or per embryo transfer. However, the primary concern is the overall chance of a live birth. After the first ART cycle with fresh embryo transfer, we found live birth rates (LBRs) of 22.8% and 23.8% (P = 0.70) for the GnRH-antagonist and GnRH-agonist protocols, respectively. But with CLBRs including both fresh and frozen embryos from the first oocyte retrieval, chances of at least one live birth increases. There are no previous randomized controlled trials (RCTs) comparing CLBRs in GnRH-antagonist versus GnRH-agonist protocols. Previous studies on CLBR are either retrospective cohort studies including multiple fresh cycles or RCTs comparing single embryo transfer (SET) with double embryo transfer (DET). STUDY DESIGN, SIZE, DURATION: CLBR was a secondary outcome in a Phase IV, dual-center, open-label, RCT including 1050 women allocated to a short GnRH-antagonist or a long GnRH-agonist protocol in a 1:1 ratio over a 5-year period using a web-based concealed randomization code. The minimum follow-up time from the first IVF cycle was 2 years. The aim was to compare CLBR between the two groups following utilization of all fresh and frozen embryos from the first ART cycle. PARTICIPANTS/MATERIALS, SETTING, METHODS: All women referred for their first ART cycle at two public fertility clinics, <40 years of age were approached. A total of 1050 subjects were allocated to treatment and 1023 women started standardized ART protocols with recombinant human follitropin-beta (rFSH) stimulation. Day-2 SET was planned and additional embryos were frozen and used in subsequent frozen-thawed cycles. All pregnancies generated from oocyte retrieval during the first IVF cycle including fresh and frozen-thaw cycles were registered. Ongoing pregnancy was determined by ultrasonography at gestational week 7-9 and live birth was irrespective of the duration of gestation. CLBR was defined as at least one live birth per allocated woman after fresh and frozen cycles. Subjects were censored out after the first live birth. Cox proportional hazard model was used to evaluate the relative prognostic significance of female age, BMI, the number of retrieved oocytes and the diagnosis of infertility in relation to the CLBR. MAIN RESULTS AND THE ROLE OF CHANCE: Baseline characteristics were similar and equal proportions of patients continued with frozen-thaw (frozen embryo transfer, FET) cycles after their fresh ART cycle in the GnRH-antagonist and GnRH-agonist arms. When combining all fresh and frozen-thaw embryo transfers from first oocyte retrieval with a minimum of 2-year follow-up, the CLBR was 34.1% (182/534) in the GnRH-antagonist group versus 31.2% (161/516) in the GnRH-agonist group (odds ratio (OR):1.14; 95% CI: 0.88-1.48, P = 0.32). Mean time to the first live birth was 11.0 months in the GnRH-antagonist group compared to 11.5 months in the GnRH-agonist group (P < 0.01). The total number of deliveries from all FET cycles where embryos were thawed were higher in the antagonist group 64/330 (19.4%) compared to the agonist group 43/355 (12.1%) ((OR): 1.74; 95% CI: 1.14-2.66, P = 0.01). The evaluation of prognostic factors showed that more retrieved oocytes were associated with a significantly higher CLBR in both treatment groups. For the subgroup of obese women (BMI >30 kg/m2), the CLBR was significantly higher in the GnRH-antagonist group (P = 0.02). LIMITATIONS, REASONS FOR CAUTION: The duration of the trial is a possible limitation with introduction of new methods as 'Freeze all' and 'GnRH-agonist triggering', but as these treatments were used in only few women, a systematic bias is not likely. Blastocyst culture of surplus embryos for freezing was introduced to both groups simultaneously, thereby minimizing the risk of bias. Furthermore, with a minimum of 2-year follow-up, a minority (<1%) still had cryopreserved embryos and no live birth at the end of the trial. The post hoc prognostic covariate analyses with multiple strata should be interpreted with caution. Finally, the physicians were not blinded to GnRH treatment group after randomization. WIDER IMPLICATIONS OF THE FINDINGS: With the improvement of embryo culture, freezing and thawing methods as well as a strategy of elective SET, CLBR until first live birth provides an all-inclusive success rate for ART. When comparing GnRH-antagonist and GnRH-agonist protocols, we find similar CLBRs, despite more oocytes being retrieved in the GnRH-agonist protocol. STUDY FUNDING/COMPETING INTERESTS: An unrestricted research grant is funded by Merck Sharp & Dohme Corp., a subsidiary of Merck & Co., Inc., Kenilworth, NJ, USA (MSD). The funders had no influence on the data collection, analyses or conclusions of the study. No conflict of interests to declare. TRIAL REGISTRATION NUMBER: EudraCT #: 2008-005452-24. ClinicalTrial.gov: NCT00756028. TRIAL REGISTRATION DATE: 18 September 2008. DATE OF FIRST PATIENT'S ENROLLMENT: 14 January 2009.

Wei, D., et al. (2025). "Frozen versus fresh embryo transfer in women with low prognosis for in vitro fertilisation treatment: pragmatic, multicentre, randomised controlled trial." BMJ 388: e081474.

OBJECTIVE: To test the hypothesis that a freeze-all strategy would increase the chance of live birth compared with fresh embryo transfer in women with low prognosis for in vitro fertilisation (IVF) treatment. DESIGN: Pragmatic, multicentre, randomised controlled trial. SETTING: Nine academic fertility centres in China. PARTICIPANTS: 838 women with a low prognosis for IVF treatment defined by </=9 oocytes retrieved or poor ovarian reserve (antral follicle count <5 or serum anti-Mullerian hormone level <8.6 pmol/L). INTERVENTIONS: Eligible participants were randomised (1:1) to undergo either frozen embryo transfer or fresh embryo transfer on the day of oocyte retrieval. Participants in the frozen embryo transfer group had all of their embryos cryopreserved and underwent frozen embryo transfer later. Participants in the fresh embryo transfer group underwent fresh embryo transfer after oocyte retrieval. MAIN OUTCOME MEASURES: The primary outcome was live birth, defined as the delivery of neonates with a heartbeat and respiration at >/=28 weeks' gestation. Secondary outcomes were clinical pregnancy, singleton or twin pregnancy, pregnancy loss, ectopic pregnancy, birth weight, maternal and neonatal complications, and cumulative live birth after embryo transfers within one year after randomisation. RESULTS: In an intention-to-treat analysis, the rate of live birth was lower in the frozen embryo transfer group than in the fresh embryo transfer group (32% (132 of 419) v 40% (168 of 419); relative ratio 0.79 (95% confidence interval 0.65 to 0.94); P=0.009). The frozen embryo group had a lower rate of clinical pregnancy than the fresh embryo group (39% (164 of 419) v 47% (197 of 419); 0.83 (0.71 to 0.97)). The cumulative live birth rate was lower in the frozen embryo transfer group compared with the fresh embryo transfer group (44% (185 of 419) v 51% (215 of 419), 0.86 (0.75 to 0.99)). No difference was observed in birth weight, incidence of obstetric complications, or risk of neonatal morbidities. CONCLUSIONS: Fresh embryo transfer may be a better choice for women with low prognosis in terms of live birth rate compared with a freeze-all strategy. The treatment strategies that prevent fresh embryo transfers, such as accumulating embryos with back-to-back cycles or performing routine preimplantation genetic testing for aneuploidy, warrant further studies in women with a low prognosis. TRIAL REGISTRATION: Chinese Clinical Trial Registry ChiCTR2100050168.

Stimulation, E. G. G. o. O., et al. (2026). "ESHRE guideline: ovarian stimulation for IVF/ICSI: an update in 2025dagger." Hum Reprod.

STUDY QUESTION: What is the recommended management of ovarian stimulation, based on the best available evidence in the literature? SUMMARY ANSWER: This updated ESHRE guideline on ovarian stimulation for IVF/ICSI provides 121 recommendations, answering 21 key questions on ovarian stimulation for IVF/ICSI. WHAT IS KNOWN ALREADY? Before the ESHRE guideline on ovarian stimulation for IVF/ICSI was published in 2019, ovarian stimulation for IVF/ICSI had only been discussed briefly in the National Institute for Health and Care Excellence guideline on fertility problems and in a statement by the Royal Australian and New Zealand College of Obstetricians and Gynaecologists. STUDY DESIGN, SIZE, DURATION: The guideline was developed according to the structured methodology for ESHRE guidelines. The 18 key questions from the 2019 version of the guideline were revised by the Guideline Development Group (GDG). This resulted in the addition of one new key question, the splitting of the key question on fertility preservation in three separate key questions (fertility preservation for women facing gonadotoxic treatment, elective oocyte cryopreservation, and oocyte donation) and several new interventions being added to the existing key questions. Papers published between 31 October 2018 and 2 February 2025 and written in English were included. The critical outcomes for this guideline were efficacy in terms of cumulative live birth rate per started cycle or live birth rate per started cycle, as well as safety in terms of the rate of occurrence of moderate and/or severe ovarian hyperstimulation syndrome (OHSS). PARTICIPANTS/MATERIALS, SETTING, METHODS: Based on the available evidence, recommendations were formulated and discussed until consensus was reached within the GDG. Following stakeholder review of the initial draft, the final version was approved by the GDG and ultimately by the ESHRE Executive Committee. MAIN RESULTS AND THE ROLE OF CHANCE: The guideline provides a total of 121 recommendations: 42 recommendations remained unchanged in 2019, 4 recommendations were reworded for better understanding, 29 recommendations were updated in view of new evidence, and 46 new recommendations for 2025 have been formulated. The guideline provides 4 recommendations on pre-stimulation evaluation, 7 recommendations on pre-treatment therapies, 50 recommendations on pituitary suppression and ovarian stimulation, 17 recommendations on monitoring, 18 recommendations on triggering of final oocyte maturation and luteal support, and 8 recommendations on the prevention of OHSS. In addition, the guideline provides 17 recommendations on fertility preservation, both oncologic and elective, and oocyte donation. These include 90 evidence-based recommendations, of which only 42 were formulated as strong recommendations and 48 as conditional, as well as 29 good practice points and 2 research-only recommendations. Of the evidence-based recommendations, none were supported by high-quality evidence, 6 by moderate-quality evidence, 36 by low-quality evidence, and 148 by very low-quality evidence. To support future research on ovarian stimulation for IVF/ICSI, a list of research recommendations was provided. LIMITATIONS, REASONS FOR CAUTION: Several newer interventions are not well studied yet. For most of these interventions, a recommendation against the intervention or a research-only recommendation was formulated based on insufficient evidence. Future studies may require these recommendations to be revised. WIDER IMPLICATIONS OF THE FINDINGS: The guideline provides clinicians with clear advice on best practice in ovarian stimulation, based on the best evidence available. In addition, a list of research recommendations is provided to promote further studies in ovarian stimulation. STUDY FUNDING/COMPETING INTEREST(S): The guideline was developed by ESHRE, who funded the guideline meetings, literature searches, and dissemination of the guideline. The guideline group members did not receive any financial incentives; all work was provided voluntarily. BA reports speaker's fees from Gedeon-Richter, Ferring, IBSA, Intas, Merck, Organon, consulting fees from Merck, Organon, Oxolife, stock options from Global Fertility Solutions LLC (employee co-investment), and was chair of the Turkish Society of Reproductive Medicine. EB reports research grants from Roche Diagnostics and IBSA, consulting fees from MSD, Abbot, Gedeon-Richter, Roche, speaker's fees from IBSA, MSD, Ferring Pharmaceuticals, Abbot, Gedeon-Richter, Merck, Roche, participation in the advisory board of Ferring Pharmaceuticals, IBSA and Merck, and ownership interest from IVI-RMS Valencia. GG was part of the ESHRE working group on Recurrent Implantation Failure and the ESHRE working group on clinical KPISs, reports travel support from Merck, Organon, Ferring, Theramex, Gedeon-Richter, Abbott, consulting fees from Organon, Ferring, Merck, Gedeon-Richter, Theramex, Abbott, ReproNovo, Igyxos, OxoLife, Philipps, ReprodWissen, PregLem, Guerbet, Roche, IBSA, and Besins, speaker's fees from Organon, Ferring, Merck, Gedeon-Richter, Theramex, Abbott, ReproNovo, Igyxos, OxoLife, Philipps, ReprodWissen, PregLem, Guerbet, Roche, IBSA, and Besins, and research grants from Besin, Merck, Abbott, Ferring, Theramex. MG reports speaker's fees from Merck Serono, Ferring, and Gedeon Richter. EK reports travel/hotel expenses from Ferring, Merck SERONO, Vianex, speaker's fees from Ferring, Merck SERONO, Vianex, and is chair of the Greek Society of Fertility and Sterility. MK reports travel support and speaker's fees from Ferring. ALM reports research grants from Merck, Ferring, IBSA, Roche, Organon, Theramex, Beckman Coulter, and Gedeon-Richter, consulting fees from Merck, Ferring, IBSA, Roche, Organon, Theramex, Beckman Coulter, and Gedeon-Richter, speaker's fees from Merck, Ferring, IBSA, Roche, Organon, Theramex, Beckman Coulter, Gedeon-Richter, and participation on an advisory board of Merck, Organon, Ferring, Theramex, Gedeon Richter, and IBSA. GL reports consulting fees from Ferring and Merck, speaker's fees from Ferring, Merck, Gedeon-Richter, Organon, and Vianex, expert testimony fees from Cook, travel support from ESHRE, Ferring, Merck, Gedeon-Richter, Organon, and Vianex, is on the advisory board of Merck and Ferring, and participated in an ESHRE committee and on the Greek Fertility and Sterility Committee. NM reports research grants from IBSA, Organon, consulting fees from Organon, Merck, GE, Ferring, Abbott, and Cooper, and speaker's fees from Ferring, GE, Organon, IBSA, Merck, Theramex. NPP reports research grants from Besins Healthcare, Ferring Pharmaceutical, Merck Serono, Organon, Roche Diagnostics, and Theramex, consulting fees from Besins Healthcare, Alife, Ferring, IBSA, Merck Serono, Organon, Abbott, FertilAI, and speaker's fees from Besins Healthcare, Roche Diagnostics, Ferring Pharmaceuticals, Gedeon-Richter, IBSA, Merck Serono, Organon, and Theramex. SKS reports a research grant from Ferring, travel support from Merck and INTAS, consulting fees from Merck, and speaker's fees from Merck, MSD, INTAS, and Ferring. TT reports travel support from Merck, speaker's fees from Merck, Organon, MSD and is editor-in-chief of a Bulgarian journal, Reproductive Health. MT reports travel support from IBSA, Ferring, and Merck, consulting fees from Abbott and is a member of the board of the Finnish Endocrine Society. JU is a member of the Steering Committee of Richter Reproduction Network and received travel support from IBSA. FB reports a research grant from Besins, is on the advisory board of Merck and Abbott, reports speaker's fees from Ferring, Merck, Besins, Intas Fermaceuticals, PREIS School; he is the owner of FRANKSCHOOL RforL. The other authors have nothing to disclose. TRIAL REGISTRATION NUMBER: N/A. DISCLAIMER: This guideline represents the views of ESHRE, which were achieved after careful consideration of the scientific evidence available at the time of preparation. In the absence of scientific evidence on certain aspects, a consensus between the relevant ESHRE stakeholders has been obtained.Adherence to these clinical practice guidelines does not guarantee a successful or specific outcome, nor does it establish a standard of care. Clinical practice guidelines do not replace the need for application of clinical judgment to each individual presentation, nor variations based on locality and facility type.ESHRE makes no warranty, express or implied, regarding the clinical practice guidelines and specifically excludes any warranties of merchantability and fitness for a particular use or purpose. (The full disclaimer is available at www.eshre.eu/guidelines.).

Melo, P., et al. (2025). "Controlled ovarian stimulation protocols for assisted reproduction: a network meta-analysis." Cochrane Database Syst Rev 7(7): CD012586.

BACKGROUND: Controlled ovarian stimulation (COS) is an essential step in most assisted conception cycles. Different treatment combinations (termed protocols) exist in COS, yet there is no consensus on their relative effectiveness and safety. OBJECTIVES: We aimed to assess the relative effectiveness and safety of COS protocols in clinical practice. SEARCH METHODS: We followed standard Cochrane methodology to conduct extensive electronic searches to 11 June 2024. SELECTION CRITERIA: We included randomised controlled trials (RCTs) comparing at least two COS protocols using any form of pituitary suppression (gonadotrophin-releasing hormone (GnRH) agonists, antagonists or progestogens) and human menopausal gonadotropin (hMG), urinary or recombinant follicle-stimulating hormone (u/rFSH), with or without luteinising hormone (LH) and/or oral medications (e.g. clomifene or letrozole), for ovarian stimulation. The primary outcomes were the rates of live birth or ongoing pregnancy (LBR or OPR) and ovarian hyperstimulation syndrome (OHSS) per participant after one stimulation cycle. The secondary outcomes were the rates of clinical pregnancy, miscarriage, multiple pregnancy, ectopic pregnancy and cycle cancellation per participant, and the number of oocytes, cleavage-stage embryos, blastocyst-stage embryos and cryopreserved embryos per participant. DATA COLLECTION AND ANALYSIS: Two review authors independently selected studies and extracted data. We conducted pairwise and network meta-analyses (NMA) according to participants' predicted response to COS (normal/unselected, high or low). For each outcome and subgroup of women, we grouped treatment protocols into the following different networks: all pituitary suppression methods; all long GnRH agonist protocols; all short GnRH antagonist protocols; all GnRH agonist flare protocols; all protocols using progestogens for pituitary suppression; and all protocols using ovarian stimulation in the absence of pituitary suppression. Using the Cochrane RoB 1 tool, we restricted our primary analyses to RCTs at low risk of 'selection' and 'other' biases. We presented effect estimates as risk ratios (RR) for dichotomous outcomes, or mean difference (MD) for continuous outcomes, with 95% confidence intervals (CI). We used Review Manager and Stata 18 for the meta-analyses. MAIN RESULTS: We included 338 studies investigating a total of 15 pairwise comparisons between different COS protocols in 59,086 women. Of these, 226 trials included only women with predicted normal response or whose predicted response was unstated, 31 trials included only women with predicted high response and 81 trials included only women with predicted low response. Primary outcome (effectiveness) - LBR or OPR per woman randomised Pituitary suppression methods In women with predicted normal response, short antagonist protocols probably result in little to no difference in LBR or OPR versus long agonist protocols (RR 0.95, 95% CI 0.84 to 1.07; 8 studies, 2817 women; I(2) = 0%; moderate-certainty evidence). Network evidence also suggested that ovarian stimulation without pituitary suppression may reduce the LBR or OPR compared with short GnRH antagonist protocols (RR 0.71, 95% CI 0.57 to 0.90; low-certainty evidence) and with GnRH agonist flare protocols (RR 0.52, 95% CI 0.36 to 0.75; low-certainty evidence). Primary outcome (safety) - OHSS per woman randomised Pituitary suppression methods In women with predicted normal response, short GnRH antagonist protocols may reduce OHSS compared with long GnRH agonist protocols (RR 0.88, 95% CI 0.78 to 0.99; 7 studies, 2650 women; I(2) = 0%; low-certainty evidence). Short GnRH antagonist protocols In women with predicted high response receiving short GnRH antagonist protocols, hMG may reduce OHSS compared with rFSH (RR 0.45, 95% CI 0.3 to 0.68; 1 study, 619 women; low-certainty evidence). Secondary outcomes Clinical pregnancy Pituitary suppression methods In women with predicted normal response, network evidence suggested that ovarian stimulation without pituitary suppression lowers the clinical pregnancy rate compared with short GnRH antagonist protocols (RR 0.76, 95% CI 0.61 to 0.93; low-certainty evidence) and with GnRH agonist flare protocols (RR 0.60, 95% CI 0.44 to 0.82; low-certainty evidence). Cancellation Short GnRH antagonist protocols In women with predicted high response undergoing short GnRH antagonist protocols, hMG may increase cancellation compared with rFSH (RR 5.98, 95% CI 1.78 to 20.10; 1 study, 619 women; low-certainty evidence). For the remaining networks and participant subgroups (normal- and low-responding women), the evidence did not confidently identify differences between COS protocols and is not reported in the abstract. Oocyte number Pituitary suppression methods In women with predicted normal response, short GnRH antagonist protocols (MD -0.75, 95% CI -1.49 to -0.02; 17 studies, 4062 women; I(2) = 94%; low-certainty evidence), GnRH agonist flare protocols (MD -3.30, 95% CI -4.87 to -1.73; 1 study, 240 women; I(2) = 96%; low-certainty evidence) and protocols without pituitary suppression (MD -5.80, 95% CI -11.24 to -0.36; 2 studies, 714 women; low-certainty evidence) may lower the oocyte number compared with long GnRH agonist protocols, respectively. In women with predicted low response, short GnRH antagonist protocols may reduce the oocyte number versus long agonist protocols (MD -1.25, 95% CI -2.01 to -0.50; low-certainty evidence). Long GnRH agonist protocols In women with predicted normal response receiving long GnRH agonist protocols, combining rFSH and rLH reduces the oocyte number compared with rFSH alone (MD -0.81, 95% CI -1.33 to -0.28; 6 trials, 1289 women; I(2) = 0%; high-certainty evidence). Remaining evidence For the remaining networks, patient subgroups and secondary outcomes, the evidence did not confidently identify differences between COS protocols. AUTHORS' CONCLUSIONS: Short GnRH antagonist protocols may reduce OHSS rates in women with predicted normal response without compromising LBR or OPR. Ovarian stimulation without pituitary suppression may reduce the LBR or OPR compared with short GnRH antagonist protocols and with GnRH agonist flare protocols. In women with predicted high response receiving short GnRH antagonist protocols, hMG may reduce OHSS compared with rFSH. We were unable to meta-analyse results from 169 trials due to serious risk of selection or other biases, a lack of outcome data, or because of data reported in an unsuitable format for meta-analysis (e.g. per cycle); this led to underpowered analyses for several outcomes and pairwise comparisons. Future trials should focus on evaluating the effect of different COS protocols upon cumulative live birth rates, accounting for all embryo transfers (fresh and/or frozen) after a single stimulation cycle per participant.

Lobo, R., et al. (2025). "One-year cumulative live birth rate associated with the number of oocytes in ovarian stimulation with follitropin delta: a pooled analysis of four randomized controlled trials." Hum Reprod 40(8): 1526–1534.

STUDY QUESTION: What number of oocytes retrieved is associated with the highest cumulative live birth rates (CLBRs) in the fresh and subsequent frozen cycles following ovarian stimulation with follitropin delta? SUMMARY ANSWER: The CLBR increased with the number of oocytes retrieved, plateauing at 21-25 oocytes. WHAT IS KNOWN ALREADY: Live birth rate (LBR) per fresh cycle is the conventionally reported outcome of IVF; however, the marked increase in cryopreserved cycles in recent years suggests that the CLBR has emerged as a more relevant outcome. In the fresh cycle, the number of oocytes retrieved is regarded as a prognostic factor for LBR, and a similar association has been shown for CLBR. STUDY DESIGN, SIZE, DURATION: Pooled analysis including 1746 patients from four randomized controlled trials. Trials were identified from clinical trials available in the Ferring Pharmaceuticals database up to June 2023. Selected trials used follitropin delta for ovarian stimulation and collected outcome data from both fresh and frozen cycles. Follitropin delta dose-response trials, as well as trials investigating follitropin delta in repeated ovarian stimulation cycles, were excluded. Patients included in the analysis underwent ovarian stimulation with follitropin delta and had at least one oocyte retrieved. The outcome of CLBR in the fresh and subsequent frozen cycles was evaluated in relation to the number of oocytes retrieved. CLBR was calculated as the number of patients with at least one live birth divided by the number of all patients included in the analysis. PARTICIPANTS/MATERIALS, SETTING, METHODS: Trial participants were women, 18-42 years of age, who were undergoing their first or second IVF/ICSI cycle in a GnRH antagonist/agonist protocol. Triggering was performed with hCG or GnRH agonist, and insemination was performed by IVF or ICSI. Single or double blastocyst transfer was performed on Day 5 in the fresh cycle, and all viable surplus blastocysts were cryopreserved on Day 5 or Day 6. All pregnancies from the fresh cycle and frozen cycles initiated within 1 year after the start of stimulation were followed until birth. The association between the number of oocytes retrieved and CLBR was assessed using a logistic regression analysis with fractional polynomials to obtain predicted CLBR. Subgroup analyses were performed based on age, anti-Mullerian hormone (AMH), and number of oocytes retrieved. MAIN RESULTS AND THE ROLE OF CHANCE: Overall, 15 trials with follitropin delta were identified in the database. Of those, 11 trials were not eligible, and the remaining 4 trials were included. In total, 1746 patients were included in the analysis. The mean age was 33.8 years (range 21-42 years), and the median AMH level was 17.0 pmol/l (range 0.3-164.2 pmol/l). The vast majority of patients (1645 patients, 94.2%) were treated with a GnRH antagonist protocol, while 101 patients (5.8%) were treated with a GnRH agonist protocol. Overall, 1541 patients (88.3%) received hCG triggering, and 205 patients (11.7%) received GnRH agonist triggering. Frozen cycles (maximum of six) were initiated by 740 patients (42.4%). The study population underwent a total of 2948 cycles: 1746 fresh cycles (referring to ovarian stimulation cycles, with or without transfer) and 1202 frozen cycles (initiated cycles, with or without transfer). The mean number of oocytes retrieved was 12.4 (range 1-72), the fresh cycle LBR was 29.1%, and the CLBR was 51.4%. The CLBR increased with the number of oocytes retrieved up to a plateau starting at 21-25 oocytes. The CLBR reached above 60% at >15 oocytes and above 70% at >20 oocytes. The CLBR decreased with increasing age (57.1%, 51.6%, and 35.8% at <35, 35-37, and >/=38 years), while it was similar for AMH <15 and >/=15 pmol/l (52.0% and 50.9%, respectively). A continued increase in predicted CLBR from 15 oocytes retrieved was observed in older patients (>/=38 years); from 41.3% to 53.4% to 58.7% at 15-19, 20-24, and >/=25 oocytes. No equivalent benefit was observed in younger patients (<38 years), where corresponding rates were 72.5%, 68.0%, and 78.8% in patients <35 years and 70.3%, 73.1%, and 71.5% in patients 35-37 years. The fresh cycle LBR decreased beyond 14 oocytes, while the CLBR continued to increase by the number of oocytes retrieved. LIMITATIONS, REASONS FOR CAUTION: A limited number of patients included in the analysis had >/=20 oocytes retrieved (249 patients, 14.3%). WIDER IMPLICATIONS OF THE FINDINGS: This analysis suggests an increase in CLBR with the number of oocytes retrieved up to a plateau starting at 21-25 oocytes following ovarian stimulation cycles with follitropin delta and subsequent frozen cycles. An increase in CLBR from 20 oocytes was evident in older but not in younger patients. STUDY FUNDING/COMPETING INTEREST(S): The study was funded by Ferring Pharmaceuticals A/S, Copenhagen, Denmark. S.S.-R. has received research funding from Organon/MSD, Theramex, and Gedeon-Richter, consulting fees from Organon/MSD, Ferring Pharmaceuticals, Merck Serono, and IBSA, payment or honoraria from Organon/MSD, Besins and Gedeon-Richter, support for attending meetings from Gedeon-Richter and Besins, is an advisory board member for TTRANSPORT and Deputy of the ESHRE SQART SIG, and owns stocks of IVI Lisboa, Clinica de Reproducao assistida Lda. A.P. has received grants from Cryos, grants and payments from Gedeon Richter, Ferring Pharmaceuticals and Merck A/S, payments from Organon, consulting fees from IBSA, Ferring Pharmaceuticals, Gedeon Richter, Cryos, and Merck A/S, and travel support from Gedeon Richter. N.S.M. has received speaker and consultancy fees from Ferring Pharmaceuticals, IBSA, Merck, Freya, and Gedeon Richter, and is a shareholder in Verso Biosense. K.M. has been a scientific advisor for Calla Lily Clinical Care, Evvy, and AutoIVF. R.L., A.F., K.M., and I.E.J. are employees of Ferring Pharmaceuticals. REGISTRATION NUMBER: N/A.

Kuan, K. K. W., et al. (2023). "Comparing ART outcomes in women with endometriosis after GnRH agonist versus GnRH antagonist ovarian stimulation: a systematic review." Ther Adv Endocrinol Metab 14: 20420188231173325.

BACKGROUND: Endometriosis is an oestrogen-dependent disease that can cause subfertility in women who may require assisted reproductive technology (ART) to achieve their pregnancy goals. OBJECTIVES: The aim of this study was to compare ART outcomes in women with endometriosis following the long GnRH-agonist controlled ovarian stimulation (COS) protocol with those taking the GnRH-antagonist COS protocol. DATA SOURCES AND METHODS: MEDLINE, Embase and Web of Science were systematically searched in June 2022. Randomized controlled trials (RCTs) and observational studies comparing the long GnRH-agonist COS protocol and the GnRH-antagonist COS protocol in women with all stages/subtypes of endometriosis were included. Data were synthesized into comprehensive tables for systematic review. The Scottish Intercollegiate Guidelines Network (SIGN) checklists were used for the risk of bias assessment of non-randomized studies and randomized studies, and all the included studies were deemed to have acceptable quality. MAIN RESULTS: Eight studies (one RCT and seven observational) with 2695 patients (2761 cycles) were included. Most studies generally reported non-significant differences in clinical pregnancy or live birth rates regardless of the COS protocol used. However, the GnRH-agonist protocol may yield a higher total number of oocytes retrieved, especially mature oocytes. Conversely, the GnRH-antagonist protocol required a shorter COS duration and lower gonadotrophin dose. Adverse outcomes, such as rates of cycle cancellation and miscarriage, were similar between both COS protocols. CONCLUSION: Both the long GnRH-agonist and GnRH-antagonist COS protocols generally yield similar pregnancy outcomes. However, the long GnRH-agonist protocol may be associated with a higher cumulative pregnancy rate due to the higher number of retrieved oocytes available for cryopreservation. The underlying mechanisms of the two COS protocols on the female reproductive tract remain unclear. Clinicians should consider treatment costs, stage/subtype of endometriosis and pregnancy goals of their patients when selecting a GnRH analogue for COS. A well-powered RCT is needed to minimize the risk of bias and compare the risk for ovarian hyperstimulation syndrome. REGISTRATION: This review was prospectively registered at PROSPERO under Registration No. CRD42022327604.

Ren, J., et al. (2014). "Does prolonged pituitary down-regulation with gonadotropin-releasing hormone agonist improve the live-birth rate in in vitro fertilization treatment?" Fertil Steril 102(1): 75–81.

OBJECTIVE: To evaluate the effects of a prolonged duration of gonadotropin-releasing hormone agonist (GnRH-a) in pituitary down-regulation for controlled ovarian hyperstimulation (COH) on the live-birth rate in nonendometriotic women undergoing in vitro fertilization and embryo transfer (IVF-ET). DESIGN: Retrospective cohort study. SETTING: University-affiliated hospital. PATIENT(S): Normogonadotropic women undergoing IVF. INTERVENTION(S): Three hundred seventy-eight patients receiving a prolonged pituitary down-regulation with GnRH-a before ovarian stimulation and 422 patients receiving a GnRH-a long protocol. MAIN OUTCOME MEASURE(S): Live-birth rate per fresh ET. RESULT(S): In comparison with the long protocol, the prolonged down-regulation protocol required a higher total dose of gonadotropins. A lower serum luteinizing hormone (LH) level on the starting day of gonadotropin and the day of human chorionic gonadotropin (hCG) and a fewer number of oocytes and embryos were observed in the prolonged down-regulation protocol. However, the duration of stimulation and number of high-quality embryos were comparable between the two groups. A statistically significantly higher implantation rate (50.27% vs. 39.69%), clinical pregnancy rate (64.02% vs. 56.87%) and live-birth rate per fresh transfer cycle (55.56% vs. 45.73%) were observed in the prolonged protocol. CONCLUSION(S): Prolonged down-regulation in a GnRH-a protocol might increase the live-birth rates in normogonadotropic women.

Song, J., et al. (2020). "Comparison of GnRH-a Prolonged Protocol and Short GnRH-a Long Protocol in Patients with Thin Endometrium for Assisted Reproduction: A Retrospective Cohort Study." Drug Des Devel Ther 14: 3673–3682.

PURPOSE: Gonadotrophin releasing hormone agonist (GnRH-a) is widely used for pituitary down-regulation and recruiting more follicles in assisted reproduction. However, no information is available on its value for patients with thin endometrial thickness. PATIENTS AND METHODS: This was a retrospective cohort study of 302 patients with endometrium <8 mm undergoing fresh embryo transfer at a fertility center of a university hospital from January 2016 and December 2018. In 148 cycles of the GnRH-a prolonged protocol, one depot of 3.75 mg GnRH-a was injected on day 2 of the menstrual cycle, while in 154 cycles of the short GnRH-a long protocol, 0.1 mg of GnRH-a was injected daily from the mid-luteal phase. The live birth rate and clinical pregnancy rate were compared between the two groups. Other outcome measures included the implantation rate, miscarriage rate, and characteristics of stimulation procedures. RESULTS: Live birth rates and clinical pregnancy rates were significantly higher in the GnRH-a prolonged protocol group than in the other group (36.5% vs 20.8%, P=0.002; 43.9% vs 28.2%, P=0.006, respectively). The live birth rate was significantly increased in the prolonged protocol group (crude OR: 2.190, 95% CI: 1.311, 3.660; adjusted OR: 2.458, 95% CI: 1.430, 4.224) compared with that in the reference group. The implantation rate of the former group was also significantly higher than that of the latter group (35.4% vs 15.9%, P=0.000). There was no significant difference in miscarriage rates between the two protocols. In terms of stimulation procedures, the GnRH-a prolonged protocol group required significantly higher Gn time (10.9 vs 9.5 days, P=0.000) and Gn consumption (2625.0 vs 2047.5 IU, P=0.000) than the short GnRH-a long protocol group. CONCLUSION: The GnRH-a prolonged protocol in fresh embryo transfer cycles yielded better clinical outcomes of patients with thin endometrium than the short GnRH-a long protocol.

Tian, L. F., et al. (2019). "Mild starting dosage ovarian stimulation combined with a modified prolonged GnRH-a protocol improved IVF/ICSI outcomes in normal ovarian responders." Arch Med Sci 15(5): 1294–1300.

INTRODUCTION: Controlled ovarian hyperstimulation (COH) is essential for artificial reproduction technology (ART). This study aimed to evaluate the effects of a mild starting dosage of r-FSH ovarian stimulation after the modified prolonged GnRH-a down-regulation protocol for COH on the clinical outcomes in normal ovarian responders undergoing in vitro fertilization/intracytoplasmic sperm injection-embryo transfer (IVF/ICSI-ET). MATERIAL AND METHODS: In the retrospective study, the patients were separated into two groups according to the starting dosage of r-FSH: a mild dosage group (75 IU </= r-FSH < 150 IU, n = 858) and a conventional dosage group (150 IU </= r-FSH </= 225 IU, n = 535). Data were collected from clinical records. The baseline characteristics and clinical outcomes were compared between the two groups. RESULTS: Although the duration of r-FSH treatment was a little longer in the mild dosage group, the total r-FSH dosage and the cost of ovarian stimulation were significantly lower than those in the conventional dosage group. Furthermore, compared to the conventional dosage group, the number of retrieved oocytes was also lower in the mild dosage group, whereas the rates of two pronuclei (2PN) fertilized oocytes and good-quality embryos were remarkable higher. The implantation rate, clinical pregnancy rate and live birth rate were significantly higher in the mild dosage group. There was no difference in early miscarriages rate, incidence of moderate and severe ovarian hyper-stimulation syndrome (OHSS) or incidence of ectopic pregnancy between the two groups. CONCLUSIONS: The modified prolonged GnRH-a pituitary down-regulation regimen combined with mild r-FSH starting dosage improved IVF/ICSI outcomes and reduced the financial cost in normal ovarian responders.

Xu, B., et al. (2020). "The depot GnRH agonist protocol improves the live birth rate per fresh embryo transfer cycle, but not the cumulative live birth rate in normal responders: a randomized controlled trial and molecular mechanism study." Hum Reprod 35(6): 1306–1318.

STUDY QUESTION: Do cumulative live birth rates (CLBRs) after one complete ART cycle differ between the three commonly used controlled ovarian stimulation (COS) protocols (GnRH antagonist, depot GnRHa (GnRH agonist) and long GnRHa) in normal responders undergoing IVF/ICSI? SUMMARY ANSWER: There were similar CLBRs between the GnRH antagonist, depot GnRHa and long GnRHa protocols. WHAT IS KNOWN ALREADY: There is no consensus on which COS protocol is the most optimal in women with normal ovarian response. The CLBR provides the final success rate after one complete ART cycle, including the fresh and all subsequent frozen-thawed embryo transfer (ET) cycles. We suggest that the CLBR measure would allow for better comparisons between the different treatment protocols. STUDY DESIGN, SIZE, DURATION: A prospective controlled, randomized, open label trial was performed between May 2016 and May 2017. A total of 819 patients were allocated to the GnRH antagonist, depot GnRHa or long GnRHa protocol in a 1:1:1 ratio. The minimum follow-up time from the first IVF cycle was 2 years. To further investigate the potential effect of COS with the GnRH antagonist, depot GnRHa or long GnRHa protocol on endometrial receptivity, the expression of homeobox A10 (HOXA10), myeloid ecotropic viral integration site 1 (MEIS1) and leukemia inhibitory factor (LIF) endometrial receptivity markers was evaluated in endometrial tissue from patients treated with the different COS protocols. PARTICIPANTS/MATERIALS, SETTING, METHODS: Infertile women with normal ovarian response (n = 819) undergoing IVF/ICSI treatment were randomized to the GnRH antagonist, depot GnRHa or long GnRHa protocol. Both IVF and ICSI cycles were included, and the sperm samples used were either fresh or frozen partner ejaculates or frozen donor ejaculates. The primary outcome was the live birth rate (LBR) per fresh ET cycle, and the CLBR after one complete ART cycle, until the birth of a first child (after 28 weeks) or until all frozen embryos were used, whichever occurred first. Pipelle endometrial biopsies from 34 female patients were obtained on Days 7-8 after oocyte retrieval or spontaneous ovulation in natural cycles, respectively, and HOXA10, MEIS1 and LIF mRNA and protein expression levels in the human endometrium was determined by quantitative real-time PCR and western blot, respectively. MAIN RESULTS AND THE ROLE OF CHANCE: There were no significant differences in CLBRs between the GnRH antagonist, depot GnRHa or long GnRHa protocol (71.4 versus 75.5 versus 72.2%, respectively). However, there was a significantly higher LBR per fresh ET cycle in the depot GnRHa protocol than in the long GnRHa and GnRH antagonist protocols (62.6 versus 52.1% versus 45.6%, P < 0.05). Furthermore, HOXA10, MEIS1 and LIF mRNA and protein expression in endometrium all showed significantly higher in the depot GnRHa protocol than in the long GnRHa and GnRH antagonist protocols (P < 0.05). LIMITATIONS, REASONS FOR CAUTION: A limitation of our study was that both our clinicians and patients were not blinded to the randomization for the randomized controlled trial (RCT). An inclusion criterion for the current retrospective cohort study was based on the 'actual ovarian response' during COS treatment, while the included population for the RCT was 'expected normal responders' based on maternal age and ovarian reserve test. In addition, the analysis was restricted to patients under 40 years of age undergoing their first IVF cycle. Furthermore, the endometrial tissue was collected from patients who cancelled the fresh ET, which may include some patients at risk for ovarian hyperstimulation syndrome, however only patients with 4-19 oocytes retrieved were included in the molecular study. WIDER IMPLICATIONS OF THE FINDINGS: The depot GnRH agonist protocol improves the live birth rate per fresh ET cycle, but not the cumulative live birth rate in normal responders. A possible explanation for the improved LBR after fresh ET in the depot GnRHa protocol could be molecular signalling at the level of endometrial receptivity. STUDY FUNDING/COMPETING INTEREST(S): This project was funded by Grant 81571439 from the National Natural Sciences Foundation of China and Grant 2016YFC1000206-5 from the National Key Research & Development Program of China. The authors declare no conflict of interest. TRIAL REGISTRATION NUMBER: The RCT trial was registered at the Chinese Clinical Trial Registry, Study Number: ChiCTR-INR-16008220. TRIAL REGISTRATION DATE: 5 April 2016. DATE OF FIRST PATIENT'S ENROLLMENT: 12 May 2016.

La Marca, A. and S. K. Sunkara (2014). "Individualization of controlled ovarian stimulation in IVF using ovarian reserve markers: from theory to practice." Hum Reprod Update 20(1): 124–140.

BACKGROUND: The main objective of individualization of treatment in IVF is to offer every single woman the best treatment tailored to her own unique characteristics, thus maximizing the chances of pregnancy and eliminating the iatrogenic and avoidable risks resulting from ovarian stimulation. Personalization of treatment in IVF should be based on the prediction of ovarian response for every individual. The starting point is to identify if a woman is likely to have a normal, poor or a hyper response and choose the ideal treatment protocol tailored to this prediction. The objective of this review is to summarize the predictive ability of ovarian reserve markers, such as antral follicle count (AFC) and anti-Mullerian hormone (AMH), and the therapeutic strategies that have been proposed in IVF after this prediction. METHODS: A systematic review of the existing literature was performed by searching Medline, EMBASE, Cochrane library and Web of Science for publications in the English language related to AFC, AMH and their incorporation into controlled ovarian stimulation (COS) protocols in IVF. Literature available to May 2013 was included. RESULTS: The search generated 305 citations of which 41 and 25 studies, respectively, reporting the ability of AMH and AFC to predict response to COS were included in this review. The literature review demonstrated that AFC and AMH, the most sensitive markers of ovarian reserve identified to date, are ideal in planning personalized COS protocols. These sensitive markers permit prediction of the whole spectrum of ovarian response with reliable accuracy and clinicians may use either of the two markers as they can be considered interchangeable. Following the categorization of expected ovarian response to stimulation clinicians can adopt tailored therapeutic strategies for each patient. Current scientific trend suggests the elective use of the GnRH antagonist based regimen for hyper-responders, and probably also poor responders, as likely to be beneficial. The selection of the appropriate and individualized gonadotrophin dose is also of paramount importance for effective COS and subsequent IVF outcomes. CONCLUSION: Personalized IVF offers several benefits; it enables clinicians to give women more accurate information on their prognosis thus facilitating counselling especially in cases of extremes of ovarian response. The deployment of therapeutic strategies based on selective use of GnRH analogues and the fine tuning of the gonadotrophin dose on the basis of potential ovarian response in every single woman can allow for a safer and more effective IVF practice.

Toftager, M., et al. (2017). "Cumulative live birth rates after one ART cycle including all subsequent frozen-thaw cycles in 1050 women: secondary outcome of an RCT comparing GnRH-antagonist and GnRH-agonist protocols." Hum Reprod 32(3): 556–567.

STUDY QUESTION: Are cumulative live birth rates (CLBRs) similar in GnRH-antagonist and GnRH-agonist protocols for the first ART cycle including all subsequent frozen-thaw cycles from the same oocyte retrieval? SUMMARY ANSWER: The chances of at least one live birth following utilization of all fresh and frozen embryos after the first ART cycle are similar in GnRH-antagonist and GnRH-agonist protocols. WHAT IS KNOWN ALREADY: Reproductive outcomes of ART treatment are traditionally reported as pregnancies per cycle or per embryo transfer. However, the primary concern is the overall chance of a live birth. After the first ART cycle with fresh embryo transfer, we found live birth rates (LBRs) of 22.8% and 23.8% (P = 0.70) for the GnRH-antagonist and GnRH-agonist protocols, respectively. But with CLBRs including both fresh and frozen embryos from the first oocyte retrieval, chances of at least one live birth increases. There are no previous randomized controlled trials (RCTs) comparing CLBRs in GnRH-antagonist versus GnRH-agonist protocols. Previous studies on CLBR are either retrospective cohort studies including multiple fresh cycles or RCTs comparing single embryo transfer (SET) with double embryo transfer (DET). STUDY DESIGN, SIZE, DURATION: CLBR was a secondary outcome in a Phase IV, dual-center, open-label, RCT including 1050 women allocated to a short GnRH-antagonist or a long GnRH-agonist protocol in a 1:1 ratio over a 5-year period using a web-based concealed randomization code. The minimum follow-up time from the first IVF cycle was 2 years. The aim was to compare CLBR between the two groups following utilization of all fresh and frozen embryos from the first ART cycle. PARTICIPANTS/MATERIALS, SETTING, METHODS: All women referred for their first ART cycle at two public fertility clinics, <40 years of age were approached. A total of 1050 subjects were allocated to treatment and 1023 women started standardized ART protocols with recombinant human follitropin-beta (rFSH) stimulation. Day-2 SET was planned and additional embryos were frozen and used in subsequent frozen-thawed cycles. All pregnancies generated from oocyte retrieval during the first IVF cycle including fresh and frozen-thaw cycles were registered. Ongoing pregnancy was determined by ultrasonography at gestational week 7-9 and live birth was irrespective of the duration of gestation. CLBR was defined as at least one live birth per allocated woman after fresh and frozen cycles. Subjects were censored out after the first live birth. Cox proportional hazard model was used to evaluate the relative prognostic significance of female age, BMI, the number of retrieved oocytes and the diagnosis of infertility in relation to the CLBR. MAIN RESULTS AND THE ROLE OF CHANCE: Baseline characteristics were similar and equal proportions of patients continued with frozen-thaw (frozen embryo transfer, FET) cycles after their fresh ART cycle in the GnRH-antagonist and GnRH-agonist arms. When combining all fresh and frozen-thaw embryo transfers from first oocyte retrieval with a minimum of 2-year follow-up, the CLBR was 34.1% (182/534) in the GnRH-antagonist group versus 31.2% (161/516) in the GnRH-agonist group (odds ratio (OR):1.14; 95% CI: 0.88-1.48, P = 0.32). Mean time to the first live birth was 11.0 months in the GnRH-antagonist group compared to 11.5 months in the GnRH-agonist group (P < 0.01). The total number of deliveries from all FET cycles where embryos were thawed were higher in the antagonist group 64/330 (19.4%) compared to the agonist group 43/355 (12.1%) ((OR): 1.74; 95% CI: 1.14-2.66, P = 0.01). The evaluation of prognostic factors showed that more retrieved oocytes were associated with a significantly higher CLBR in both treatment groups. For the subgroup of obese women (BMI >30 kg/m2), the CLBR was significantly higher in the GnRH-antagonist group (P = 0.02). LIMITATIONS, REASONS FOR CAUTION: The duration of the trial is a possible limitation with introduction of new methods as 'Freeze all' and 'GnRH-agonist triggering', but as these treatments were used in only few women, a systematic bias is not likely. Blastocyst culture of surplus embryos for freezing was introduced to both groups simultaneously, thereby minimizing the risk of bias. Furthermore, with a minimum of 2-year follow-up, a minority (<1%) still had cryopreserved embryos and no live birth at the end of the trial. The post hoc prognostic covariate analyses with multiple strata should be interpreted with caution. Finally, the physicians were not blinded to GnRH treatment group after randomization. WIDER IMPLICATIONS OF THE FINDINGS: With the improvement of embryo culture, freezing and thawing methods as well as a strategy of elective SET, CLBR until first live birth provides an all-inclusive success rate for ART. When comparing GnRH-antagonist and GnRH-agonist protocols, we find similar CLBRs, despite more oocytes being retrieved in the GnRH-agonist protocol. STUDY FUNDING/COMPETING INTERESTS: An unrestricted research grant is funded by Merck Sharp & Dohme Corp., a subsidiary of Merck & Co., Inc., Kenilworth, NJ, USA (MSD). The funders had no influence on the data collection, analyses or conclusions of the study. No conflict of interests to declare. TRIAL REGISTRATION NUMBER: EudraCT #: 2008-005452-24. ClinicalTrial.gov: NCT00756028. TRIAL REGISTRATION DATE: 18 September 2008. DATE OF FIRST PATIENT'S ENROLLMENT: 14 January 2009.

Wei, D., et al. (2025). "Frozen versus fresh embryo transfer in women with low prognosis for in vitro fertilisation treatment: pragmatic, multicentre, randomised controlled trial." BMJ 388: e081474.

OBJECTIVE: To test the hypothesis that a freeze-all strategy would increase the chance of live birth compared with fresh embryo transfer in women with low prognosis for in vitro fertilisation (IVF) treatment. DESIGN: Pragmatic, multicentre, randomised controlled trial. SETTING: Nine academic fertility centres in China. PARTICIPANTS: 838 women with a low prognosis for IVF treatment defined by </=9 oocytes retrieved or poor ovarian reserve (antral follicle count <5 or serum anti-Mullerian hormone level <8.6 pmol/L). INTERVENTIONS: Eligible participants were randomised (1:1) to undergo either frozen embryo transfer or fresh embryo transfer on the day of oocyte retrieval. Participants in the frozen embryo transfer group had all of their embryos cryopreserved and underwent frozen embryo transfer later. Participants in the fresh embryo transfer group underwent fresh embryo transfer after oocyte retrieval. MAIN OUTCOME MEASURES: The primary outcome was live birth, defined as the delivery of neonates with a heartbeat and respiration at >/=28 weeks' gestation. Secondary outcomes were clinical pregnancy, singleton or twin pregnancy, pregnancy loss, ectopic pregnancy, birth weight, maternal and neonatal complications, and cumulative live birth after embryo transfers within one year after randomisation. RESULTS: In an intention-to-treat analysis, the rate of live birth was lower in the frozen embryo transfer group than in the fresh embryo transfer group (32% (132 of 419) v 40% (168 of 419); relative ratio 0.79 (95% confidence interval 0.65 to 0.94); P=0.009). The frozen embryo group had a lower rate of clinical pregnancy than the fresh embryo group (39% (164 of 419) v 47% (197 of 419); 0.83 (0.71 to 0.97)). The cumulative live birth rate was lower in the frozen embryo transfer group compared with the fresh embryo transfer group (44% (185 of 419) v 51% (215 of 419), 0.86 (0.75 to 0.99)). No difference was observed in birth weight, incidence of obstetric complications, or risk of neonatal morbidities. CONCLUSIONS: Fresh embryo transfer may be a better choice for women with low prognosis in terms of live birth rate compared with a freeze-all strategy. The treatment strategies that prevent fresh embryo transfers, such as accumulating embryos with back-to-back cycles or performing routine preimplantation genetic testing for aneuploidy, warrant further studies in women with a low prognosis. TRIAL REGISTRATION: Chinese Clinical Trial Registry ChiCTR2100050168.

Yang, J., et al. (2021). "Cumulative live birth rates between GnRH-agonist long and GnRH-antagonist protocol in one ART cycle when all embryos transferred: real-word data of 18,853 women from China." Reprod Biol Endocrinol 19(1): 124.

BACKGROUND: A consensus has been reached on the preferred primary outcome of all infertility treatment trials, which is the cumulative live birth rate (CLBR). Some recent randomized controlled trials (RCTs) and retrospective studies have compared the effectiveness of GnRH-antagonist and GnRH-agonist protocols but showed inconsistent results. Studies commonly used conservative estimates and optimal estimates to described the CLBR of one incomplete assisted reproductive technology (ART) cycle and there are not many previous studies with data of the complete cycle to compare CLBRs in GnRH-antagonist versus GnRH-agonist protocols. METHODS: A total of 18,853 patients have completed their first IVF cycle including fresh and subsequent frozen-thawed cycles during 2016-2019, 16,827 patients were treated with GnRH-a long and 2026 patients with GnRH-ant protocol. Multivariable logistic analysis was used to evaluate the difference of GnRH-a and GnRH-ant protocol in relation to CLBR. Utilized Propensity Score Matching(PSM) for sampling by up to 1:1 nearest neighbor matching to adjust the numerical difference and balance the confounders between groups. RESULTS: Before PSM, significant differences were observed in baseline characteristics and the CLBR was 50.91% in the GnRH-a and 33.42% in the GnRH-ant (OR = 2.07; 95%CI: 1.88-2.28; P < 0.001). Stratified analysis showed the CLBR of GnRH-ant was lower than GnRH-a in suboptimal responders(46.89 vs 27.42%, OR = 2.34, 95%CI = 1.99-2.74; P < 0.001) and no differences of CLBR were observed in other patients between protocols. After adjusting for potential confounders, multivariable logistic analysis found the CLBR of GnRH-ant group was lower than that of GnRH-a group (OR = 2.11, 95%CI:1.69-2.63, P < 0.001). After PSM balenced the confounders between groups, the CLBR of GnRH-a group was higher than that of GnRH-ant group in suboptimal responders((38.61 vs 28.22%, OR = 1.60, 95%CI = 1.28-1.99; P < 0.001) and the normal fertilization rate and number of available embryo in GnRH-a were higher than these of GnRH-ant groups in suboptimal responders (77.39 vs 75.22%; 2.86 +/- 1.26 vs 2.61 +/- 1.22; P < 0.05). No significant difference was observed in other patients between different protocols. CONCLUSIONS: It is crucial to optimize the utilization of protocols in different ovarian response patients and reconsider the field of application of GnRH-ant protocols in China.

Stimulation, E. G. G. o. O., B. Ata, E. Bosch, S. Broer, G. Griesinger, M. Grynberg, E. Kolibianakis, M. Kunicki, A. La Marca, G. Lainas, N. Le Clef, N. Massin, N. P. Polyzos, S. K. Sunkara, T. Timeva, M. Toyli, J. Urbancsek and F. Broekmans (2026). "ESHRE guideline: ovarian stimulation for IVF/ICSI: an update in 2025dagger." Hum Reprod.

Melo, P., A. Eapen, Y. Chung, Y. Jeve, M. J. Price, S. K. Sunkara, N. S. Macklon, Y. Khalaf, A. Tobias, F. J. Broekmans, M. K. Khairy, I. D. Gallos and A. Coomarasamy (2025). "Controlled ovarian stimulation protocols for assisted reproduction: a network meta-analysis." Cochrane Database Syst Rev 7(7): CD012586.

Lobo, R., S. Santos-Ribeiro, A. Falahati, K. Moley, A. Pinborg, N. S. Macklon and I. E. Jepsen (2025). "One-year cumulative live birth rate associated with the number of oocytes in ovarian stimulation with follitropin delta: a pooled analysis of four randomized controlled trials." Hum Reprod 40(8): 1526–1534.

Kuan, K. K. W., S. Omoseni and J. A. Tello (2023). "Comparing ART outcomes in women with endometriosis after GnRH agonist versus GnRH antagonist ovarian stimulation: a systematic review." Ther Adv Endocrinol Metab 14: 20420188231173325.

Ren, J., A. Sha, D. Han, P. Li, J. Geng and C. Ma (2014). "Does prolonged pituitary down-regulation with gonadotropin-releasing hormone agonist improve the live-birth rate in in vitro fertilization treatment?" Fertil Steril 102(1): 75–81.

Tian, L. F., J. Tan, Y. Zou, Q. Su, Y. Li, D. F. Xu and Q. F. Wu (2019). "Mild starting dosage ovarian stimulation combined with a modified prolonged GnRH-a protocol improved IVF/ICSI outcomes in normal ovarian responders." Arch Med Sci 15(5): 1294–1300.

Xu, B., D. Geerts, S. Hu, J. Yue, Z. Li, G. Zhu and L. Jin (2020). "The depot GnRH agonist protocol improves the live birth rate per fresh embryo transfer cycle, but not the cumulative live birth rate in normal responders: a randomized controlled trial and molecular mechanism study." Hum Reprod 35(6): 1306–1318.

La Marca, A. and S. K. Sunkara (2014). "Individualization of controlled ovarian stimulation in IVF using ovarian reserve markers: from theory to practice." Hum Reprod Update 20(1): 124–140.

Toftager, M., J. Bogstad, K. Lossl, L. Praetorius, A. Zedeler, T. Bryndorf, L. Nilas and A. Pinborg (2017). "Cumulative live birth rates after one ART cycle including all subsequent frozen-thaw cycles in 1050 women: secondary outcome of an RCT comparing GnRH-antagonist and GnRH-agonist protocols." Hum Reprod 32(3): 556–567.

Wei, D., Y. Sun, H. Zhao, J. Yan, H. Zhou, F. Gong, A. Zhang, Z. Wang, L. Jin, H. Bao, S. Zhao, Z. Xiao, Y. Qin, L. Geng, L. Cui, Y. Sheng, M. Sun, P. Liu, L. Ding, H. Liu, K. Wu, Y. Li, Y. Lu, B. Xu, B. Xu, L. Zhang, H. Zhang, R. S. Legro and Z. J. Chen (2025). "Frozen versus fresh embryo transfer in women with low prognosis for in vitro fertilisation treatment: pragmatic, multicentre, randomised controlled trial." BMJ 388: e081474.

Yang, J., X. Zhang, X. Ding, Y. Wang, G. Huang and H. Ye (2021). "Cumulative live birth rates between GnRH-agonist long and GnRH-antagonist protocol in one ART cycle when all embryos transferred: real-word data of 18,853 women from China." Reprod Biol Endocrinol 19(1): 124.

Stimulation, E. G. G. o. O., et al. (2026). "ESHRE guideline: ovarian stimulation for IVF/ICSI: an update in 2025dagger." Hum Reprod.

STUDY QUESTION: What is the recommended management of ovarian stimulation, based on the best available evidence in the literature? SUMMARY ANSWER: This updated ESHRE guideline on ovarian stimulation for IVF/ICSI provides 121 recommendations, answering 21 key questions on ovarian stimulation for IVF/ICSI. WHAT IS KNOWN ALREADY? Before the ESHRE guideline on ovarian stimulation for IVF/ICSI was published in 2019, ovarian stimulation for IVF/ICSI had only been discussed briefly in the National Institute for Health and Care Excellence guideline on fertility problems and in a statement by the Royal Australian and New Zealand College of Obstetricians and Gynaecologists. STUDY DESIGN, SIZE, DURATION: The guideline was developed according to the structured methodology for ESHRE guidelines. The 18 key questions from the 2019 version of the guideline were revised by the Guideline Development Group (GDG). This resulted in the addition of one new key question, the splitting of the key question on fertility preservation in three separate key questions (fertility preservation for women facing gonadotoxic treatment, elective oocyte cryopreservation, and oocyte donation) and several new interventions being added to the existing key questions. Papers published between 31 October 2018 and 2 February 2025 and written in English were included. The critical outcomes for this guideline were efficacy in terms of cumulative live birth rate per started cycle or live birth rate per started cycle, as well as safety in terms of the rate of occurrence of moderate and/or severe ovarian hyperstimulation syndrome (OHSS). PARTICIPANTS/MATERIALS, SETTING, METHODS: Based on the available evidence, recommendations were formulated and discussed until consensus was reached within the GDG. Following stakeholder review of the initial draft, the final version was approved by the GDG and ultimately by the ESHRE Executive Committee. MAIN RESULTS AND THE ROLE OF CHANCE: The guideline provides a total of 121 recommendations: 42 recommendations remained unchanged in 2019, 4 recommendations were reworded for better understanding, 29 recommendations were updated in view of new evidence, and 46 new recommendations for 2025 have been formulated. The guideline provides 4 recommendations on pre-stimulation evaluation, 7 recommendations on pre-treatment therapies, 50 recommendations on pituitary suppression and ovarian stimulation, 17 recommendations on monitoring, 18 recommendations on triggering of final oocyte maturation and luteal support, and 8 recommendations on the prevention of OHSS. In addition, the guideline provides 17 recommendations on fertility preservation, both oncologic and elective, and oocyte donation. These include 90 evidence-based recommendations, of which only 42 were formulated as strong recommendations and 48 as conditional, as well as 29 good practice points and 2 research-only recommendations. Of the evidence-based recommendations, none were supported by high-quality evidence, 6 by moderate-quality evidence, 36 by low-quality evidence, and 148 by very low-quality evidence. To support future research on ovarian stimulation for IVF/ICSI, a list of research recommendations was provided. LIMITATIONS, REASONS FOR CAUTION: Several newer interventions are not well studied yet. For most of these interventions, a recommendation against the intervention or a research-only recommendation was formulated based on insufficient evidence. Future studies may require these recommendations to be revised. WIDER IMPLICATIONS OF THE FINDINGS: The guideline provides clinicians with clear advice on best practice in ovarian stimulation, based on the best evidence available. In addition, a list of research recommendations is provided to promote further studies in ovarian stimulation. STUDY FUNDING/COMPETING INTEREST(S): The guideline was developed by ESHRE, who funded the guideline meetings, literature searches, and dissemination of the guideline. The guideline group members did not receive any financial incentives; all work was provided voluntarily. BA reports speaker's fees from Gedeon-Richter, Ferring, IBSA, Intas, Merck, Organon, consulting fees from Merck, Organon, Oxolife, stock options from Global Fertility Solutions LLC (employee co-investment), and was chair of the Turkish Society of Reproductive Medicine. EB reports research grants from Roche Diagnostics and IBSA, consulting fees from MSD, Abbot, Gedeon-Richter, Roche, speaker's fees from IBSA, MSD, Ferring Pharmaceuticals, Abbot, Gedeon-Richter, Merck, Roche, participation in the advisory board of Ferring Pharmaceuticals, IBSA and Merck, and ownership interest from IVI-RMS Valencia. GG was part of the ESHRE working group on Recurrent Implantation Failure and the ESHRE working group on clinical KPISs, reports travel support from Merck, Organon, Ferring, Theramex, Gedeon-Richter, Abbott, consulting fees from Organon, Ferring, Merck, Gedeon-Richter, Theramex, Abbott, ReproNovo, Igyxos, OxoLife, Philipps, ReprodWissen, PregLem, Guerbet, Roche, IBSA, and Besins, speaker's fees from Organon, Ferring, Merck, Gedeon-Richter, Theramex, Abbott, ReproNovo, Igyxos, OxoLife, Philipps, ReprodWissen, PregLem, Guerbet, Roche, IBSA, and Besins, and research grants from Besin, Merck, Abbott, Ferring, Theramex. MG reports speaker's fees from Merck Serono, Ferring, and Gedeon Richter. EK reports travel/hotel expenses from Ferring, Merck SERONO, Vianex, speaker's fees from Ferring, Merck SERONO, Vianex, and is chair of the Greek Society of Fertility and Sterility. MK reports travel support and speaker's fees from Ferring. ALM reports research grants from Merck, Ferring, IBSA, Roche, Organon, Theramex, Beckman Coulter, and Gedeon-Richter, consulting fees from Merck, Ferring, IBSA, Roche, Organon, Theramex, Beckman Coulter, and Gedeon-Richter, speaker's fees from Merck, Ferring, IBSA, Roche, Organon, Theramex, Beckman Coulter, Gedeon-Richter, and participation on an advisory board of Merck, Organon, Ferring, Theramex, Gedeon Richter, and IBSA. GL reports consulting fees from Ferring and Merck, speaker's fees from Ferring, Merck, Gedeon-Richter, Organon, and Vianex, expert testimony fees from Cook, travel support from ESHRE, Ferring, Merck, Gedeon-Richter, Organon, and Vianex, is on the advisory board of Merck and Ferring, and participated in an ESHRE committee and on the Greek Fertility and Sterility Committee. NM reports research grants from IBSA, Organon, consulting fees from Organon, Merck, GE, Ferring, Abbott, and Cooper, and speaker's fees from Ferring, GE, Organon, IBSA, Merck, Theramex. NPP reports research grants from Besins Healthcare, Ferring Pharmaceutical, Merck Serono, Organon, Roche Diagnostics, and Theramex, consulting fees from Besins Healthcare, Alife, Ferring, IBSA, Merck Serono, Organon, Abbott, FertilAI, and speaker's fees from Besins Healthcare, Roche Diagnostics, Ferring Pharmaceuticals, Gedeon-Richter, IBSA, Merck Serono, Organon, and Theramex. SKS reports a research grant from Ferring, travel support from Merck and INTAS, consulting fees from Merck, and speaker's fees from Merck, MSD, INTAS, and Ferring. TT reports travel support from Merck, speaker's fees from Merck, Organon, MSD and is editor-in-chief of a Bulgarian journal, Reproductive Health. MT reports travel support from IBSA, Ferring, and Merck, consulting fees from Abbott and is a member of the board of the Finnish Endocrine Society. JU is a member of the Steering Committee of Richter Reproduction Network and received travel support from IBSA. FB reports a research grant from Besins, is on the advisory board of Merck and Abbott, reports speaker's fees from Ferring, Merck, Besins, Intas Fermaceuticals, PREIS School; he is the owner of FRANKSCHOOL RforL. The other authors have nothing to disclose. TRIAL REGISTRATION NUMBER: N/A. DISCLAIMER: This guideline represents the views of ESHRE, which were achieved after careful consideration of the scientific evidence available at the time of preparation. In the absence of scientific evidence on certain aspects, a consensus between the relevant ESHRE stakeholders has been obtained.Adherence to these clinical practice guidelines does not guarantee a successful or specific outcome, nor does it establish a standard of care. Clinical practice guidelines do not replace the need for application of clinical judgment to each individual presentation, nor variations based on locality and facility type.ESHRE makes no warranty, express or implied, regarding the clinical practice guidelines and specifically excludes any warranties of merchantability and fitness for a particular use or purpose. (The full disclaimer is available at www.eshre.eu/guidelines.).

Melo, P., et al. (2025). "Controlled ovarian stimulation protocols for assisted reproduction: a network meta-analysis." Cochrane Database Syst Rev 7(7): CD012586.

BACKGROUND: Controlled ovarian stimulation (COS) is an essential step in most assisted conception cycles. Different treatment combinations (termed protocols) exist in COS, yet there is no consensus on their relative effectiveness and safety. OBJECTIVES: We aimed to assess the relative effectiveness and safety of COS protocols in clinical practice. SEARCH METHODS: We followed standard Cochrane methodology to conduct extensive electronic searches to 11 June 2024. SELECTION CRITERIA: We included randomised controlled trials (RCTs) comparing at least two COS protocols using any form of pituitary suppression (gonadotrophin-releasing hormone (GnRH) agonists, antagonists or progestogens) and human menopausal gonadotropin (hMG), urinary or recombinant follicle-stimulating hormone (u/rFSH), with or without luteinising hormone (LH) and/or oral medications (e.g. clomifene or letrozole), for ovarian stimulation. The primary outcomes were the rates of live birth or ongoing pregnancy (LBR or OPR) and ovarian hyperstimulation syndrome (OHSS) per participant after one stimulation cycle. The secondary outcomes were the rates of clinical pregnancy, miscarriage, multiple pregnancy, ectopic pregnancy and cycle cancellation per participant, and the number of oocytes, cleavage-stage embryos, blastocyst-stage embryos and cryopreserved embryos per participant. DATA COLLECTION AND ANALYSIS: Two review authors independently selected studies and extracted data. We conducted pairwise and network meta-analyses (NMA) according to participants' predicted response to COS (normal/unselected, high or low). For each outcome and subgroup of women, we grouped treatment protocols into the following different networks: all pituitary suppression methods; all long GnRH agonist protocols; all short GnRH antagonist protocols; all GnRH agonist flare protocols; all protocols using progestogens for pituitary suppression; and all protocols using ovarian stimulation in the absence of pituitary suppression. Using the Cochrane RoB 1 tool, we restricted our primary analyses to RCTs at low risk of 'selection' and 'other' biases. We presented effect estimates as risk ratios (RR) for dichotomous outcomes, or mean difference (MD) for continuous outcomes, with 95% confidence intervals (CI). We used Review Manager and Stata 18 for the meta-analyses. MAIN RESULTS: We included 338 studies investigating a total of 15 pairwise comparisons between different COS protocols in 59,086 women. Of these, 226 trials included only women with predicted normal response or whose predicted response was unstated, 31 trials included only women with predicted high response and 81 trials included only women with predicted low response. Primary outcome (effectiveness) - LBR or OPR per woman randomised Pituitary suppression methods In women with predicted normal response, short antagonist protocols probably result in little to no difference in LBR or OPR versus long agonist protocols (RR 0.95, 95% CI 0.84 to 1.07; 8 studies, 2817 women; I(2) = 0%; moderate-certainty evidence). Network evidence also suggested that ovarian stimulation without pituitary suppression may reduce the LBR or OPR compared with short GnRH antagonist protocols (RR 0.71, 95% CI 0.57 to 0.90; low-certainty evidence) and with GnRH agonist flare protocols (RR 0.52, 95% CI 0.36 to 0.75; low-certainty evidence). Primary outcome (safety) - OHSS per woman randomised Pituitary suppression methods In women with predicted normal response, short GnRH antagonist protocols may reduce OHSS compared with long GnRH agonist protocols (RR 0.88, 95% CI 0.78 to 0.99; 7 studies, 2650 women; I(2) = 0%; low-certainty evidence). Short GnRH antagonist protocols In women with predicted high response receiving short GnRH antagonist protocols, hMG may reduce OHSS compared with rFSH (RR 0.45, 95% CI 0.3 to 0.68; 1 study, 619 women; low-certainty evidence). Secondary outcomes Clinical pregnancy Pituitary suppression methods In women with predicted normal response, network evidence suggested that ovarian stimulation without pituitary suppression lowers the clinical pregnancy rate compared with short GnRH antagonist protocols (RR 0.76, 95% CI 0.61 to 0.93; low-certainty evidence) and with GnRH agonist flare protocols (RR 0.60, 95% CI 0.44 to 0.82; low-certainty evidence). Cancellation Short GnRH antagonist protocols In women with predicted high response undergoing short GnRH antagonist protocols, hMG may increase cancellation compared with rFSH (RR 5.98, 95% CI 1.78 to 20.10; 1 study, 619 women; low-certainty evidence). For the remaining networks and participant subgroups (normal- and low-responding women), the evidence did not confidently identify differences between COS protocols and is not reported in the abstract. Oocyte number Pituitary suppression methods In women with predicted normal response, short GnRH antagonist protocols (MD -0.75, 95% CI -1.49 to -0.02; 17 studies, 4062 women; I(2) = 94%; low-certainty evidence), GnRH agonist flare protocols (MD -3.30, 95% CI -4.87 to -1.73; 1 study, 240 women; I(2) = 96%; low-certainty evidence) and protocols without pituitary suppression (MD -5.80, 95% CI -11.24 to -0.36; 2 studies, 714 women; low-certainty evidence) may lower the oocyte number compared with long GnRH agonist protocols, respectively. In women with predicted low response, short GnRH antagonist protocols may reduce the oocyte number versus long agonist protocols (MD -1.25, 95% CI -2.01 to -0.50; low-certainty evidence). Long GnRH agonist protocols In women with predicted normal response receiving long GnRH agonist protocols, combining rFSH and rLH reduces the oocyte number compared with rFSH alone (MD -0.81, 95% CI -1.33 to -0.28; 6 trials, 1289 women; I(2) = 0%; high-certainty evidence). Remaining evidence For the remaining networks, patient subgroups and secondary outcomes, the evidence did not confidently identify differences between COS protocols. AUTHORS' CONCLUSIONS: Short GnRH antagonist protocols may reduce OHSS rates in women with predicted normal response without compromising LBR or OPR. Ovarian stimulation without pituitary suppression may reduce the LBR or OPR compared with short GnRH antagonist protocols and with GnRH agonist flare protocols. In women with predicted high response receiving short GnRH antagonist protocols, hMG may reduce OHSS compared with rFSH. We were unable to meta-analyse results from 169 trials due to serious risk of selection or other biases, a lack of outcome data, or because of data reported in an unsuitable format for meta-analysis (e.g. per cycle); this led to underpowered analyses for several outcomes and pairwise comparisons. Future trials should focus on evaluating the effect of different COS protocols upon cumulative live birth rates, accounting for all embryo transfers (fresh and/or frozen) after a single stimulation cycle per participant.

Lobo, R., et al. (2025). "One-year cumulative live birth rate associated with the number of oocytes in ovarian stimulation with follitropin delta: a pooled analysis of four randomized controlled trials." Hum Reprod 40(8): 1526–1534.

STUDY QUESTION: What number of oocytes retrieved is associated with the highest cumulative live birth rates (CLBRs) in the fresh and subsequent frozen cycles following ovarian stimulation with follitropin delta? SUMMARY ANSWER: The CLBR increased with the number of oocytes retrieved, plateauing at 21-25 oocytes. WHAT IS KNOWN ALREADY: Live birth rate (LBR) per fresh cycle is the conventionally reported outcome of IVF; however, the marked increase in cryopreserved cycles in recent years suggests that the CLBR has emerged as a more relevant outcome. In the fresh cycle, the number of oocytes retrieved is regarded as a prognostic factor for LBR, and a similar association has been shown for CLBR. STUDY DESIGN, SIZE, DURATION: Pooled analysis including 1746 patients from four randomized controlled trials. Trials were identified from clinical trials available in the Ferring Pharmaceuticals database up to June 2023. Selected trials used follitropin delta for ovarian stimulation and collected outcome data from both fresh and frozen cycles. Follitropin delta dose-response trials, as well as trials investigating follitropin delta in repeated ovarian stimulation cycles, were excluded. Patients included in the analysis underwent ovarian stimulation with follitropin delta and had at least one oocyte retrieved. The outcome of CLBR in the fresh and subsequent frozen cycles was evaluated in relation to the number of oocytes retrieved. CLBR was calculated as the number of patients with at least one live birth divided by the number of all patients included in the analysis. PARTICIPANTS/MATERIALS, SETTING, METHODS: Trial participants were women, 18-42 years of age, who were undergoing their first or second IVF/ICSI cycle in a GnRH antagonist/agonist protocol. Triggering was performed with hCG or GnRH agonist, and insemination was performed by IVF or ICSI. Single or double blastocyst transfer was performed on Day 5 in the fresh cycle, and all viable surplus blastocysts were cryopreserved on Day 5 or Day 6. All pregnancies from the fresh cycle and frozen cycles initiated within 1 year after the start of stimulation were followed until birth. The association between the number of oocytes retrieved and CLBR was assessed using a logistic regression analysis with fractional polynomials to obtain predicted CLBR. Subgroup analyses were performed based on age, anti-Mullerian hormone (AMH), and number of oocytes retrieved. MAIN RESULTS AND THE ROLE OF CHANCE: Overall, 15 trials with follitropin delta were identified in the database. Of those, 11 trials were not eligible, and the remaining 4 trials were included. In total, 1746 patients were included in the analysis. The mean age was 33.8 years (range 21-42 years), and the median AMH level was 17.0 pmol/l (range 0.3-164.2 pmol/l). The vast majority of patients (1645 patients, 94.2%) were treated with a GnRH antagonist protocol, while 101 patients (5.8%) were treated with a GnRH agonist protocol. Overall, 1541 patients (88.3%) received hCG triggering, and 205 patients (11.7%) received GnRH agonist triggering. Frozen cycles (maximum of six) were initiated by 740 patients (42.4%). The study population underwent a total of 2948 cycles: 1746 fresh cycles (referring to ovarian stimulation cycles, with or without transfer) and 1202 frozen cycles (initiated cycles, with or without transfer). The mean number of oocytes retrieved was 12.4 (range 1-72), the fresh cycle LBR was 29.1%, and the CLBR was 51.4%. The CLBR increased with the number of oocytes retrieved up to a plateau starting at 21-25 oocytes. The CLBR reached above 60% at >15 oocytes and above 70% at >20 oocytes. The CLBR decreased with increasing age (57.1%, 51.6%, and 35.8% at <35, 35-37, and >/=38 years), while it was similar for AMH <15 and >/=15 pmol/l (52.0% and 50.9%, respectively). A continued increase in predicted CLBR from 15 oocytes retrieved was observed in older patients (>/=38 years); from 41.3% to 53.4% to 58.7% at 15-19, 20-24, and >/=25 oocytes. No equivalent benefit was observed in younger patients (<38 years), where corresponding rates were 72.5%, 68.0%, and 78.8% in patients <35 years and 70.3%, 73.1%, and 71.5% in patients 35-37 years. The fresh cycle LBR decreased beyond 14 oocytes, while the CLBR continued to increase by the number of oocytes retrieved. LIMITATIONS, REASONS FOR CAUTION: A limited number of patients included in the analysis had >/=20 oocytes retrieved (249 patients, 14.3%). WIDER IMPLICATIONS OF THE FINDINGS: This analysis suggests an increase in CLBR with the number of oocytes retrieved up to a plateau starting at 21-25 oocytes following ovarian stimulation cycles with follitropin delta and subsequent frozen cycles. An increase in CLBR from 20 oocytes was evident in older but not in younger patients. STUDY FUNDING/COMPETING INTEREST(S): The study was funded by Ferring Pharmaceuticals A/S, Copenhagen, Denmark. S.S.-R. has received research funding from Organon/MSD, Theramex, and Gedeon-Richter, consulting fees from Organon/MSD, Ferring Pharmaceuticals, Merck Serono, and IBSA, payment or honoraria from Organon/MSD, Besins and Gedeon-Richter, support for attending meetings from Gedeon-Richter and Besins, is an advisory board member for TTRANSPORT and Deputy of the ESHRE SQART SIG, and owns stocks of IVI Lisboa, Clinica de Reproducao assistida Lda. A.P. has received grants from Cryos, grants and payments from Gedeon Richter, Ferring Pharmaceuticals and Merck A/S, payments from Organon, consulting fees from IBSA, Ferring Pharmaceuticals, Gedeon Richter, Cryos, and Merck A/S, and travel support from Gedeon Richter. N.S.M. has received speaker and consultancy fees from Ferring Pharmaceuticals, IBSA, Merck, Freya, and Gedeon Richter, and is a shareholder in Verso Biosense. K.M. has been a scientific advisor for Calla Lily Clinical Care, Evvy, and AutoIVF. R.L., A.F., K.M., and I.E.J. are employees of Ferring Pharmaceuticals. REGISTRATION NUMBER: N/A.

Kuan, K. K. W., et al. (2023). "Comparing ART outcomes in women with endometriosis after GnRH agonist versus GnRH antagonist ovarian stimulation: a systematic review." Ther Adv Endocrinol Metab 14: 20420188231173325.

BACKGROUND: Endometriosis is an oestrogen-dependent disease that can cause subfertility in women who may require assisted reproductive technology (ART) to achieve their pregnancy goals. OBJECTIVES: The aim of this study was to compare ART outcomes in women with endometriosis following the long GnRH-agonist controlled ovarian stimulation (COS) protocol with those taking the GnRH-antagonist COS protocol. DATA SOURCES AND METHODS: MEDLINE, Embase and Web of Science were systematically searched in June 2022. Randomized controlled trials (RCTs) and observational studies comparing the long GnRH-agonist COS protocol and the GnRH-antagonist COS protocol in women with all stages/subtypes of endometriosis were included. Data were synthesized into comprehensive tables for systematic review. The Scottish Intercollegiate Guidelines Network (SIGN) checklists were used for the risk of bias assessment of non-randomized studies and randomized studies, and all the included studies were deemed to have acceptable quality. MAIN RESULTS: Eight studies (one RCT and seven observational) with 2695 patients (2761 cycles) were included. Most studies generally reported non-significant differences in clinical pregnancy or live birth rates regardless of the COS protocol used. However, the GnRH-agonist protocol may yield a higher total number of oocytes retrieved, especially mature oocytes. Conversely, the GnRH-antagonist protocol required a shorter COS duration and lower gonadotrophin dose. Adverse outcomes, such as rates of cycle cancellation and miscarriage, were similar between both COS protocols. CONCLUSION: Both the long GnRH-agonist and GnRH-antagonist COS protocols generally yield similar pregnancy outcomes. However, the long GnRH-agonist protocol may be associated with a higher cumulative pregnancy rate due to the higher number of retrieved oocytes available for cryopreservation. The underlying mechanisms of the two COS protocols on the female reproductive tract remain unclear. Clinicians should consider treatment costs, stage/subtype of endometriosis and pregnancy goals of their patients when selecting a GnRH analogue for COS. A well-powered RCT is needed to minimize the risk of bias and compare the risk for ovarian hyperstimulation syndrome. REGISTRATION: This review was prospectively registered at PROSPERO under Registration No. CRD42022327604.

Ren, J., et al. (2014). "Does prolonged pituitary down-regulation with gonadotropin-releasing hormone agonist improve the live-birth rate in in vitro fertilization treatment?" Fertil Steril 102(1): 75–81.

OBJECTIVE: To evaluate the effects of a prolonged duration of gonadotropin-releasing hormone agonist (GnRH-a) in pituitary down-regulation for controlled ovarian hyperstimulation (COH) on the live-birth rate in nonendometriotic women undergoing in vitro fertilization and embryo transfer (IVF-ET). DESIGN: Retrospective cohort study. SETTING: University-affiliated hospital. PATIENT(S): Normogonadotropic women undergoing IVF. INTERVENTION(S): Three hundred seventy-eight patients receiving a prolonged pituitary down-regulation with GnRH-a before ovarian stimulation and 422 patients receiving a GnRH-a long protocol. MAIN OUTCOME MEASURE(S): Live-birth rate per fresh ET. RESULT(S): In comparison with the long protocol, the prolonged down-regulation protocol required a higher total dose of gonadotropins. A lower serum luteinizing hormone (LH) level on the starting day of gonadotropin and the day of human chorionic gonadotropin (hCG) and a fewer number of oocytes and embryos were observed in the prolonged down-regulation protocol. However, the duration of stimulation and number of high-quality embryos were comparable between the two groups. A statistically significantly higher implantation rate (50.27% vs. 39.69%), clinical pregnancy rate (64.02% vs. 56.87%) and live-birth rate per fresh transfer cycle (55.56% vs. 45.73%) were observed in the prolonged protocol. CONCLUSION(S): Prolonged down-regulation in a GnRH-a protocol might increase the live-birth rates in normogonadotropic women.

Song, J., et al. (2020). "Comparison of GnRH-a Prolonged Protocol and Short GnRH-a Long Protocol in Patients with Thin Endometrium for Assisted Reproduction: A Retrospective Cohort Study." Drug Des Devel Ther 14: 3673–3682.

PURPOSE: Gonadotrophin releasing hormone agonist (GnRH-a) is widely used for pituitary down-regulation and recruiting more follicles in assisted reproduction. However, no information is available on its value for patients with thin endometrial thickness. PATIENTS AND METHODS: This was a retrospective cohort study of 302 patients with endometrium <8 mm undergoing fresh embryo transfer at a fertility center of a university hospital from January 2016 and December 2018. In 148 cycles of the GnRH-a prolonged protocol, one depot of 3.75 mg GnRH-a was injected on day 2 of the menstrual cycle, while in 154 cycles of the short GnRH-a long protocol, 0.1 mg of GnRH-a was injected daily from the mid-luteal phase. The live birth rate and clinical pregnancy rate were compared between the two groups. Other outcome measures included the implantation rate, miscarriage rate, and characteristics of stimulation procedures. RESULTS: Live birth rates and clinical pregnancy rates were significantly higher in the GnRH-a prolonged protocol group than in the other group (36.5% vs 20.8%, P=0.002; 43.9% vs 28.2%, P=0.006, respectively). The live birth rate was significantly increased in the prolonged protocol group (crude OR: 2.190, 95% CI: 1.311, 3.660; adjusted OR: 2.458, 95% CI: 1.430, 4.224) compared with that in the reference group. The implantation rate of the former group was also significantly higher than that of the latter group (35.4% vs 15.9%, P=0.000). There was no significant difference in miscarriage rates between the two protocols. In terms of stimulation procedures, the GnRH-a prolonged protocol group required significantly higher Gn time (10.9 vs 9.5 days, P=0.000) and Gn consumption (2625.0 vs 2047.5 IU, P=0.000) than the short GnRH-a long protocol group. CONCLUSION: The GnRH-a prolonged protocol in fresh embryo transfer cycles yielded better clinical outcomes of patients with thin endometrium than the short GnRH-a long protocol.

Tian, L. F., et al. (2019). "Mild starting dosage ovarian stimulation combined with a modified prolonged GnRH-a protocol improved IVF/ICSI outcomes in normal ovarian responders." Arch Med Sci 15(5): 1294–1300.

INTRODUCTION: Controlled ovarian hyperstimulation (COH) is essential for artificial reproduction technology (ART). This study aimed to evaluate the effects of a mild starting dosage of r-FSH ovarian stimulation after the modified prolonged GnRH-a down-regulation protocol for COH on the clinical outcomes in normal ovarian responders undergoing in vitro fertilization/intracytoplasmic sperm injection-embryo transfer (IVF/ICSI-ET). MATERIAL AND METHODS: In the retrospective study, the patients were separated into two groups according to the starting dosage of r-FSH: a mild dosage group (75 IU </= r-FSH < 150 IU, n = 858) and a conventional dosage group (150 IU </= r-FSH </= 225 IU, n = 535). Data were collected from clinical records. The baseline characteristics and clinical outcomes were compared between the two groups. RESULTS: Although the duration of r-FSH treatment was a little longer in the mild dosage group, the total r-FSH dosage and the cost of ovarian stimulation were significantly lower than those in the conventional dosage group. Furthermore, compared to the conventional dosage group, the number of retrieved oocytes was also lower in the mild dosage group, whereas the rates of two pronuclei (2PN) fertilized oocytes and good-quality embryos were remarkable higher. The implantation rate, clinical pregnancy rate and live birth rate were significantly higher in the mild dosage group. There was no difference in early miscarriages rate, incidence of moderate and severe ovarian hyper-stimulation syndrome (OHSS) or incidence of ectopic pregnancy between the two groups. CONCLUSIONS: The modified prolonged GnRH-a pituitary down-regulation regimen combined with mild r-FSH starting dosage improved IVF/ICSI outcomes and reduced the financial cost in normal ovarian responders.

La Marca, A. and S. K. Sunkara (2014). "Individualization of controlled ovarian stimulation in IVF using ovarian reserve markers: from theory to practice." Hum Reprod Update 20(1): 124–140.

BACKGROUND: The main objective of individualization of treatment in IVF is to offer every single woman the best treatment tailored to her own unique characteristics, thus maximizing the chances of pregnancy and eliminating the iatrogenic and avoidable risks resulting from ovarian stimulation. Personalization of treatment in IVF should be based on the prediction of ovarian response for every individual. The starting point is to identify if a woman is likely to have a normal, poor or a hyper response and choose the ideal treatment protocol tailored to this prediction. The objective of this review is to summarize the predictive ability of ovarian reserve markers, such as antral follicle count (AFC) and anti-Mullerian hormone (AMH), and the therapeutic strategies that have been proposed in IVF after this prediction. METHODS: A systematic review of the existing literature was performed by searching Medline, EMBASE, Cochrane library and Web of Science for publications in the English language related to AFC, AMH and their incorporation into controlled ovarian stimulation (COS) protocols in IVF. Literature available to May 2013 was included. RESULTS: The search generated 305 citations of which 41 and 25 studies, respectively, reporting the ability of AMH and AFC to predict response to COS were included in this review. The literature review demonstrated that AFC and AMH, the most sensitive markers of ovarian reserve identified to date, are ideal in planning personalized COS protocols. These sensitive markers permit prediction of the whole spectrum of ovarian response with reliable accuracy and clinicians may use either of the two markers as they can be considered interchangeable. Following the categorization of expected ovarian response to stimulation clinicians can adopt tailored therapeutic strategies for each patient. Current scientific trend suggests the elective use of the GnRH antagonist based regimen for hyper-responders, and probably also poor responders, as likely to be beneficial. The selection of the appropriate and individualized gonadotrophin dose is also of paramount importance for effective COS and subsequent IVF outcomes. CONCLUSION: Personalized IVF offers several benefits; it enables clinicians to give women more accurate information on their prognosis thus facilitating counselling especially in cases of extremes of ovarian response. The deployment of therapeutic strategies based on selective use of GnRH analogues and the fine tuning of the gonadotrophin dose on the basis of potential ovarian response in every single woman can allow for a safer and more effective IVF practice.

Xu, B., et al. (2020). "The depot GnRH agonist protocol improves the live birth rate per fresh embryo transfer cycle, but not the cumulative live birth rate in normal responders: a randomized controlled trial and molecular mechanism study." Hum Reprod 35(6): 1306–1318.

STUDY QUESTION: Do cumulative live birth rates (CLBRs) after one complete ART cycle differ between the three commonly used controlled ovarian stimulation (COS) protocols (GnRH antagonist, depot GnRHa (GnRH agonist) and long GnRHa) in normal responders undergoing IVF/ICSI? SUMMARY ANSWER: There were similar CLBRs between the GnRH antagonist, depot GnRHa and long GnRHa protocols. WHAT IS KNOWN ALREADY: There is no consensus on which COS protocol is the most optimal in women with normal ovarian response. The CLBR provides the final success rate after one complete ART cycle, including the fresh and all subsequent frozen-thawed embryo transfer (ET) cycles. We suggest that the CLBR measure would allow for better comparisons between the different treatment protocols. STUDY DESIGN, SIZE, DURATION: A prospective controlled, randomized, open label trial was performed between May 2016 and May 2017. A total of 819 patients were allocated to the GnRH antagonist, depot GnRHa or long GnRHa protocol in a 1:1:1 ratio. The minimum follow-up time from the first IVF cycle was 2 years. To further investigate the potential effect of COS with the GnRH antagonist, depot GnRHa or long GnRHa protocol on endometrial receptivity, the expression of homeobox A10 (HOXA10), myeloid ecotropic viral integration site 1 (MEIS1) and leukemia inhibitory factor (LIF) endometrial receptivity markers was evaluated in endometrial tissue from patients treated with the different COS protocols. PARTICIPANTS/MATERIALS, SETTING, METHODS: Infertile women with normal ovarian response (n = 819) undergoing IVF/ICSI treatment were randomized to the GnRH antagonist, depot GnRHa or long GnRHa protocol. Both IVF and ICSI cycles were included, and the sperm samples used were either fresh or frozen partner ejaculates or frozen donor ejaculates. The primary outcome was the live birth rate (LBR) per fresh ET cycle, and the CLBR after one complete ART cycle, until the birth of a first child (after 28 weeks) or until all frozen embryos were used, whichever occurred first. Pipelle endometrial biopsies from 34 female patients were obtained on Days 7-8 after oocyte retrieval or spontaneous ovulation in natural cycles, respectively, and HOXA10, MEIS1 and LIF mRNA and protein expression levels in the human endometrium was determined by quantitative real-time PCR and western blot, respectively. MAIN RESULTS AND THE ROLE OF CHANCE: There were no significant differences in CLBRs between the GnRH antagonist, depot GnRHa or long GnRHa protocol (71.4 versus 75.5 versus 72.2%, respectively). However, there was a significantly higher LBR per fresh ET cycle in the depot GnRHa protocol than in the long GnRHa and GnRH antagonist protocols (62.6 versus 52.1% versus 45.6%, P < 0.05). Furthermore, HOXA10, MEIS1 and LIF mRNA and protein expression in endometrium all showed significantly higher in the depot GnRHa protocol than in the long GnRHa and GnRH antagonist protocols (P < 0.05). LIMITATIONS, REASONS FOR CAUTION: A limitation of our study was that both our clinicians and patients were not blinded to the randomization for the randomized controlled trial (RCT). An inclusion criterion for the current retrospective cohort study was based on the 'actual ovarian response' during COS treatment, while the included population for the RCT was 'expected normal responders' based on maternal age and ovarian reserve test. In addition, the analysis was restricted to patients under 40 years of age undergoing their first IVF cycle. Furthermore, the endometrial tissue was collected from patients who cancelled the fresh ET, which may include some patients at risk for ovarian hyperstimulation syndrome, however only patients with 4-19 oocytes retrieved were included in the molecular study. WIDER IMPLICATIONS OF THE FINDINGS: The depot GnRH agonist protocol improves the live birth rate per fresh ET cycle, but not the cumulative live birth rate in normal responders. A possible explanation for the improved LBR after fresh ET in the depot GnRHa protocol could be molecular signalling at the level of endometrial receptivity. STUDY FUNDING/COMPETING INTEREST(S): This project was funded by Grant 81571439 from the National Natural Sciences Foundation of China and Grant 2016YFC1000206-5 from the National Key Research & Development Program of China. The authors declare no conflict of interest. TRIAL REGISTRATION NUMBER: The RCT trial was registered at the Chinese Clinical Trial Registry, Study Number: ChiCTR-INR-16008220. TRIAL REGISTRATION DATE: 5 April 2016. DATE OF FIRST PATIENT'S ENROLLMENT: 12 May 2016.

Toftager, M., et al. (2017). "Cumulative live birth rates after one ART cycle including all subsequent frozen-thaw cycles in 1050 women: secondary outcome of an RCT comparing GnRH-antagonist and GnRH-agonist protocols." Hum Reprod 32(3): 556–567.

STUDY QUESTION: Are cumulative live birth rates (CLBRs) similar in GnRH-antagonist and GnRH-agonist protocols for the first ART cycle including all subsequent frozen-thaw cycles from the same oocyte retrieval? SUMMARY ANSWER: The chances of at least one live birth following utilization of all fresh and frozen embryos after the first ART cycle are similar in GnRH-antagonist and GnRH-agonist protocols. WHAT IS KNOWN ALREADY: Reproductive outcomes of ART treatment are traditionally reported as pregnancies per cycle or per embryo transfer. However, the primary concern is the overall chance of a live birth. After the first ART cycle with fresh embryo transfer, we found live birth rates (LBRs) of 22.8% and 23.8% (P = 0.70) for the GnRH-antagonist and GnRH-agonist protocols, respectively. But with CLBRs including both fresh and frozen embryos from the first oocyte retrieval, chances of at least one live birth increases. There are no previous randomized controlled trials (RCTs) comparing CLBRs in GnRH-antagonist versus GnRH-agonist protocols. Previous studies on CLBR are either retrospective cohort studies including multiple fresh cycles or RCTs comparing single embryo transfer (SET) with double embryo transfer (DET). STUDY DESIGN, SIZE, DURATION: CLBR was a secondary outcome in a Phase IV, dual-center, open-label, RCT including 1050 women allocated to a short GnRH-antagonist or a long GnRH-agonist protocol in a 1:1 ratio over a 5-year period using a web-based concealed randomization code. The minimum follow-up time from the first IVF cycle was 2 years. The aim was to compare CLBR between the two groups following utilization of all fresh and frozen embryos from the first ART cycle. PARTICIPANTS/MATERIALS, SETTING, METHODS: All women referred for their first ART cycle at two public fertility clinics, <40 years of age were approached. A total of 1050 subjects were allocated to treatment and 1023 women started standardized ART protocols with recombinant human follitropin-beta (rFSH) stimulation. Day-2 SET was planned and additional embryos were frozen and used in subsequent frozen-thawed cycles. All pregnancies generated from oocyte retrieval during the first IVF cycle including fresh and frozen-thaw cycles were registered. Ongoing pregnancy was determined by ultrasonography at gestational week 7-9 and live birth was irrespective of the duration of gestation. CLBR was defined as at least one live birth per allocated woman after fresh and frozen cycles. Subjects were censored out after the first live birth. Cox proportional hazard model was used to evaluate the relative prognostic significance of female age, BMI, the number of retrieved oocytes and the diagnosis of infertility in relation to the CLBR. MAIN RESULTS AND THE ROLE OF CHANCE: Baseline characteristics were similar and equal proportions of patients continued with frozen-thaw (frozen embryo transfer, FET) cycles after their fresh ART cycle in the GnRH-antagonist and GnRH-agonist arms. When combining all fresh and frozen-thaw embryo transfers from first oocyte retrieval with a minimum of 2-year follow-up, the CLBR was 34.1% (182/534) in the GnRH-antagonist group versus 31.2% (161/516) in the GnRH-agonist group (odds ratio (OR):1.14; 95% CI: 0.88-1.48, P = 0.32). Mean time to the first live birth was 11.0 months in the GnRH-antagonist group compared to 11.5 months in the GnRH-agonist group (P < 0.01). The total number of deliveries from all FET cycles where embryos were thawed were higher in the antagonist group 64/330 (19.4%) compared to the agonist group 43/355 (12.1%) ((OR): 1.74; 95% CI: 1.14-2.66, P = 0.01). The evaluation of prognostic factors showed that more retrieved oocytes were associated with a significantly higher CLBR in both treatment groups. For the subgroup of obese women (BMI >30 kg/m2), the CLBR was significantly higher in the GnRH-antagonist group (P = 0.02). LIMITATIONS, REASONS FOR CAUTION: The duration of the trial is a possible limitation with introduction of new methods as 'Freeze all' and 'GnRH-agonist triggering', but as these treatments were used in only few women, a systematic bias is not likely. Blastocyst culture of surplus embryos for freezing was introduced to both groups simultaneously, thereby minimizing the risk of bias. Furthermore, with a minimum of 2-year follow-up, a minority (<1%) still had cryopreserved embryos and no live birth at the end of the trial. The post hoc prognostic covariate analyses with multiple strata should be interpreted with caution. Finally, the physicians were not blinded to GnRH treatment group after randomization. WIDER IMPLICATIONS OF THE FINDINGS: With the improvement of embryo culture, freezing and thawing methods as well as a strategy of elective SET, CLBR until first live birth provides an all-inclusive success rate for ART. When comparing GnRH-antagonist and GnRH-agonist protocols, we find similar CLBRs, despite more oocytes being retrieved in the GnRH-agonist protocol. STUDY FUNDING/COMPETING INTERESTS: An unrestricted research grant is funded by Merck Sharp & Dohme Corp., a subsidiary of Merck & Co., Inc., Kenilworth, NJ, USA (MSD). The funders had no influence on the data collection, analyses or conclusions of the study. No conflict of interests to declare. TRIAL REGISTRATION NUMBER: EudraCT #: 2008-005452-24. ClinicalTrial.gov: NCT00756028. TRIAL REGISTRATION DATE: 18 September 2008. DATE OF FIRST PATIENT'S ENROLLMENT: 14 January 2009.

Wei, D., et al. (2025). "Frozen versus fresh embryo transfer in women with low prognosis for in vitro fertilisation treatment: pragmatic, multicentre, randomised controlled trial." BMJ 388: e081474.

OBJECTIVE: To test the hypothesis that a freeze-all strategy would increase the chance of live birth compared with fresh embryo transfer in women with low prognosis for in vitro fertilisation (IVF) treatment. DESIGN: Pragmatic, multicentre, randomised controlled trial. SETTING: Nine academic fertility centres in China. PARTICIPANTS: 838 women with a low prognosis for IVF treatment defined by </=9 oocytes retrieved or poor ovarian reserve (antral follicle count <5 or serum anti-Mullerian hormone level <8.6 pmol/L). INTERVENTIONS: Eligible participants were randomised (1:1) to undergo either frozen embryo transfer or fresh embryo transfer on the day of oocyte retrieval. Participants in the frozen embryo transfer group had all of their embryos cryopreserved and underwent frozen embryo transfer later. Participants in the fresh embryo transfer group underwent fresh embryo transfer after oocyte retrieval. MAIN OUTCOME MEASURES: The primary outcome was live birth, defined as the delivery of neonates with a heartbeat and respiration at >/=28 weeks' gestation. Secondary outcomes were clinical pregnancy, singleton or twin pregnancy, pregnancy loss, ectopic pregnancy, birth weight, maternal and neonatal complications, and cumulative live birth after embryo transfers within one year after randomisation. RESULTS: In an intention-to-treat analysis, the rate of live birth was lower in the frozen embryo transfer group than in the fresh embryo transfer group (32% (132 of 419) v 40% (168 of 419); relative ratio 0.79 (95% confidence interval 0.65 to 0.94); P=0.009). The frozen embryo group had a lower rate of clinical pregnancy than the fresh embryo group (39% (164 of 419) v 47% (197 of 419); 0.83 (0.71 to 0.97)). The cumulative live birth rate was lower in the frozen embryo transfer group compared with the fresh embryo transfer group (44% (185 of 419) v 51% (215 of 419), 0.86 (0.75 to 0.99)). No difference was observed in birth weight, incidence of obstetric complications, or risk of neonatal morbidities. CONCLUSIONS: Fresh embryo transfer may be a better choice for women with low prognosis in terms of live birth rate compared with a freeze-all strategy. The treatment strategies that prevent fresh embryo transfers, such as accumulating embryos with back-to-back cycles or performing routine preimplantation genetic testing for aneuploidy, warrant further studies in women with a low prognosis. TRIAL REGISTRATION: Chinese Clinical Trial Registry ChiCTR2100050168.

Yang, J., et al. (2021). "Cumulative live birth rates between GnRH-agonist long and GnRH-antagonist protocol in one ART cycle when all embryos transferred: real-word data of 18,853 women from China." Reprod Biol Endocrinol 19(1): 124.

BACKGROUND: A consensus has been reached on the preferred primary outcome of all infertility treatment trials, which is the cumulative live birth rate (CLBR). Some recent randomized controlled trials (RCTs) and retrospective studies have compared the effectiveness of GnRH-antagonist and GnRH-agonist protocols but showed inconsistent results. Studies commonly used conservative estimates and optimal estimates to described the CLBR of one incomplete assisted reproductive technology (ART) cycle and there are not many previous studies with data of the complete cycle to compare CLBRs in GnRH-antagonist versus GnRH-agonist protocols. METHODS: A total of 18,853 patients have completed their first IVF cycle including fresh and subsequent frozen-thawed cycles during 2016-2019, 16,827 patients were treated with GnRH-a long and 2026 patients with GnRH-ant protocol. Multivariable logistic analysis was used to evaluate the difference of GnRH-a and GnRH-ant protocol in relation to CLBR. Utilized Propensity Score Matching(PSM) for sampling by up to 1:1 nearest neighbor matching to adjust the numerical difference and balance the confounders between groups. RESULTS: Before PSM, significant differences were observed in baseline characteristics and the CLBR was 50.91% in the GnRH-a and 33.42% in the GnRH-ant (OR = 2.07; 95%CI: 1.88-2.28; P < 0.001). Stratified analysis showed the CLBR of GnRH-ant was lower than GnRH-a in suboptimal responders(46.89 vs 27.42%, OR = 2.34, 95%CI = 1.99-2.74; P < 0.001) and no differences of CLBR were observed in other patients between protocols. After adjusting for potential confounders, multivariable logistic analysis found the CLBR of GnRH-ant group was lower than that of GnRH-a group (OR = 2.11, 95%CI:1.69-2.63, P < 0.001). After PSM balenced the confounders between groups, the CLBR of GnRH-a group was higher than that of GnRH-ant group in suboptimal responders((38.61 vs 28.22%, OR = 1.60, 95%CI = 1.28-1.99; P < 0.001) and the normal fertilization rate and number of available embryo in GnRH-a were higher than these of GnRH-ant groups in suboptimal responders (77.39 vs 75.22%; 2.86 +/- 1.26 vs 2.61 +/- 1.22; P < 0.05). No significant difference was observed in other patients between different protocols. CONCLUSIONS: It is crucial to optimize the utilization of protocols in different ovarian response patients and reconsider the field of application of GnRH-ant protocols in China.

1. Stimulation, E.G.G.o.O., et al., ESHRE guideline: ovarian stimulation for IVF/ICSI: an update in 2025dagger. Hum Reprod, 2026.

2. Melo, P., et al., Controlled ovarian stimulation protocols for assisted reproduction: a network meta-analysis. Cochrane Database Syst Rev, 2025. 7(7): p. CD012586.

3. Lobo, R., et al., One-year cumulative live birth rate associated with the number of oocytes in ovarian stimulation with follitropin delta: a pooled analysis of four randomized controlled trials. Hum Reprod, 2025. 40(8): p. 1526–1534.

6. Ren, J., et al., Does prolonged pituitary down-regulation with gonadotropin-releasing hormone agonist improve the live-birth rate in in vitro fertilization treatment? Fertil Steril, 2014. 102(1): p. 75–81.

7. Song, J., et al., Comparison of GnRH-a Prolonged Protocol and Short GnRH-a Long Protocol in Patients with Thin Endometrium for Assisted Reproduction: A Retrospective Cohort Study. Drug Des Devel Ther, 2020. 14: p. 3673–3682.

8. Tian, L.F., et al., Mild starting dosage ovarian stimulation combined with a modified prolonged GnRH-a protocol improved IVF/ICSI outcomes in normal ovarian responders. Arch Med Sci, 2019. 15(5): p. 1294–1300.

9. Xu, B., et al., The depot GnRH agonist protocol improves the live birth rate per fresh embryo transfer cycle, but not the cumulative live birth rate in normal responders: a randomized controlled trial and molecular mechanism study. Hum Reprod, 2020. 35(6): p. 1306–1318.

10. La Marca, A. and S.K. Sunkara, Individualization of controlled ovarian stimulation in IVF using ovarian reserve markers: from theory to practice. Hum Reprod Update, 2014. 20(1): p. 124–40.

11. Toftager, M., et al., Cumulative live birth rates after one ART cycle including all subsequent frozen-thaw cycles in 1050 women: secondary outcome of an RCT comparing GnRH-antagonist and GnRH-agonist protocols. Hum Reprod, 2017. 32(3): p. 556–567.

12. Wei, D., et al., Frozen versus fresh embryo transfer in women with low prognosis for in vitro fertilisation treatment: pragmatic, multicentre, randomised controlled trial. BMJ, 2025. 388: p. e081474.

13. Yang, J., et al., Cumulative live birth rates between GnRH-agonist long and GnRH-antagonist protocol in one ART cycle when all embryos transferred: real-word data of 18,853 women from China. Reprod Biol Endocrinol, 2021. 19(1): p. 124.

Stimulation, E. G. G. o. O., et al. (2026). "ESHRE guideline: ovarian stimulation for IVF/ICSI: an update in 2025dagger." Hum Reprod.

STUDY QUESTION: What is the recommended management of ovarian stimulation, based on the best available evidence in the literature? SUMMARY ANSWER: This updated ESHRE guideline on ovarian stimulation for IVF/ICSI provides 121 recommendations, answering 21 key questions on ovarian stimulation for IVF/ICSI. WHAT IS KNOWN ALREADY? Before the ESHRE guideline on ovarian stimulation for IVF/ICSI was published in 2019, ovarian stimulation for IVF/ICSI had only been discussed briefly in the National Institute for Health and Care Excellence guideline on fertility problems and in a statement by the Royal Australian and New Zealand College of Obstetricians and Gynaecologists. STUDY DESIGN, SIZE, DURATION: The guideline was developed according to the structured methodology for ESHRE guidelines. The 18 key questions from the 2019 version of the guideline were revised by the Guideline Development Group (GDG). This resulted in the addition of one new key question, the splitting of the key question on fertility preservation in three separate key questions (fertility preservation for women facing gonadotoxic treatment, elective oocyte cryopreservation, and oocyte donation) and several new interventions being added to the existing key questions. Papers published between 31 October 2018 and 2 February 2025 and written in English were included. The critical outcomes for this guideline were efficacy in terms of cumulative live birth rate per started cycle or live birth rate per started cycle, as well as safety in terms of the rate of occurrence of moderate and/or severe ovarian hyperstimulation syndrome (OHSS). PARTICIPANTS/MATERIALS, SETTING, METHODS: Based on the available evidence, recommendations were formulated and discussed until consensus was reached within the GDG. Following stakeholder review of the initial draft, the final version was approved by the GDG and ultimately by the ESHRE Executive Committee. MAIN RESULTS AND THE ROLE OF CHANCE: The guideline provides a total of 121 recommendations: 42 recommendations remained unchanged in 2019, 4 recommendations were reworded for better understanding, 29 recommendations were updated in view of new evidence, and 46 new recommendations for 2025 have been formulated. The guideline provides 4 recommendations on pre-stimulation evaluation, 7 recommendations on pre-treatment therapies, 50 recommendations on pituitary suppression and ovarian stimulation, 17 recommendations on monitoring, 18 recommendations on triggering of final oocyte maturation and luteal support, and 8 recommendations on the prevention of OHSS. In addition, the guideline provides 17 recommendations on fertility preservation, both oncologic and elective, and oocyte donation. These include 90 evidence-based recommendations, of which only 42 were formulated as strong recommendations and 48 as conditional, as well as 29 good practice points and 2 research-only recommendations. Of the evidence-based recommendations, none were supported by high-quality evidence, 6 by moderate-quality evidence, 36 by low-quality evidence, and 148 by very low-quality evidence. To support future research on ovarian stimulation for IVF/ICSI, a list of research recommendations was provided. LIMITATIONS, REASONS FOR CAUTION: Several newer interventions are not well studied yet. For most of these interventions, a recommendation against the intervention or a research-only recommendation was formulated based on insufficient evidence. Future studies may require these recommendations to be revised. WIDER IMPLICATIONS OF THE FINDINGS: The guideline provides clinicians with clear advice on best practice in ovarian stimulation, based on the best evidence available. In addition, a list of research recommendations is provided to promote further studies in ovarian stimulation. STUDY FUNDING/COMPETING INTEREST(S): The guideline was developed by ESHRE, who funded the guideline meetings, literature searches, and dissemination of the guideline. The guideline group members did not receive any financial incentives; all work was provided voluntarily. BA reports speaker's fees from Gedeon-Richter, Ferring, IBSA, Intas, Merck, Organon, consulting fees from Merck, Organon, Oxolife, stock options from Global Fertility Solutions LLC (employee co-investment), and was chair of the Turkish Society of Reproductive Medicine. EB reports research grants from Roche Diagnostics and IBSA, consulting fees from MSD, Abbot, Gedeon-Richter, Roche, speaker's fees from IBSA, MSD, Ferring Pharmaceuticals, Abbot, Gedeon-Richter, Merck, Roche, participation in the advisory board of Ferring Pharmaceuticals, IBSA and Merck, and ownership interest from IVI-RMS Valencia. GG was part of the ESHRE working group on Recurrent Implantation Failure and the ESHRE working group on clinical KPISs, reports travel support from Merck, Organon, Ferring, Theramex, Gedeon-Richter, Abbott, consulting fees from Organon, Ferring, Merck, Gedeon-Richter, Theramex, Abbott, ReproNovo, Igyxos, OxoLife, Philipps, ReprodWissen, PregLem, Guerbet, Roche, IBSA, and Besins, speaker's fees from Organon, Ferring, Merck, Gedeon-Richter, Theramex, Abbott, ReproNovo, Igyxos, OxoLife, Philipps, ReprodWissen, PregLem, Guerbet, Roche, IBSA, and Besins, and research grants from Besin, Merck, Abbott, Ferring, Theramex. MG reports speaker's fees from Merck Serono, Ferring, and Gedeon Richter. EK reports travel/hotel expenses from Ferring, Merck SERONO, Vianex, speaker's fees from Ferring, Merck SERONO, Vianex, and is chair of the Greek Society of Fertility and Sterility. MK reports travel support and speaker's fees from Ferring. ALM reports research grants from Merck, Ferring, IBSA, Roche, Organon, Theramex, Beckman Coulter, and Gedeon-Richter, consulting fees from Merck, Ferring, IBSA, Roche, Organon, Theramex, Beckman Coulter, and Gedeon-Richter, speaker's fees from Merck, Ferring, IBSA, Roche, Organon, Theramex, Beckman Coulter, Gedeon-Richter, and participation on an advisory board of Merck, Organon, Ferring, Theramex, Gedeon Richter, and IBSA. GL reports consulting fees from Ferring and Merck, speaker's fees from Ferring, Merck, Gedeon-Richter, Organon, and Vianex, expert testimony fees from Cook, travel support from ESHRE, Ferring, Merck, Gedeon-Richter, Organon, and Vianex, is on the advisory board of Merck and Ferring, and participated in an ESHRE committee and on the Greek Fertility and Sterility Committee. NM reports research grants from IBSA, Organon, consulting fees from Organon, Merck, GE, Ferring, Abbott, and Cooper, and speaker's fees from Ferring, GE, Organon, IBSA, Merck, Theramex. NPP reports research grants from Besins Healthcare, Ferring Pharmaceutical, Merck Serono, Organon, Roche Diagnostics, and Theramex, consulting fees from Besins Healthcare, Alife, Ferring, IBSA, Merck Serono, Organon, Abbott, FertilAI, and speaker's fees from Besins Healthcare, Roche Diagnostics, Ferring Pharmaceuticals, Gedeon-Richter, IBSA, Merck Serono, Organon, and Theramex. SKS reports a research grant from Ferring, travel support from Merck and INTAS, consulting fees from Merck, and speaker's fees from Merck, MSD, INTAS, and Ferring. TT reports travel support from Merck, speaker's fees from Merck, Organon, MSD and is editor-in-chief of a Bulgarian journal, Reproductive Health. MT reports travel support from IBSA, Ferring, and Merck, consulting fees from Abbott and is a member of the board of the Finnish Endocrine Society. JU is a member of the Steering Committee of Richter Reproduction Network and received travel support from IBSA. FB reports a research grant from Besins, is on the advisory board of Merck and Abbott, reports speaker's fees from Ferring, Merck, Besins, Intas Fermaceuticals, PREIS School; he is the owner of FRANKSCHOOL RforL. The other authors have nothing to disclose. TRIAL REGISTRATION NUMBER: N/A. DISCLAIMER: This guideline represents the views of ESHRE, which were achieved after careful consideration of the scientific evidence available at the time of preparation. In the absence of scientific evidence on certain aspects, a consensus between the relevant ESHRE stakeholders has been obtained.Adherence to these clinical practice guidelines does not guarantee a successful or specific outcome, nor does it establish a standard of care. Clinical practice guidelines do not replace the need for application of clinical judgment to each individual presentation, nor variations based on locality and facility type.ESHRE makes no warranty, express or implied, regarding the clinical practice guidelines and specifically excludes any warranties of merchantability and fitness for a particular use or purpose. (The full disclaimer is available at www.eshre.eu/guidelines.).

Melo, P., et al. (2025). "Controlled ovarian stimulation protocols for assisted reproduction: a network meta-analysis." Cochrane Database Syst Rev 7(7): CD012586.

BACKGROUND: Controlled ovarian stimulation (COS) is an essential step in most assisted conception cycles. Different treatment combinations (termed protocols) exist in COS, yet there is no consensus on their relative effectiveness and safety. OBJECTIVES: We aimed to assess the relative effectiveness and safety of COS protocols in clinical practice. SEARCH METHODS: We followed standard Cochrane methodology to conduct extensive electronic searches to 11 June 2024. SELECTION CRITERIA: We included randomised controlled trials (RCTs) comparing at least two COS protocols using any form of pituitary suppression (gonadotrophin-releasing hormone (GnRH) agonists, antagonists or progestogens) and human menopausal gonadotropin (hMG), urinary or recombinant follicle-stimulating hormone (u/rFSH), with or without luteinising hormone (LH) and/or oral medications (e.g. clomifene or letrozole), for ovarian stimulation. The primary outcomes were the rates of live birth or ongoing pregnancy (LBR or OPR) and ovarian hyperstimulation syndrome (OHSS) per participant after one stimulation cycle. The secondary outcomes were the rates of clinical pregnancy, miscarriage, multiple pregnancy, ectopic pregnancy and cycle cancellation per participant, and the number of oocytes, cleavage-stage embryos, blastocyst-stage embryos and cryopreserved embryos per participant. DATA COLLECTION AND ANALYSIS: Two review authors independently selected studies and extracted data. We conducted pairwise and network meta-analyses (NMA) according to participants' predicted response to COS (normal/unselected, high or low). For each outcome and subgroup of women, we grouped treatment protocols into the following different networks: all pituitary suppression methods; all long GnRH agonist protocols; all short GnRH antagonist protocols; all GnRH agonist flare protocols; all protocols using progestogens for pituitary suppression; and all protocols using ovarian stimulation in the absence of pituitary suppression. Using the Cochrane RoB 1 tool, we restricted our primary analyses to RCTs at low risk of 'selection' and 'other' biases. We presented effect estimates as risk ratios (RR) for dichotomous outcomes, or mean difference (MD) for continuous outcomes, with 95% confidence intervals (CI). We used Review Manager and Stata 18 for the meta-analyses. MAIN RESULTS: We included 338 studies investigating a total of 15 pairwise comparisons between different COS protocols in 59,086 women. Of these, 226 trials included only women with predicted normal response or whose predicted response was unstated, 31 trials included only women with predicted high response and 81 trials included only women with predicted low response. Primary outcome (effectiveness) - LBR or OPR per woman randomised Pituitary suppression methods In women with predicted normal response, short antagonist protocols probably result in little to no difference in LBR or OPR versus long agonist protocols (RR 0.95, 95% CI 0.84 to 1.07; 8 studies, 2817 women; I(2) = 0%; moderate-certainty evidence). Network evidence also suggested that ovarian stimulation without pituitary suppression may reduce the LBR or OPR compared with short GnRH antagonist protocols (RR 0.71, 95% CI 0.57 to 0.90; low-certainty evidence) and with GnRH agonist flare protocols (RR 0.52, 95% CI 0.36 to 0.75; low-certainty evidence). Primary outcome (safety) - OHSS per woman randomised Pituitary suppression methods In women with predicted normal response, short GnRH antagonist protocols may reduce OHSS compared with long GnRH agonist protocols (RR 0.88, 95% CI 0.78 to 0.99; 7 studies, 2650 women; I(2) = 0%; low-certainty evidence). Short GnRH antagonist protocols In women with predicted high response receiving short GnRH antagonist protocols, hMG may reduce OHSS compared with rFSH (RR 0.45, 95% CI 0.3 to 0.68; 1 study, 619 women; low-certainty evidence). Secondary outcomes Clinical pregnancy Pituitary suppression methods In women with predicted normal response, network evidence suggested that ovarian stimulation without pituitary suppression lowers the clinical pregnancy rate compared with short GnRH antagonist protocols (RR 0.76, 95% CI 0.61 to 0.93; low-certainty evidence) and with GnRH agonist flare protocols (RR 0.60, 95% CI 0.44 to 0.82; low-certainty evidence). Cancellation Short GnRH antagonist protocols In women with predicted high response undergoing short GnRH antagonist protocols, hMG may increase cancellation compared with rFSH (RR 5.98, 95% CI 1.78 to 20.10; 1 study, 619 women; low-certainty evidence). For the remaining networks and participant subgroups (normal- and low-responding women), the evidence did not confidently identify differences between COS protocols and is not reported in the abstract. Oocyte number Pituitary suppression methods In women with predicted normal response, short GnRH antagonist protocols (MD -0.75, 95% CI -1.49 to -0.02; 17 studies, 4062 women; I(2) = 94%; low-certainty evidence), GnRH agonist flare protocols (MD -3.30, 95% CI -4.87 to -1.73; 1 study, 240 women; I(2) = 96%; low-certainty evidence) and protocols without pituitary suppression (MD -5.80, 95% CI -11.24 to -0.36; 2 studies, 714 women; low-certainty evidence) may lower the oocyte number compared with long GnRH agonist protocols, respectively. In women with predicted low response, short GnRH antagonist protocols may reduce the oocyte number versus long agonist protocols (MD -1.25, 95% CI -2.01 to -0.50; low-certainty evidence). Long GnRH agonist protocols In women with predicted normal response receiving long GnRH agonist protocols, combining rFSH and rLH reduces the oocyte number compared with rFSH alone (MD -0.81, 95% CI -1.33 to -0.28; 6 trials, 1289 women; I(2) = 0%; high-certainty evidence). Remaining evidence For the remaining networks, patient subgroups and secondary outcomes, the evidence did not confidently identify differences between COS protocols. AUTHORS' CONCLUSIONS: Short GnRH antagonist protocols may reduce OHSS rates in women with predicted normal response without compromising LBR or OPR. Ovarian stimulation without pituitary suppression may reduce the LBR or OPR compared with short GnRH antagonist protocols and with GnRH agonist flare protocols. In women with predicted high response receiving short GnRH antagonist protocols, hMG may reduce OHSS compared with rFSH. We were unable to meta-analyse results from 169 trials due to serious risk of selection or other biases, a lack of outcome data, or because of data reported in an unsuitable format for meta-analysis (e.g. per cycle); this led to underpowered analyses for several outcomes and pairwise comparisons. Future trials should focus on evaluating the effect of different COS protocols upon cumulative live birth rates, accounting for all embryo transfers (fresh and/or frozen) after a single stimulation cycle per participant.

Lobo, R., et al. (2025). "One-year cumulative live birth rate associated with the number of oocytes in ovarian stimulation with follitropin delta: a pooled analysis of four randomized controlled trials." Hum Reprod 40(8): 1526–1534.

STUDY QUESTION: What number of oocytes retrieved is associated with the highest cumulative live birth rates (CLBRs) in the fresh and subsequent frozen cycles following ovarian stimulation with follitropin delta? SUMMARY ANSWER: The CLBR increased with the number of oocytes retrieved, plateauing at 21-25 oocytes. WHAT IS KNOWN ALREADY: Live birth rate (LBR) per fresh cycle is the conventionally reported outcome of IVF; however, the marked increase in cryopreserved cycles in recent years suggests that the CLBR has emerged as a more relevant outcome. In the fresh cycle, the number of oocytes retrieved is regarded as a prognostic factor for LBR, and a similar association has been shown for CLBR. STUDY DESIGN, SIZE, DURATION: Pooled analysis including 1746 patients from four randomized controlled trials. Trials were identified from clinical trials available in the Ferring Pharmaceuticals database up to June 2023. Selected trials used follitropin delta for ovarian stimulation and collected outcome data from both fresh and frozen cycles. Follitropin delta dose-response trials, as well as trials investigating follitropin delta in repeated ovarian stimulation cycles, were excluded. Patients included in the analysis underwent ovarian stimulation with follitropin delta and had at least one oocyte retrieved. The outcome of CLBR in the fresh and subsequent frozen cycles was evaluated in relation to the number of oocytes retrieved. CLBR was calculated as the number of patients with at least one live birth divided by the number of all patients included in the analysis. PARTICIPANTS/MATERIALS, SETTING, METHODS: Trial participants were women, 18-42 years of age, who were undergoing their first or second IVF/ICSI cycle in a GnRH antagonist/agonist protocol. Triggering was performed with hCG or GnRH agonist, and insemination was performed by IVF or ICSI. Single or double blastocyst transfer was performed on Day 5 in the fresh cycle, and all viable surplus blastocysts were cryopreserved on Day 5 or Day 6. All pregnancies from the fresh cycle and frozen cycles initiated within 1 year after the start of stimulation were followed until birth. The association between the number of oocytes retrieved and CLBR was assessed using a logistic regression analysis with fractional polynomials to obtain predicted CLBR. Subgroup analyses were performed based on age, anti-Mullerian hormone (AMH), and number of oocytes retrieved. MAIN RESULTS AND THE ROLE OF CHANCE: Overall, 15 trials with follitropin delta were identified in the database. Of those, 11 trials were not eligible, and the remaining 4 trials were included. In total, 1746 patients were included in the analysis. The mean age was 33.8 years (range 21-42 years), and the median AMH level was 17.0 pmol/l (range 0.3-164.2 pmol/l). The vast majority of patients (1645 patients, 94.2%) were treated with a GnRH antagonist protocol, while 101 patients (5.8%) were treated with a GnRH agonist protocol. Overall, 1541 patients (88.3%) received hCG triggering, and 205 patients (11.7%) received GnRH agonist triggering. Frozen cycles (maximum of six) were initiated by 740 patients (42.4%). The study population underwent a total of 2948 cycles: 1746 fresh cycles (referring to ovarian stimulation cycles, with or without transfer) and 1202 frozen cycles (initiated cycles, with or without transfer). The mean number of oocytes retrieved was 12.4 (range 1-72), the fresh cycle LBR was 29.1%, and the CLBR was 51.4%. The CLBR increased with the number of oocytes retrieved up to a plateau starting at 21-25 oocytes. The CLBR reached above 60% at >15 oocytes and above 70% at >20 oocytes. The CLBR decreased with increasing age (57.1%, 51.6%, and 35.8% at <35, 35-37, and >/=38 years), while it was similar for AMH <15 and >/=15 pmol/l (52.0% and 50.9%, respectively). A continued increase in predicted CLBR from 15 oocytes retrieved was observed in older patients (>/=38 years); from 41.3% to 53.4% to 58.7% at 15-19, 20-24, and >/=25 oocytes. No equivalent benefit was observed in younger patients (<38 years), where corresponding rates were 72.5%, 68.0%, and 78.8% in patients <35 years and 70.3%, 73.1%, and 71.5% in patients 35-37 years. The fresh cycle LBR decreased beyond 14 oocytes, while the CLBR continued to increase by the number of oocytes retrieved. LIMITATIONS, REASONS FOR CAUTION: A limited number of patients included in the analysis had >/=20 oocytes retrieved (249 patients, 14.3%). WIDER IMPLICATIONS OF THE FINDINGS: This analysis suggests an increase in CLBR with the number of oocytes retrieved up to a plateau starting at 21-25 oocytes following ovarian stimulation cycles with follitropin delta and subsequent frozen cycles. An increase in CLBR from 20 oocytes was evident in older but not in younger patients. STUDY FUNDING/COMPETING INTEREST(S): The study was funded by Ferring Pharmaceuticals A/S, Copenhagen, Denmark. S.S.-R. has received research funding from Organon/MSD, Theramex, and Gedeon-Richter, consulting fees from Organon/MSD, Ferring Pharmaceuticals, Merck Serono, and IBSA, payment or honoraria from Organon/MSD, Besins and Gedeon-Richter, support for attending meetings from Gedeon-Richter and Besins, is an advisory board member for TTRANSPORT and Deputy of the ESHRE SQART SIG, and owns stocks of IVI Lisboa, Clinica de Reproducao assistida Lda. A.P. has received grants from Cryos, grants and payments from Gedeon Richter, Ferring Pharmaceuticals and Merck A/S, payments from Organon, consulting fees from IBSA, Ferring Pharmaceuticals, Gedeon Richter, Cryos, and Merck A/S, and travel support from Gedeon Richter. N.S.M. has received speaker and consultancy fees from Ferring Pharmaceuticals, IBSA, Merck, Freya, and Gedeon Richter, and is a shareholder in Verso Biosense. K.M. has been a scientific advisor for Calla Lily Clinical Care, Evvy, and AutoIVF. R.L., A.F., K.M., and I.E.J. are employees of Ferring Pharmaceuticals. REGISTRATION NUMBER: N/A.

Ren, J., et al. (2014). "Does prolonged pituitary down-regulation with gonadotropin-releasing hormone agonist improve the live-birth rate in in vitro fertilization treatment?" Fertil Steril 102(1): 75–81.

OBJECTIVE: To evaluate the effects of a prolonged duration of gonadotropin-releasing hormone agonist (GnRH-a) in pituitary down-regulation for controlled ovarian hyperstimulation (COH) on the live-birth rate in nonendometriotic women undergoing in vitro fertilization and embryo transfer (IVF-ET). DESIGN: Retrospective cohort study. SETTING: University-affiliated hospital. PATIENT(S): Normogonadotropic women undergoing IVF. INTERVENTION(S): Three hundred seventy-eight patients receiving a prolonged pituitary down-regulation with GnRH-a before ovarian stimulation and 422 patients receiving a GnRH-a long protocol. MAIN OUTCOME MEASURE(S): Live-birth rate per fresh ET. RESULT(S): In comparison with the long protocol, the prolonged down-regulation protocol required a higher total dose of gonadotropins. A lower serum luteinizing hormone (LH) level on the starting day of gonadotropin and the day of human chorionic gonadotropin (hCG) and a fewer number of oocytes and embryos were observed in the prolonged down-regulation protocol. However, the duration of stimulation and number of high-quality embryos were comparable between the two groups. A statistically significantly higher implantation rate (50.27% vs. 39.69%), clinical pregnancy rate (64.02% vs. 56.87%) and live-birth rate per fresh transfer cycle (55.56% vs. 45.73%) were observed in the prolonged protocol. CONCLUSION(S): Prolonged down-regulation in a GnRH-a protocol might increase the live-birth rates in normogonadotropic women.

Song, J., et al. (2020). "Comparison of GnRH-a Prolonged Protocol and Short GnRH-a Long Protocol in Patients with Thin Endometrium for Assisted Reproduction: A Retrospective Cohort Study." Drug Des Devel Ther 14: 3673–3682.

PURPOSE: Gonadotrophin releasing hormone agonist (GnRH-a) is widely used for pituitary down-regulation and recruiting more follicles in assisted reproduction. However, no information is available on its value for patients with thin endometrial thickness. PATIENTS AND METHODS: This was a retrospective cohort study of 302 patients with endometrium <8 mm undergoing fresh embryo transfer at a fertility center of a university hospital from January 2016 and December 2018. In 148 cycles of the GnRH-a prolonged protocol, one depot of 3.75 mg GnRH-a was injected on day 2 of the menstrual cycle, while in 154 cycles of the short GnRH-a long protocol, 0.1 mg of GnRH-a was injected daily from the mid-luteal phase. The live birth rate and clinical pregnancy rate were compared between the two groups. Other outcome measures included the implantation rate, miscarriage rate, and characteristics of stimulation procedures. RESULTS: Live birth rates and clinical pregnancy rates were significantly higher in the GnRH-a prolonged protocol group than in the other group (36.5% vs 20.8%, P=0.002; 43.9% vs 28.2%, P=0.006, respectively). The live birth rate was significantly increased in the prolonged protocol group (crude OR: 2.190, 95% CI: 1.311, 3.660; adjusted OR: 2.458, 95% CI: 1.430, 4.224) compared with that in the reference group. The implantation rate of the former group was also significantly higher than that of the latter group (35.4% vs 15.9%, P=0.000). There was no significant difference in miscarriage rates between the two protocols. In terms of stimulation procedures, the GnRH-a prolonged protocol group required significantly higher Gn time (10.9 vs 9.5 days, P=0.000) and Gn consumption (2625.0 vs 2047.5 IU, P=0.000) than the short GnRH-a long protocol group. CONCLUSION: The GnRH-a prolonged protocol in fresh embryo transfer cycles yielded better clinical outcomes of patients with thin endometrium than the short GnRH-a long protocol.

Tian, L. F., et al. (2019). "Mild starting dosage ovarian stimulation combined with a modified prolonged GnRH-a protocol improved IVF/ICSI outcomes in normal ovarian responders." Arch Med Sci 15(5): 1294–1300.

INTRODUCTION: Controlled ovarian hyperstimulation (COH) is essential for artificial reproduction technology (ART). This study aimed to evaluate the effects of a mild starting dosage of r-FSH ovarian stimulation after the modified prolonged GnRH-a down-regulation protocol for COH on the clinical outcomes in normal ovarian responders undergoing in vitro fertilization/intracytoplasmic sperm injection-embryo transfer (IVF/ICSI-ET). MATERIAL AND METHODS: In the retrospective study, the patients were separated into two groups according to the starting dosage of r-FSH: a mild dosage group (75 IU </= r-FSH < 150 IU, n = 858) and a conventional dosage group (150 IU </= r-FSH </= 225 IU, n = 535). Data were collected from clinical records. The baseline characteristics and clinical outcomes were compared between the two groups. RESULTS: Although the duration of r-FSH treatment was a little longer in the mild dosage group, the total r-FSH dosage and the cost of ovarian stimulation were significantly lower than those in the conventional dosage group. Furthermore, compared to the conventional dosage group, the number of retrieved oocytes was also lower in the mild dosage group, whereas the rates of two pronuclei (2PN) fertilized oocytes and good-quality embryos were remarkable higher. The implantation rate, clinical pregnancy rate and live birth rate were significantly higher in the mild dosage group. There was no difference in early miscarriages rate, incidence of moderate and severe ovarian hyper-stimulation syndrome (OHSS) or incidence of ectopic pregnancy between the two groups. CONCLUSIONS: The modified prolonged GnRH-a pituitary down-regulation regimen combined with mild r-FSH starting dosage improved IVF/ICSI outcomes and reduced the financial cost in normal ovarian responders.

Xu, B., et al. (2020). "The depot GnRH agonist protocol improves the live birth rate per fresh embryo transfer cycle, but not the cumulative live birth rate in normal responders: a randomized controlled trial and molecular mechanism study." Hum Reprod 35(6): 1306–1318.

STUDY QUESTION: Do cumulative live birth rates (CLBRs) after one complete ART cycle differ between the three commonly used controlled ovarian stimulation (COS) protocols (GnRH antagonist, depot GnRHa (GnRH agonist) and long GnRHa) in normal responders undergoing IVF/ICSI? SUMMARY ANSWER: There were similar CLBRs between the GnRH antagonist, depot GnRHa and long GnRHa protocols. WHAT IS KNOWN ALREADY: There is no consensus on which COS protocol is the most optimal in women with normal ovarian response. The CLBR provides the final success rate after one complete ART cycle, including the fresh and all subsequent frozen-thawed embryo transfer (ET) cycles. We suggest that the CLBR measure would allow for better comparisons between the different treatment protocols. STUDY DESIGN, SIZE, DURATION: A prospective controlled, randomized, open label trial was performed between May 2016 and May 2017. A total of 819 patients were allocated to the GnRH antagonist, depot GnRHa or long GnRHa protocol in a 1:1:1 ratio. The minimum follow-up time from the first IVF cycle was 2 years. To further investigate the potential effect of COS with the GnRH antagonist, depot GnRHa or long GnRHa protocol on endometrial receptivity, the expression of homeobox A10 (HOXA10), myeloid ecotropic viral integration site 1 (MEIS1) and leukemia inhibitory factor (LIF) endometrial receptivity markers was evaluated in endometrial tissue from patients treated with the different COS protocols. PARTICIPANTS/MATERIALS, SETTING, METHODS: Infertile women with normal ovarian response (n = 819) undergoing IVF/ICSI treatment were randomized to the GnRH antagonist, depot GnRHa or long GnRHa protocol. Both IVF and ICSI cycles were included, and the sperm samples used were either fresh or frozen partner ejaculates or frozen donor ejaculates. The primary outcome was the live birth rate (LBR) per fresh ET cycle, and the CLBR after one complete ART cycle, until the birth of a first child (after 28 weeks) or until all frozen embryos were used, whichever occurred first. Pipelle endometrial biopsies from 34 female patients were obtained on Days 7-8 after oocyte retrieval or spontaneous ovulation in natural cycles, respectively, and HOXA10, MEIS1 and LIF mRNA and protein expression levels in the human endometrium was determined by quantitative real-time PCR and western blot, respectively. MAIN RESULTS AND THE ROLE OF CHANCE: There were no significant differences in CLBRs between the GnRH antagonist, depot GnRHa or long GnRHa protocol (71.4 versus 75.5 versus 72.2%, respectively). However, there was a significantly higher LBR per fresh ET cycle in the depot GnRHa protocol than in the long GnRHa and GnRH antagonist protocols (62.6 versus 52.1% versus 45.6%, P < 0.05). Furthermore, HOXA10, MEIS1 and LIF mRNA and protein expression in endometrium all showed significantly higher in the depot GnRHa protocol than in the long GnRHa and GnRH antagonist protocols (P < 0.05). LIMITATIONS, REASONS FOR CAUTION: A limitation of our study was that both our clinicians and patients were not blinded to the randomization for the randomized controlled trial (RCT). An inclusion criterion for the current retrospective cohort study was based on the 'actual ovarian response' during COS treatment, while the included population for the RCT was 'expected normal responders' based on maternal age and ovarian reserve test. In addition, the analysis was restricted to patients under 40 years of age undergoing their first IVF cycle. Furthermore, the endometrial tissue was collected from patients who cancelled the fresh ET, which may include some patients at risk for ovarian hyperstimulation syndrome, however only patients with 4-19 oocytes retrieved were included in the molecular study. WIDER IMPLICATIONS OF THE FINDINGS: The depot GnRH agonist protocol improves the live birth rate per fresh ET cycle, but not the cumulative live birth rate in normal responders. A possible explanation for the improved LBR after fresh ET in the depot GnRHa protocol could be molecular signalling at the level of endometrial receptivity. STUDY FUNDING/COMPETING INTEREST(S): This project was funded by Grant 81571439 from the National Natural Sciences Foundation of China and Grant 2016YFC1000206-5 from the National Key Research & Development Program of China. The authors declare no conflict of interest. TRIAL REGISTRATION NUMBER: The RCT trial was registered at the Chinese Clinical Trial Registry, Study Number: ChiCTR-INR-16008220. TRIAL REGISTRATION DATE: 5 April 2016. DATE OF FIRST PATIENT'S ENROLLMENT: 12 May 2016.

La Marca, A. and S. K. Sunkara (2014). "Individualization of controlled ovarian stimulation in IVF using ovarian reserve markers: from theory to practice." Hum Reprod Update 20(1): 124–140.

BACKGROUND: The main objective of individualization of treatment in IVF is to offer every single woman the best treatment tailored to her own unique characteristics, thus maximizing the chances of pregnancy and eliminating the iatrogenic and avoidable risks resulting from ovarian stimulation. Personalization of treatment in IVF should be based on the prediction of ovarian response for every individual. The starting point is to identify if a woman is likely to have a normal, poor or a hyper response and choose the ideal treatment protocol tailored to this prediction. The objective of this review is to summarize the predictive ability of ovarian reserve markers, such as antral follicle count (AFC) and anti-Mullerian hormone (AMH), and the therapeutic strategies that have been proposed in IVF after this prediction. METHODS: A systematic review of the existing literature was performed by searching Medline, EMBASE, Cochrane library and Web of Science for publications in the English language related to AFC, AMH and their incorporation into controlled ovarian stimulation (COS) protocols in IVF. Literature available to May 2013 was included. RESULTS: The search generated 305 citations of which 41 and 25 studies, respectively, reporting the ability of AMH and AFC to predict response to COS were included in this review. The literature review demonstrated that AFC and AMH, the most sensitive markers of ovarian reserve identified to date, are ideal in planning personalized COS protocols. These sensitive markers permit prediction of the whole spectrum of ovarian response with reliable accuracy and clinicians may use either of the two markers as they can be considered interchangeable. Following the categorization of expected ovarian response to stimulation clinicians can adopt tailored therapeutic strategies for each patient. Current scientific trend suggests the elective use of the GnRH antagonist based regimen for hyper-responders, and probably also poor responders, as likely to be beneficial. The selection of the appropriate and individualized gonadotrophin dose is also of paramount importance for effective COS and subsequent IVF outcomes. CONCLUSION: Personalized IVF offers several benefits; it enables clinicians to give women more accurate information on their prognosis thus facilitating counselling especially in cases of extremes of ovarian response. The deployment of therapeutic strategies based on selective use of GnRH analogues and the fine tuning of the gonadotrophin dose on the basis of potential ovarian response in every single woman can allow for a safer and more effective IVF practice.

Toftager, M., et al. (2017). "Cumulative live birth rates after one ART cycle including all subsequent frozen-thaw cycles in 1050 women: secondary outcome of an RCT comparing GnRH-antagonist and GnRH-agonist protocols." Hum Reprod 32(3): 556–567.

STUDY QUESTION: Are cumulative live birth rates (CLBRs) similar in GnRH-antagonist and GnRH-agonist protocols for the first ART cycle including all subsequent frozen-thaw cycles from the same oocyte retrieval? SUMMARY ANSWER: The chances of at least one live birth following utilization of all fresh and frozen embryos after the first ART cycle are similar in GnRH-antagonist and GnRH-agonist protocols. WHAT IS KNOWN ALREADY: Reproductive outcomes of ART treatment are traditionally reported as pregnancies per cycle or per embryo transfer. However, the primary concern is the overall chance of a live birth. After the first ART cycle with fresh embryo transfer, we found live birth rates (LBRs) of 22.8% and 23.8% (P = 0.70) for the GnRH-antagonist and GnRH-agonist protocols, respectively. But with CLBRs including both fresh and frozen embryos from the first oocyte retrieval, chances of at least one live birth increases. There are no previous randomized controlled trials (RCTs) comparing CLBRs in GnRH-antagonist versus GnRH-agonist protocols. Previous studies on CLBR are either retrospective cohort studies including multiple fresh cycles or RCTs comparing single embryo transfer (SET) with double embryo transfer (DET). STUDY DESIGN, SIZE, DURATION: CLBR was a secondary outcome in a Phase IV, dual-center, open-label, RCT including 1050 women allocated to a short GnRH-antagonist or a long GnRH-agonist protocol in a 1:1 ratio over a 5-year period using a web-based concealed randomization code. The minimum follow-up time from the first IVF cycle was 2 years. The aim was to compare CLBR between the two groups following utilization of all fresh and frozen embryos from the first ART cycle. PARTICIPANTS/MATERIALS, SETTING, METHODS: All women referred for their first ART cycle at two public fertility clinics, <40 years of age were approached. A total of 1050 subjects were allocated to treatment and 1023 women started standardized ART protocols with recombinant human follitropin-beta (rFSH) stimulation. Day-2 SET was planned and additional embryos were frozen and used in subsequent frozen-thawed cycles. All pregnancies generated from oocyte retrieval during the first IVF cycle including fresh and frozen-thaw cycles were registered. Ongoing pregnancy was determined by ultrasonography at gestational week 7-9 and live birth was irrespective of the duration of gestation. CLBR was defined as at least one live birth per allocated woman after fresh and frozen cycles. Subjects were censored out after the first live birth. Cox proportional hazard model was used to evaluate the relative prognostic significance of female age, BMI, the number of retrieved oocytes and the diagnosis of infertility in relation to the CLBR. MAIN RESULTS AND THE ROLE OF CHANCE: Baseline characteristics were similar and equal proportions of patients continued with frozen-thaw (frozen embryo transfer, FET) cycles after their fresh ART cycle in the GnRH-antagonist and GnRH-agonist arms. When combining all fresh and frozen-thaw embryo transfers from first oocyte retrieval with a minimum of 2-year follow-up, the CLBR was 34.1% (182/534) in the GnRH-antagonist group versus 31.2% (161/516) in the GnRH-agonist group (odds ratio (OR):1.14; 95% CI: 0.88-1.48, P = 0.32). Mean time to the first live birth was 11.0 months in the GnRH-antagonist group compared to 11.5 months in the GnRH-agonist group (P < 0.01). The total number of deliveries from all FET cycles where embryos were thawed were higher in the antagonist group 64/330 (19.4%) compared to the agonist group 43/355 (12.1%) ((OR): 1.74; 95% CI: 1.14-2.66, P = 0.01). The evaluation of prognostic factors showed that more retrieved oocytes were associated with a significantly higher CLBR in both treatment groups. For the subgroup of obese women (BMI >30 kg/m2), the CLBR was significantly higher in the GnRH-antagonist group (P = 0.02). LIMITATIONS, REASONS FOR CAUTION: The duration of the trial is a possible limitation with introduction of new methods as 'Freeze all' and 'GnRH-agonist triggering', but as these treatments were used in only few women, a systematic bias is not likely. Blastocyst culture of surplus embryos for freezing was introduced to both groups simultaneously, thereby minimizing the risk of bias. Furthermore, with a minimum of 2-year follow-up, a minority (<1%) still had cryopreserved embryos and no live birth at the end of the trial. The post hoc prognostic covariate analyses with multiple strata should be interpreted with caution. Finally, the physicians were not blinded to GnRH treatment group after randomization. WIDER IMPLICATIONS OF THE FINDINGS: With the improvement of embryo culture, freezing and thawing methods as well as a strategy of elective SET, CLBR until first live birth provides an all-inclusive success rate for ART. When comparing GnRH-antagonist and GnRH-agonist protocols, we find similar CLBRs, despite more oocytes being retrieved in the GnRH-agonist protocol. STUDY FUNDING/COMPETING INTERESTS: An unrestricted research grant is funded by Merck Sharp & Dohme Corp., a subsidiary of Merck & Co., Inc., Kenilworth, NJ, USA (MSD). The funders had no influence on the data collection, analyses or conclusions of the study. No conflict of interests to declare. TRIAL REGISTRATION NUMBER: EudraCT #: 2008-005452-24. ClinicalTrial.gov: NCT00756028. TRIAL REGISTRATION DATE: 18 September 2008. DATE OF FIRST PATIENT'S ENROLLMENT: 14 January 2009.

Wei, D., et al. (2025). "Frozen versus fresh embryo transfer in women with low prognosis for in vitro fertilisation treatment: pragmatic, multicentre, randomised controlled trial." BMJ 388: e081474.

OBJECTIVE: To test the hypothesis that a freeze-all strategy would increase the chance of live birth compared with fresh embryo transfer in women with low prognosis for in vitro fertilisation (IVF) treatment. DESIGN: Pragmatic, multicentre, randomised controlled trial. SETTING: Nine academic fertility centres in China. PARTICIPANTS: 838 women with a low prognosis for IVF treatment defined by </=9 oocytes retrieved or poor ovarian reserve (antral follicle count <5 or serum anti-Mullerian hormone level <8.6 pmol/L). INTERVENTIONS: Eligible participants were randomised (1:1) to undergo either frozen embryo transfer or fresh embryo transfer on the day of oocyte retrieval. Participants in the frozen embryo transfer group had all of their embryos cryopreserved and underwent frozen embryo transfer later. Participants in the fresh embryo transfer group underwent fresh embryo transfer after oocyte retrieval. MAIN OUTCOME MEASURES: The primary outcome was live birth, defined as the delivery of neonates with a heartbeat and respiration at >/=28 weeks' gestation. Secondary outcomes were clinical pregnancy, singleton or twin pregnancy, pregnancy loss, ectopic pregnancy, birth weight, maternal and neonatal complications, and cumulative live birth after embryo transfers within one year after randomisation. RESULTS: In an intention-to-treat analysis, the rate of live birth was lower in the frozen embryo transfer group than in the fresh embryo transfer group (32% (132 of 419) v 40% (168 of 419); relative ratio 0.79 (95% confidence interval 0.65 to 0.94); P=0.009). The frozen embryo group had a lower rate of clinical pregnancy than the fresh embryo group (39% (164 of 419) v 47% (197 of 419); 0.83 (0.71 to 0.97)). The cumulative live birth rate was lower in the frozen embryo transfer group compared with the fresh embryo transfer group (44% (185 of 419) v 51% (215 of 419), 0.86 (0.75 to 0.99)). No difference was observed in birth weight, incidence of obstetric complications, or risk of neonatal morbidities. CONCLUSIONS: Fresh embryo transfer may be a better choice for women with low prognosis in terms of live birth rate compared with a freeze-all strategy. The treatment strategies that prevent fresh embryo transfers, such as accumulating embryos with back-to-back cycles or performing routine preimplantation genetic testing for aneuploidy, warrant further studies in women with a low prognosis. TRIAL REGISTRATION: Chinese Clinical Trial Registry ChiCTR2100050168.

Yang, J., et al. (2021). "Cumulative live birth rates between GnRH-agonist long and GnRH-antagonist protocol in one ART cycle when all embryos transferred: real-word data of 18,853 women from China." Reprod Biol Endocrinol 19(1): 124.

BACKGROUND: A consensus has been reached on the preferred primary outcome of all infertility treatment trials, which is the cumulative live birth rate (CLBR). Some recent randomized controlled trials (RCTs) and retrospective studies have compared the effectiveness of GnRH-antagonist and GnRH-agonist protocols but showed inconsistent results. Studies commonly used conservative estimates and optimal estimates to described the CLBR of one incomplete assisted reproductive technology (ART) cycle and there are not many previous studies with data of the complete cycle to compare CLBRs in GnRH-antagonist versus GnRH-agonist protocols. METHODS: A total of 18,853 patients have completed their first IVF cycle including fresh and subsequent frozen-thawed cycles during 2016-2019, 16,827 patients were treated with GnRH-a long and 2026 patients with GnRH-ant protocol. Multivariable logistic analysis was used to evaluate the difference of GnRH-a and GnRH-ant protocol in relation to CLBR. Utilized Propensity Score Matching(PSM) for sampling by up to 1:1 nearest neighbor matching to adjust the numerical difference and balance the confounders between groups. RESULTS: Before PSM, significant differences were observed in baseline characteristics and the CLBR was 50.91% in the GnRH-a and 33.42% in the GnRH-ant (OR = 2.07; 95%CI: 1.88-2.28; P < 0.001). Stratified analysis showed the CLBR of GnRH-ant was lower than GnRH-a in suboptimal responders(46.89 vs 27.42%, OR = 2.34, 95%CI = 1.99-2.74; P < 0.001) and no differences of CLBR were observed in other patients between protocols. After adjusting for potential confounders, multivariable logistic analysis found the CLBR of GnRH-ant group was lower than that of GnRH-a group (OR = 2.11, 95%CI:1.69-2.63, P < 0.001). After PSM balenced the confounders between groups, the CLBR of GnRH-a group was higher than that of GnRH-ant group in suboptimal responders((38.61 vs 28.22%, OR = 1.60, 95%CI = 1.28-1.99; P < 0.001) and the normal fertilization rate and number of available embryo in GnRH-a were higher than these of GnRH-ant groups in suboptimal responders (77.39 vs 75.22%; 2.86 +/- 1.26 vs 2.61 +/- 1.22; P < 0.05). No significant difference was observed in other patients between different protocols. CONCLUSIONS: It is crucial to optimize the utilization of protocols in different ovarian response patients and reconsider the field of application of GnRH-ant protocols in China.

Stimulation, E. G. G. o. O., B. Ata, E. Bosch, S. Broer, G. Griesinger, M. Grynberg, E. Kolibianakis, M. Kunicki, A. La Marca, G. Lainas, N. Le Clef, N. Massin, N. P. Polyzos, S. K. Sunkara, T. Timeva, M. Toyli, J. Urbancsek and F. Broekmans (2026). "ESHRE guideline: ovarian stimulation for IVF/ICSI: an update in 2025dagger." Hum Reprod.

Melo, P., A. Eapen, Y. Chung, Y. Jeve, M. J. Price, S. K. Sunkara, N. S. Macklon, Y. Khalaf, A. Tobias, F. J. Broekmans, M. K. Khairy, I. D. Gallos and A. Coomarasamy (2025). "Controlled ovarian stimulation protocols for assisted reproduction: a network meta-analysis." Cochrane Database Syst Rev 7(7): CD012586.

Lobo, R., S. Santos-Ribeiro, A. Falahati, K. Moley, A. Pinborg, N. S. Macklon and I. E. Jepsen (2025). "One-year cumulative live birth rate associated with the number of oocytes in ovarian stimulation with follitropin delta: a pooled analysis of four randomized controlled trials." Hum Reprod 40(8): 1526–1534.

Kuan, K. K. W., S. Omoseni and J. A. Tello (2023). "Comparing ART outcomes in women with endometriosis after GnRH agonist versus GnRH antagonist ovarian stimulation: a systematic review." Ther Adv Endocrinol Metab 14: 20420188231173325.

Ren, J., A. Sha, D. Han, P. Li, J. Geng and C. Ma (2014). "Does prolonged pituitary down-regulation with gonadotropin-releasing hormone agonist improve the live-birth rate in in vitro fertilization treatment?" Fertil Steril 102(1): 75–81.

Song, J., C. Duan, W. Cai, W. Wu, H. Lv and J. Xu (2020). "Comparison of GnRH-a Prolonged Protocol and Short GnRH-a Long Protocol in Patients with Thin Endometrium for Assisted Reproduction: A Retrospective Cohort Study." Drug Des Devel Ther 14: 3673–3682.

Tian, L. F., J. Tan, Y. Zou, Q. Su, Y. Li, D. F. Xu and Q. F. Wu (2019). "Mild starting dosage ovarian stimulation combined with a modified prolonged GnRH-a protocol improved IVF/ICSI outcomes in normal ovarian responders." Arch Med Sci 15(5): 1294–1300.

Xu, B., D. Geerts, S. Hu, J. Yue, Z. Li, G. Zhu and L. Jin (2020). "The depot GnRH agonist protocol improves the live birth rate per fresh embryo transfer cycle, but not the cumulative live birth rate in normal responders: a randomized controlled trial and molecular mechanism study." Hum Reprod 35(6): 1306–1318.

La Marca, A. and S. K. Sunkara (2014). "Individualization of controlled ovarian stimulation in IVF using ovarian reserve markers: from theory to practice." Hum Reprod Update 20(1): 124–140.

Toftager, M., J. Bogstad, K. Lossl, L. Praetorius, A. Zedeler, T. Bryndorf, L. Nilas and A. Pinborg (2017). "Cumulative live birth rates after one ART cycle including all subsequent frozen-thaw cycles in 1050 women: secondary outcome of an RCT comparing GnRH-antagonist and GnRH-agonist protocols." Hum Reprod 32(3): 556–567.

Wei, D., Y. Sun, H. Zhao, J. Yan, H. Zhou, F. Gong, A. Zhang, Z. Wang, L. Jin, H. Bao, S. Zhao, Z. Xiao, Y. Qin, L. Geng, L. Cui, Y. Sheng, M. Sun, P. Liu, L. Ding, H. Liu, K. Wu, Y. Li, Y. Lu, B. Xu, B. Xu, L. Zhang, H. Zhang, R. S. Legro and Z. J. Chen (2025). "Frozen versus fresh embryo transfer in women with low prognosis for in vitro fertilisation treatment: pragmatic, multicentre, randomised controlled trial." BMJ 388: e081474.

Yang, J., X. Zhang, X. Ding, Y. Wang, G. Huang and H. Ye (2021). "Cumulative live birth rates between GnRH-agonist long and GnRH-antagonist protocol in one ART cycle when all embryos transferred: real-word data of 18,853 women from China." Reprod Biol Endocrinol 19(1): 124.

Stimulation, E. G. G. o. O., B. Ata, E. Bosch, S. Broer, G. Griesinger, M. Grynberg, E. Kolibianakis, M. Kunicki, A. La Marca, G. Lainas, N. Le Clef, N. Massin, N. P. Polyzos, S. K. Sunkara, T. Timeva, M. Toyli, J. Urbancsek and F. Broekmans (2026). "ESHRE guideline: ovarian stimulation for IVF/ICSI: an update in 2025dagger." Hum Reprod.

Melo, P., A. Eapen, Y. Chung, Y. Jeve, M. J. Price, S. K. Sunkara, N. S. Macklon, Y. Khalaf, A. Tobias, F. J. Broekmans, M. K. Khairy, I. D. Gallos and A. Coomarasamy (2025). "Controlled ovarian stimulation protocols for assisted reproduction: a network meta-analysis." Cochrane Database Syst Rev 7(7): CD012586.

Lobo, R., S. Santos-Ribeiro, A. Falahati, K. Moley, A. Pinborg, N. S. Macklon and I. E. Jepsen (2025). "One-year cumulative live birth rate associated with the number of oocytes in ovarian stimulation with follitropin delta: a pooled analysis of four randomized controlled trials." Hum Reprod 40(8): 1526–1534.

Kuan, K. K. W., S. Omoseni and J. A. Tello (2023). "Comparing ART outcomes in women with endometriosis after GnRH agonist versus GnRH antagonist ovarian stimulation: a systematic review." Ther Adv Endocrinol Metab 14: 20420188231173325.

Ren, J., A. Sha, D. Han, P. Li, J. Geng and C. Ma (2014). "Does prolonged pituitary down-regulation with gonadotropin-releasing hormone agonist improve the live-birth rate in in vitro fertilization treatment?" Fertil Steril 102(1): 75–81.

Song, J., C. Duan, W. Cai, W. Wu, H. Lv and J. Xu (2020). "Comparison of GnRH-a Prolonged Protocol and Short GnRH-a Long Protocol in Patients with Thin Endometrium for Assisted Reproduction: A Retrospective Cohort Study." Drug Des Devel Ther 14: 3673–3682.

Tian, L. F., J. Tan, Y. Zou, Q. Su, Y. Li, D. F. Xu and Q. F. Wu (2019). "Mild starting dosage ovarian stimulation combined with a modified prolonged GnRH-a protocol improved IVF/ICSI outcomes in normal ovarian responders." Arch Med Sci 15(5): 1294–1300.

Xu, B., D. Geerts, S. Hu, J. Yue, Z. Li, G. Zhu and L. Jin (2020). "The depot GnRH agonist protocol improves the live birth rate per fresh embryo transfer cycle, but not the cumulative live birth rate in normal responders: a randomized controlled trial and molecular mechanism study." Hum Reprod 35(6): 1306–1318.

La Marca, A. and S. K. Sunkara (2014). "Individualization of controlled ovarian stimulation in IVF using ovarian reserve markers: from theory to practice." Hum Reprod Update 20(1): 124–140.

Toftager, M., J. Bogstad, K. Lossl, L. Praetorius, A. Zedeler, T. Bryndorf, L. Nilas and A. Pinborg (2017). "Cumulative live birth rates after one ART cycle including all subsequent frozen-thaw cycles in 1050 women: secondary outcome of an RCT comparing GnRH-antagonist and GnRH-agonist protocols." Hum Reprod 32(3): 556–567.

Wei, D., Y. Sun, H. Zhao, J. Yan, H. Zhou, F. Gong, A. Zhang, Z. Wang, L. Jin, H. Bao, S. Zhao, Z. Xiao, Y. Qin, L. Geng, L. Cui, Y. Sheng, M. Sun, P. Liu, L. Ding, H. Liu, K. Wu, Y. Li, Y. Lu, B. Xu, B. Xu, L. Zhang, H. Zhang, R. S. Legro and Z. J. Chen (2025). "Frozen versus fresh embryo transfer in women with low prognosis for in vitro fertilisation treatment: pragmatic, multicentre, randomised controlled trial." BMJ 388: e081474.

Yang, J., X. Zhang, X. Ding, Y. Wang, G. Huang and H. Ye (2021). "Cumulative live birth rates between GnRH-agonist long and GnRH-antagonist protocol in one ART cycle when all embryos transferred: real-word data of 18,853 women from China." Reprod Biol Endocrinol 19(1): 124.

Stimulation, E. G. G. o. O., B. Ata, E. Bosch, S. Broer, G. Griesinger, M. Grynberg, E. Kolibianakis, M. Kunicki, A. La Marca, G. Lainas, N. Le Clef, N. Massin, N. P. Polyzos, S. K. Sunkara, T. Timeva, M. Toyli, J. Urbancsek and F. Broekmans (2026). "ESHRE guideline: ovarian stimulation for IVF/ICSI: an update in 2025dagger." Hum Reprod.

Melo, P., A. Eapen, Y. Chung, Y. Jeve, M. J. Price, S. K. Sunkara, N. S. Macklon, Y. Khalaf, A. Tobias, F. J. Broekmans, M. K. Khairy, I. D. Gallos and A. Coomarasamy (2025). "Controlled ovarian stimulation protocols for assisted reproduction: a network meta-analysis." Cochrane Database Syst Rev 7(7): CD012586.

Lobo, R., S. Santos-Ribeiro, A. Falahati, K. Moley, A. Pinborg, N. S. Macklon and I. E. Jepsen (2025). "One-year cumulative live birth rate associated with the number of oocytes in ovarian stimulation with follitropin delta: a pooled analysis of four randomized controlled trials." Hum Reprod 40(8): 1526–1534.

Kuan, K. K. W., S. Omoseni and J. A. Tello (2023). "Comparing ART outcomes in women with endometriosis after GnRH agonist versus GnRH antagonist ovarian stimulation: a systematic review." Ther Adv Endocrinol Metab 14: 20420188231173325.

Ren, J., A. Sha, D. Han, P. Li, J. Geng and C. Ma (2014). "Does prolonged pituitary down-regulation with gonadotropin-releasing hormone agonist improve the live-birth rate in in vitro fertilization treatment?" Fertil Steril 102(1): 75–81.

Song, J., C. Duan, W. Cai, W. Wu, H. Lv and J. Xu (2020). "Comparison of GnRH-a Prolonged Protocol and Short GnRH-a Long Protocol in Patients with Thin Endometrium for Assisted Reproduction: A Retrospective Cohort Study." Drug Des Devel Ther 14: 3673–3682.

Tian, L. F., J. Tan, Y. Zou, Q. Su, Y. Li, D. F. Xu and Q. F. Wu (2019). "Mild starting dosage ovarian stimulation combined with a modified prolonged GnRH-a protocol improved IVF/ICSI outcomes in normal ovarian responders." Arch Med Sci 15(5): 1294–1300.

Xu, B., D. Geerts, S. Hu, J. Yue, Z. Li, G. Zhu and L. Jin (2020). "The depot GnRH agonist protocol improves the live birth rate per fresh embryo transfer cycle, but not the cumulative live birth rate in normal responders: a randomized controlled trial and molecular mechanism study." Hum Reprod 35(6): 1306–1318.

La Marca, A. and S. K. Sunkara (2014). "Individualization of controlled ovarian stimulation in IVF using ovarian reserve markers: from theory to practice." Hum Reprod Update 20(1): 124–140.

Toftager, M., J. Bogstad, K. Lossl, L. Praetorius, A. Zedeler, T. Bryndorf, L. Nilas and A. Pinborg (2017). "Cumulative live birth rates after one ART cycle including all subsequent frozen-thaw cycles in 1050 women: secondary outcome of an RCT comparing GnRH-antagonist and GnRH-agonist protocols." Hum Reprod 32(3): 556–567.

Wei, D., Y. Sun, H. Zhao, J. Yan, H. Zhou, F. Gong, A. Zhang, Z. Wang, L. Jin, H. Bao, S. Zhao, Z. Xiao, Y. Qin, L. Geng, L. Cui, Y. Sheng, M. Sun, P. Liu, L. Ding, H. Liu, K. Wu, Y. Li, Y. Lu, B. Xu, B. Xu, L. Zhang, H. Zhang, R. S. Legro and Z. J. Chen (2025). "Frozen versus fresh embryo transfer in women with low prognosis for in vitro fertilisation treatment: pragmatic, multicentre, randomised controlled trial." BMJ 388: e081474.

Yang, J., X. Zhang, X. Ding, Y. Wang, G. Huang and H. Ye (2021). "Cumulative live birth rates between GnRH-agonist long and GnRH-antagonist protocol in one ART cycle when all embryos transferred: real-word data of 18,853 women from China." Reprod Biol Endocrinol 19(1): 124.

Stimulation, E. G. G. o. O., B. Ata, E. Bosch, S. Broer, G. Griesinger, M. Grynberg, E. Kolibianakis, M. Kunicki, A. La Marca, G. Lainas, N. Le Clef, N. Massin, N. P. Polyzos, S. K. Sunkara, T. Timeva, M. Toyli, J. Urbancsek and F. Broekmans (2026). "ESHRE guideline: ovarian stimulation for IVF/ICSI: an update in 2025dagger." Hum Reprod.

Melo, P., A. Eapen, Y. Chung, Y. Jeve, M. J. Price, S. K. Sunkara, N. S. Macklon, Y. Khalaf, A. Tobias, F. J. Broekmans, M. K. Khairy, I. D. Gallos and A. Coomarasamy (2025). "Controlled ovarian stimulation protocols for assisted reproduction: a network meta-analysis." Cochrane Database Syst Rev 7(7): CD012586.

Lobo, R., S. Santos-Ribeiro, A. Falahati, K. Moley, A. Pinborg, N. S. Macklon and I. E. Jepsen (2025). "One-year cumulative live birth rate associated with the number of oocytes in ovarian stimulation with follitropin delta: a pooled analysis of four randomized controlled trials." Hum Reprod 40(8): 1526–1534.

Kuan, K. K. W., S. Omoseni and J. A. Tello (2023). "Comparing ART outcomes in women with endometriosis after GnRH agonist versus GnRH antagonist ovarian stimulation: a systematic review." Ther Adv Endocrinol Metab 14: 20420188231173325.

Ren, J., A. Sha, D. Han, P. Li, J. Geng and C. Ma (2014). "Does prolonged pituitary down-regulation with gonadotropin-releasing hormone agonist improve the live-birth rate in in vitro fertilization treatment?" Fertil Steril 102(1): 75–81.

Song, J., C. Duan, W. Cai, W. Wu, H. Lv and J. Xu (2020). "Comparison of GnRH-a Prolonged Protocol and Short GnRH-a Long Protocol in Patients with Thin Endometrium for Assisted Reproduction: A Retrospective Cohort Study." Drug Des Devel Ther 14: 3673–3682.

Tian, L. F., J. Tan, Y. Zou, Q. Su, Y. Li, D. F. Xu and Q. F. Wu (2019). "Mild starting dosage ovarian stimulation combined with a modified prolonged GnRH-a protocol improved IVF/ICSI outcomes in normal ovarian responders." Arch Med Sci 15(5): 1294–1300.

Xu, B., D. Geerts, S. Hu, J. Yue, Z. Li, G. Zhu and L. Jin (2020). "The depot GnRH agonist protocol improves the live birth rate per fresh embryo transfer cycle, but not the cumulative live birth rate in normal responders: a randomized controlled trial and molecular mechanism study." Hum Reprod 35(6): 1306–1318.

La Marca, A. and S. K. Sunkara (2014). "Individualization of controlled ovarian stimulation in IVF using ovarian reserve markers: from theory to practice." Hum Reprod Update 20(1): 124–140.

Toftager, M., J. Bogstad, K. Lossl, L. Praetorius, A. Zedeler, T. Bryndorf, L. Nilas and A. Pinborg (2017). "Cumulative live birth rates after one ART cycle including all subsequent frozen-thaw cycles in 1050 women: secondary outcome of an RCT comparing GnRH-antagonist and GnRH-agonist protocols." Hum Reprod 32(3): 556–567.

Wei, D., Y. Sun, H. Zhao, J. Yan, H. Zhou, F. Gong, A. Zhang, Z. Wang, L. Jin, H. Bao, S. Zhao, Z. Xiao, Y. Qin, L. Geng, L. Cui, Y. Sheng, M. Sun, P. Liu, L. Ding, H. Liu, K. Wu, Y. Li, Y. Lu, B. Xu, B. Xu, L. Zhang, H. Zhang, R. S. Legro and Z. J. Chen (2025). "Frozen versus fresh embryo transfer in women with low prognosis for in vitro fertilisation treatment: pragmatic, multicentre, randomised controlled trial." BMJ 388: e081474.

Yang, J., X. Zhang, X. Ding, Y. Wang, G. Huang and H. Ye (2021). "Cumulative live birth rates between GnRH-agonist long and GnRH-antagonist protocol in one ART cycle when all embryos transferred: real-word data of 18,853 women from China." Reprod Biol Endocrinol 19(1): 124.

Stimulation, E. G. G. o. O., B. Ata, E. Bosch, S. Broer, G. Griesinger, M. Grynberg, E. Kolibianakis, M. Kunicki, A. La Marca, G. Lainas, N. Le Clef, N. Massin, N. P. Polyzos, S. K. Sunkara, T. Timeva, M. Toyli, J. Urbancsek and F. Broekmans (2026). "ESHRE guideline: ovarian stimulation for IVF/ICSI: an update in 2025dagger." Hum Reprod.

Melo, P., A. Eapen, Y. Chung, Y. Jeve, M. J. Price, S. K. Sunkara, N. S. Macklon, Y. Khalaf, A. Tobias, F. J. Broekmans, M. K. Khairy, I. D. Gallos and A. Coomarasamy (2025). "Controlled ovarian stimulation protocols for assisted reproduction: a network meta-analysis." Cochrane Database Syst Rev 7(7): CD012586.

Lobo, R., S. Santos-Ribeiro, A. Falahati, K. Moley, A. Pinborg, N. S. Macklon and I. E. Jepsen (2025). "One-year cumulative live birth rate associated with the number of oocytes in ovarian stimulation with follitropin delta: a pooled analysis of four randomized controlled trials." Hum Reprod 40(8): 1526–1534.

Kuan, K. K. W., S. Omoseni and J. A. Tello (2023). "Comparing ART outcomes in women with endometriosis after GnRH agonist versus GnRH antagonist ovarian stimulation: a systematic review." Ther Adv Endocrinol Metab 14: 20420188231173325.

Ren, J., A. Sha, D. Han, P. Li, J. Geng and C. Ma (2014). "Does prolonged pituitary down-regulation with gonadotropin-releasing hormone agonist improve the live-birth rate in in vitro fertilization treatment?" Fertil Steril 102(1): 75–81.

Song, J., C. Duan, W. Cai, W. Wu, H. Lv and J. Xu (2020). "Comparison of GnRH-a Prolonged Protocol and Short GnRH-a Long Protocol in Patients with Thin Endometrium for Assisted Reproduction: A Retrospective Cohort Study." Drug Des Devel Ther 14: 3673–3682.

Tian, L. F., J. Tan, Y. Zou, Q. Su, Y. Li, D. F. Xu and Q. F. Wu (2019). "Mild starting dosage ovarian stimulation combined with a modified prolonged GnRH-a protocol improved IVF/ICSI outcomes in normal ovarian responders." Arch Med Sci 15(5): 1294–1300.

Xu, B., D. Geerts, S. Hu, J. Yue, Z. Li, G. Zhu and L. Jin (2020). "The depot GnRH agonist protocol improves the live birth rate per fresh embryo transfer cycle, but not the cumulative live birth rate in normal responders: a randomized controlled trial and molecular mechanism study." Hum Reprod 35(6): 1306–1318.

La Marca, A. and S. K. Sunkara (2014). "Individualization of controlled ovarian stimulation in IVF using ovarian reserve markers: from theory to practice." Hum Reprod Update 20(1): 124–140.

Toftager, M., J. Bogstad, K. Lossl, L. Praetorius, A. Zedeler, T. Bryndorf, L. Nilas and A. Pinborg (2017). "Cumulative live birth rates after one ART cycle including all subsequent frozen-thaw cycles in 1050 women: secondary outcome of an RCT comparing GnRH-antagonist and GnRH-agonist protocols." Hum Reprod 32(3): 556–567.

Yang, J., X. Zhang, X. Ding, Y. Wang, G. Huang and H. Ye (2021). "Cumulative live birth rates between GnRH-agonist long and GnRH-antagonist protocol in one ART cycle when all embryos transferred: real-word data of 18,853 women from China." Reprod Biol Endocrinol 19(1): 124.

Stimulation, E. G. G. o. O., B. Ata, E. Bosch, S. Broer, G. Griesinger, M. Grynberg, E. Kolibianakis, M. Kunicki, A. La Marca, G. Lainas, N. Le Clef, N. Massin, N. P. Polyzos, S. K. Sunkara, T. Timeva, M. Toyli, J. Urbancsek and F. Broekmans (2026). "ESHRE guideline: ovarian stimulation for IVF/ICSI: an update in 2025dagger." Hum Reprod.

Melo, P., A. Eapen, Y. Chung, Y. Jeve, M. J. Price, S. K. Sunkara, N. S. Macklon, Y. Khalaf, A. Tobias, F. J. Broekmans, M. K. Khairy, I. D. Gallos and A. Coomarasamy (2025). "Controlled ovarian stimulation protocols for assisted reproduction: a network meta-analysis." Cochrane Database Syst Rev 7(7): CD012586.

Lobo, R., S. Santos-Ribeiro, A. Falahati, K. Moley, A. Pinborg, N. S. Macklon and I. E. Jepsen (2025). "One-year cumulative live birth rate associated with the number of oocytes in ovarian stimulation with follitropin delta: a pooled analysis of four randomized controlled trials." Hum Reprod 40(8): 1526–1534.

Kuan, K. K. W., S. Omoseni and J. A. Tello (2023). "Comparing ART outcomes in women with endometriosis after GnRH agonist versus GnRH antagonist ovarian stimulation: a systematic review." Ther Adv Endocrinol Metab 14: 20420188231173325.

Ren, J., A. Sha, D. Han, P. Li, J. Geng and C. Ma (2014). "Does prolonged pituitary down-regulation with gonadotropin-releasing hormone agonist improve the live-birth rate in in vitro fertilization treatment?" Fertil Steril 102(1): 75–81.

Song, J., C. Duan, W. Cai, W. Wu, H. Lv and J. Xu (2020). "Comparison of GnRH-a Prolonged Protocol and Short GnRH-a Long Protocol in Patients with Thin Endometrium for Assisted Reproduction: A Retrospective Cohort Study." Drug Des Devel Ther 14: 3673–3682.

Tian, L. F., J. Tan, Y. Zou, Q. Su, Y. Li, D. F. Xu and Q. F. Wu (2019). "Mild starting dosage ovarian stimulation combined with a modified prolonged GnRH-a protocol improved IVF/ICSI outcomes in normal ovarian responders." Arch Med Sci 15(5): 1294–1300.

Xu, B., D. Geerts, S. Hu, J. Yue, Z. Li, G. Zhu and L. Jin (2020). "The depot GnRH agonist protocol improves the live birth rate per fresh embryo transfer cycle, but not the cumulative live birth rate in normal responders: a randomized controlled trial and molecular mechanism study." Hum Reprod 35(6): 1306–1318.

La Marca, A. and S. K. Sunkara (2014). "Individualization of controlled ovarian stimulation in IVF using ovarian reserve markers: from theory to practice." Hum Reprod Update 20(1): 124–140.

Toftager, M., J. Bogstad, K. Lossl, L. Praetorius, A. Zedeler, T. Bryndorf, L. Nilas and A. Pinborg (2017). "Cumulative live birth rates after one ART cycle including all subsequent frozen-thaw cycles in 1050 women: secondary outcome of an RCT comparing GnRH-antagonist and GnRH-agonist protocols." Hum Reprod 32(3): 556–567.

Wei, D., Y. Sun, H. Zhao, J. Yan, H. Zhou, F. Gong, A. Zhang, Z. Wang, L. Jin, H. Bao, S. Zhao, Z. Xiao, Y. Qin, L. Geng, L. Cui, Y. Sheng, M. Sun, P. Liu, L. Ding, H. Liu, K. Wu, Y. Li, Y. Lu, B. Xu, B. Xu, L. Zhang, H. Zhang, R. S. Legro and Z. J. Chen (2025). "Frozen versus fresh embryo transfer in women with low prognosis for in vitro fertilisation treatment: pragmatic, multicentre, randomised controlled trial." BMJ 388: e081474.

Yang, J., X. Zhang, X. Ding, Y. Wang, G. Huang and H. Ye (2021). "Cumulative live birth rates between GnRH-agonist long and GnRH-antagonist protocol in one ART cycle when all embryos transferred: real-word data of 18,853 women from China." Reprod Biol Endocrinol 19(1): 124.

Liu, J., F. Liu, W. Xu, L. Zhang, Q. Tian, L. Du, S. Li and M. Zhang (2025). "Risk prediction models for ovarian hyperstimulation syndrome: a systematic review and meta-analysis." BMC Pregnancy Childbirth 25(1): 860.

Stimulation, E. G. G. o. O., B. Ata, E. Bosch, S. Broer, G. Griesinger, M. Grynberg, E. Kolibianakis, M. Kunicki, A. La Marca, G. Lainas, N. Le Clef, N. Massin, N. P. Polyzos, S. K. Sunkara, T. Timeva, M. Toyli, J. Urbancsek and F. Broekmans (2026). "ESHRE guideline: ovarian stimulation for IVF/ICSI: an update in 2025dagger." Hum Reprod.

Melo, P., A. Eapen, Y. Chung, Y. Jeve, M. J. Price, S. K. Sunkara, N. S. Macklon, Y. Khalaf, A. Tobias, F. J. Broekmans, M. K. Khairy, I. D. Gallos and A. Coomarasamy (2025). "Controlled ovarian stimulation protocols for assisted reproduction: a network meta-analysis." Cochrane Database Syst Rev 7(7): CD012586.

Lobo, R., S. Santos-Ribeiro, A. Falahati, K. Moley, A. Pinborg, N. S. Macklon and I. E. Jepsen (2025). "One-year cumulative live birth rate associated with the number of oocytes in ovarian stimulation with follitropin delta: a pooled analysis of four randomized controlled trials." Hum Reprod 40(8): 1526–1534.

Kuan, K. K. W., S. Omoseni and J. A. Tello (2023). "Comparing ART outcomes in women with endometriosis after GnRH agonist versus GnRH antagonist ovarian stimulation: a systematic review." Ther Adv Endocrinol Metab 14: 20420188231173325.

Ren, J., A. Sha, D. Han, P. Li, J. Geng and C. Ma (2014). "Does prolonged pituitary down-regulation with gonadotropin-releasing hormone agonist improve the live-birth rate in in vitro fertilization treatment?" Fertil Steril 102(1): 75–81.

Song, J., C. Duan, W. Cai, W. Wu, H. Lv and J. Xu (2020). "Comparison of GnRH-a Prolonged Protocol and Short GnRH-a Long Protocol in Patients with Thin Endometrium for Assisted Reproduction: A Retrospective Cohort Study." Drug Des Devel Ther 14: 3673–3682.

Tian, L. F., J. Tan, Y. Zou, Q. Su, Y. Li, D. F. Xu and Q. F. Wu (2019). "Mild starting dosage ovarian stimulation combined with a modified prolonged GnRH-a protocol improved IVF/ICSI outcomes in normal ovarian responders." Arch Med Sci 15(5): 1294–1300.

Xu, B., D. Geerts, S. Hu, J. Yue, Z. Li, G. Zhu and L. Jin (2020). "The depot GnRH agonist protocol improves the live birth rate per fresh embryo transfer cycle, but not the cumulative live birth rate in normal responders: a randomized controlled trial and molecular mechanism study." Hum Reprod 35(6): 1306–1318.

La Marca, A. and S. K. Sunkara (2014). "Individualization of controlled ovarian stimulation in IVF using ovarian reserve markers: from theory to practice." Hum Reprod Update 20(1): 124–140.

Toftager, M., J. Bogstad, K. Lossl, L. Praetorius, A. Zedeler, T. Bryndorf, L. Nilas and A. Pinborg (2017). "Cumulative live birth rates after one ART cycle including all subsequent frozen-thaw cycles in 1050 women: secondary outcome of an RCT comparing GnRH-antagonist and GnRH-agonist protocols." Hum Reprod 32(3): 556–567.

Wei, D., Y. Sun, H. Zhao, J. Yan, H. Zhou, F. Gong, A. Zhang, Z. Wang, L. Jin, H. Bao, S. Zhao, Z. Xiao, Y. Qin, L. Geng, L. Cui, Y. Sheng, M. Sun, P. Liu, L. Ding, H. Liu, K. Wu, Y. Li, Y. Lu, B. Xu, B. Xu, L. Zhang, H. Zhang, R. S. Legro and Z. J. Chen (2025). "Frozen versus fresh embryo transfer in women with low prognosis for in vitro fertilisation treatment: pragmatic, multicentre, randomised controlled trial." BMJ 388: e081474.

Yang, J., X. Zhang, X. Ding, Y. Wang, G. Huang and H. Ye (2021). "Cumulative live birth rates between GnRH-agonist long and GnRH-antagonist protocol in one ART cycle when all embryos transferred: real-word data of 18,853 women from China." Reprod Biol Endocrinol 19(1): 124.

Liu, J., F. Liu, W. Xu, L. Zhang, Q. Tian, L. Du, S. Li and M. Zhang (2025). "Risk prediction models for ovarian hyperstimulation syndrome: a systematic review and meta-analysis." BMC Pregnancy Childbirth 25(1): 860.

Zhou, J., Y. Chen, L. Bai, W. Zhou, H. Yang, Y. Chen, L. Chen, R. Lu, L. Hu and S. Wang (2024). "Ovarian Hyperstimulation syndrome combined with hypothyroidism: a comprehensive review." J Ovarian Res 17(1): 98.

Stimulation, E. G. G. o. O., B. Ata, E. Bosch, S. Broer, G. Griesinger, M. Grynberg, E. Kolibianakis, M. Kunicki, A. La Marca, G. Lainas, N. Le Clef, N. Massin, N. P. Polyzos, S. K. Sunkara, T. Timeva, M. Toyli, J. Urbancsek and F. Broekmans (2026). "ESHRE guideline: ovarian stimulation for IVF/ICSI: an update in 2025dagger." Hum Reprod.

Melo, P., A. Eapen, Y. Chung, Y. Jeve, M. J. Price, S. K. Sunkara, N. S. Macklon, Y. Khalaf, A. Tobias, F. J. Broekmans, M. K. Khairy, I. D. Gallos and A. Coomarasamy (2025). "Controlled ovarian stimulation protocols for assisted reproduction: a network meta-analysis." Cochrane Database Syst Rev 7(7): CD012586.

Lobo, R., S. Santos-Ribeiro, A. Falahati, K. Moley, A. Pinborg, N. S. Macklon and I. E. Jepsen (2025). "One-year cumulative live birth rate associated with the number of oocytes in ovarian stimulation with follitropin delta: a pooled analysis of four randomized controlled trials." Hum Reprod 40(8): 1526–1534.

Kuan, K. K. W., S. Omoseni and J. A. Tello (2023). "Comparing ART outcomes in women with endometriosis after GnRH agonist versus GnRH antagonist ovarian stimulation: a systematic review." Ther Adv Endocrinol Metab 14: 20420188231173325.

Ren, J., A. Sha, D. Han, P. Li, J. Geng and C. Ma (2014). "Does prolonged pituitary down-regulation with gonadotropin-releasing hormone agonist improve the live-birth rate in in vitro fertilization treatment?" Fertil Steril 102(1): 75–81.

Song, J., C. Duan, W. Cai, W. Wu, H. Lv and J. Xu (2020). "Comparison of GnRH-a Prolonged Protocol and Short GnRH-a Long Protocol in Patients with Thin Endometrium for Assisted Reproduction: A Retrospective Cohort Study." Drug Des Devel Ther 14: 3673–3682.

Tian, L. F., J. Tan, Y. Zou, Q. Su, Y. Li, D. F. Xu and Q. F. Wu (2019). "Mild starting dosage ovarian stimulation combined with a modified prolonged GnRH-a protocol improved IVF/ICSI outcomes in normal ovarian responders." Arch Med Sci 15(5): 1294–1300.

Xu, B., D. Geerts, S. Hu, J. Yue, Z. Li, G. Zhu and L. Jin (2020). "The depot GnRH agonist protocol improves the live birth rate per fresh embryo transfer cycle, but not the cumulative live birth rate in normal responders: a randomized controlled trial and molecular mechanism study." Hum Reprod 35(6): 1306–1318.

La Marca, A. and S. K. Sunkara (2014). "Individualization of controlled ovarian stimulation in IVF using ovarian reserve markers: from theory to practice." Hum Reprod Update 20(1): 124–140.

Toftager, M., J. Bogstad, K. Lossl, L. Praetorius, A. Zedeler, T. Bryndorf, L. Nilas and A. Pinborg (2017). "Cumulative live birth rates after one ART cycle including all subsequent frozen-thaw cycles in 1050 women: secondary outcome of an RCT comparing GnRH-antagonist and GnRH-agonist protocols." Hum Reprod 32(3): 556–567.

Wei, D., Y. Sun, H. Zhao, J. Yan, H. Zhou, F. Gong, A. Zhang, Z. Wang, L. Jin, H. Bao, S. Zhao, Z. Xiao, Y. Qin, L. Geng, L. Cui, Y. Sheng, M. Sun, P. Liu, L. Ding, H. Liu, K. Wu, Y. Li, Y. Lu, B. Xu, B. Xu, L. Zhang, H. Zhang, R. S. Legro and Z. J. Chen (2025). "Frozen versus fresh embryo transfer in women with low prognosis for in vitro fertilisation treatment: pragmatic, multicentre, randomised controlled trial." BMJ 388: e081474.

Yang, J., X. Zhang, X. Ding, Y. Wang, G. Huang and H. Ye (2021). "Cumulative live birth rates between GnRH-agonist long and GnRH-antagonist protocol in one ART cycle when all embryos transferred: real-word data of 18,853 women from China." Reprod Biol Endocrinol 19(1): 124.

Zhou, J., Y. Chen, L. Bai, W. Zhou, H. Yang, Y. Chen, L. Chen, R. Lu, L. Hu and S. Wang (2024). "Ovarian Hyperstimulation syndrome combined with hypothyroidism: a comprehensive review." J Ovarian Res 17(1): 98.

Baerwald, A. R., G. P. Adams and R. A. Pierson (2003). "A new model for ovarian follicular development during the human menstrual cycle." Fertil Steril 80(1): 116–122.

Stimulation, E. G. G. o. O., B. Ata, E. Bosch, S. Broer, G. Griesinger, M. Grynberg, E. Kolibianakis, M. Kunicki, A. La Marca, G. Lainas, N. Le Clef, N. Massin, N. P. Polyzos, S. K. Sunkara, T. Timeva, M. Toyli, J. Urbancsek and F. Broekmans (2026). "ESHRE guideline: ovarian stimulation for IVF/ICSI: an update in 2025dagger." Hum Reprod.

Melo, P., A. Eapen, Y. Chung, Y. Jeve, M. J. Price, S. K. Sunkara, N. S. Macklon, Y. Khalaf, A. Tobias, F. J. Broekmans, M. K. Khairy, I. D. Gallos and A. Coomarasamy (2025). "Controlled ovarian stimulation protocols for assisted reproduction: a network meta-analysis." Cochrane Database Syst Rev 7(7): CD012586.

Lobo, R., S. Santos-Ribeiro, A. Falahati, K. Moley, A. Pinborg, N. S. Macklon and I. E. Jepsen (2025). "One-year cumulative live birth rate associated with the number of oocytes in ovarian stimulation with follitropin delta: a pooled analysis of four randomized controlled trials." Hum Reprod 40(8): 1526–1534.

Kuan, K. K. W., S. Omoseni and J. A. Tello (2023). "Comparing ART outcomes in women with endometriosis after GnRH agonist versus GnRH antagonist ovarian stimulation: a systematic review." Ther Adv Endocrinol Metab 14: 20420188231173325.

Ren, J., A. Sha, D. Han, P. Li, J. Geng and C. Ma (2014). "Does prolonged pituitary down-regulation with gonadotropin-releasing hormone agonist improve the live-birth rate in in vitro fertilization treatment?" Fertil Steril 102(1): 75–81.

Song, J., C. Duan, W. Cai, W. Wu, H. Lv and J. Xu (2020). "Comparison of GnRH-a Prolonged Protocol and Short GnRH-a Long Protocol in Patients with Thin Endometrium for Assisted Reproduction: A Retrospective Cohort Study." Drug Des Devel Ther 14: 3673–3682.

Xu, B., D. Geerts, S. Hu, J. Yue, Z. Li, G. Zhu and L. Jin (2020). "The depot GnRH agonist protocol improves the live birth rate per fresh embryo transfer cycle, but not the cumulative live birth rate in normal responders: a randomized controlled trial and molecular mechanism study." Hum Reprod 35(6): 1306–1318.

La Marca, A. and S. K. Sunkara (2014). "Individualization of controlled ovarian stimulation in IVF using ovarian reserve markers: from theory to practice." Hum Reprod Update 20(1): 124–140.

Toftager, M., J. Bogstad, K. Lossl, L. Praetorius, A. Zedeler, T. Bryndorf, L. Nilas and A. Pinborg (2017). "Cumulative live birth rates after one ART cycle including all subsequent frozen-thaw cycles in 1050 women: secondary outcome of an RCT comparing GnRH-antagonist and GnRH-agonist protocols." Hum Reprod 32(3): 556–567.

Wei, D., Y. Sun, H. Zhao, J. Yan, H. Zhou, F. Gong, A. Zhang, Z. Wang, L. Jin, H. Bao, S. Zhao, Z. Xiao, Y. Qin, L. Geng, L. Cui, Y. Sheng, M. Sun, P. Liu, L. Ding, H. Liu, K. Wu, Y. Li, Y. Lu, B. Xu, B. Xu, L. Zhang, H. Zhang, R. S. Legro and Z. J. Chen (2025). "Frozen versus fresh embryo transfer in women with low prognosis for in vitro fertilisation treatment: pragmatic, multicentre, randomised controlled trial." BMJ 388: e081474.

Yang, J., X. Zhang, X. Ding, Y. Wang, G. Huang and H. Ye (2021). "Cumulative live birth rates between GnRH-agonist long and GnRH-antagonist protocol in one ART cycle when all embryos transferred: real-word data of 18,853 women from China." Reprod Biol Endocrinol 19(1): 124.

Liu, J., F. Liu, W. Xu, L. Zhang, Q. Tian, L. Du, S. Li and M. Zhang (2025). "Risk prediction models for ovarian hyperstimulation syndrome: a systematic review and meta-analysis." BMC Pregnancy Childbirth 25(1): 860.

Zhou, J., Y. Chen, L. Bai, W. Zhou, H. Yang, Y. Chen, L. Chen, R. Lu, L. Hu and S. Wang (2024). "Ovarian Hyperstimulation syndrome combined with hypothyroidism: a comprehensive review." J Ovarian Res 17(1): 98.

Baerwald, A. R., G. P. Adams and R. A. Pierson (2003). "A new model for ovarian follicular development during the human menstrual cycle." Fertil Steril 80(1): 116–122.

Baerwald, A. R., G. P. Adams and R. A. Pierson (2003). "Characterization of ovarian follicular wave dynamics in women." Biol Reprod 69(3): 1023–1031.

Stimulation, E. G. G. o. O., et al. (2026). "ESHRE guideline: ovarian stimulation for IVF/ICSI: an update in 2025dagger." Hum Reprod.

STUDY QUESTION: What is the recommended management of ovarian stimulation, based on the best available evidence in the literature? SUMMARY ANSWER: This updated ESHRE guideline on ovarian stimulation for IVF/ICSI provides 121 recommendations, answering 21 key questions on ovarian stimulation for IVF/ICSI. WHAT IS KNOWN ALREADY? Before the ESHRE guideline on ovarian stimulation for IVF/ICSI was published in 2019, ovarian stimulation for IVF/ICSI had only been discussed briefly in the National Institute for Health and Care Excellence guideline on fertility problems and in a statement by the Royal Australian and New Zealand College of Obstetricians and Gynaecologists. STUDY DESIGN, SIZE, DURATION: The guideline was developed according to the structured methodology for ESHRE guidelines. The 18 key questions from the 2019 version of the guideline were revised by the Guideline Development Group (GDG). This resulted in the addition of one new key question, the splitting of the key question on fertility preservation in three separate key questions (fertility preservation for women facing gonadotoxic treatment, elective oocyte cryopreservation, and oocyte donation) and several new interventions being added to the existing key questions. Papers published between 31 October 2018 and 2 February 2025 and written in English were included. The critical outcomes for this guideline were efficacy in terms of cumulative live birth rate per started cycle or live birth rate per started cycle, as well as safety in terms of the rate of occurrence of moderate and/or severe ovarian hyperstimulation syndrome (OHSS). PARTICIPANTS/MATERIALS, SETTING, METHODS: Based on the available evidence, recommendations were formulated and discussed until consensus was reached within the GDG. Following stakeholder review of the initial draft, the final version was approved by the GDG and ultimately by the ESHRE Executive Committee. MAIN RESULTS AND THE ROLE OF CHANCE: The guideline provides a total of 121 recommendations: 42 recommendations remained unchanged in 2019, 4 recommendations were reworded for better understanding, 29 recommendations were updated in view of new evidence, and 46 new recommendations for 2025 have been formulated. The guideline provides 4 recommendations on pre-stimulation evaluation, 7 recommendations on pre-treatment therapies, 50 recommendations on pituitary suppression and ovarian stimulation, 17 recommendations on monitoring, 18 recommendations on triggering of final oocyte maturation and luteal support, and 8 recommendations on the prevention of OHSS. In addition, the guideline provides 17 recommendations on fertility preservation, both oncologic and elective, and oocyte donation. These include 90 evidence-based recommendations, of which only 42 were formulated as strong recommendations and 48 as conditional, as well as 29 good practice points and 2 research-only recommendations. Of the evidence-based recommendations, none were supported by high-quality evidence, 6 by moderate-quality evidence, 36 by low-quality evidence, and 148 by very low-quality evidence. To support future research on ovarian stimulation for IVF/ICSI, a list of research recommendations was provided. LIMITATIONS, REASONS FOR CAUTION: Several newer interventions are not well studied yet. For most of these interventions, a recommendation against the intervention or a research-only recommendation was formulated based on insufficient evidence. Future studies may require these recommendations to be revised. WIDER IMPLICATIONS OF THE FINDINGS: The guideline provides clinicians with clear advice on best practice in ovarian stimulation, based on the best evidence available. In addition, a list of research recommendations is provided to promote further studies in ovarian stimulation. STUDY FUNDING/COMPETING INTEREST(S): The guideline was developed by ESHRE, who funded the guideline meetings, literature searches, and dissemination of the guideline. The guideline group members did not receive any financial incentives; all work was provided voluntarily. BA reports speaker's fees from Gedeon-Richter, Ferring, IBSA, Intas, Merck, Organon, consulting fees from Merck, Organon, Oxolife, stock options from Global Fertility Solutions LLC (employee co-investment), and was chair of the Turkish Society of Reproductive Medicine. EB reports research grants from Roche Diagnostics and IBSA, consulting fees from MSD, Abbot, Gedeon-Richter, Roche, speaker's fees from IBSA, MSD, Ferring Pharmaceuticals, Abbot, Gedeon-Richter, Merck, Roche, participation in the advisory board of Ferring Pharmaceuticals, IBSA and Merck, and ownership interest from IVI-RMS Valencia. GG was part of the ESHRE working group on Recurrent Implantation Failure and the ESHRE working group on clinical KPISs, reports travel support from Merck, Organon, Ferring, Theramex, Gedeon-Richter, Abbott, consulting fees from Organon, Ferring, Merck, Gedeon-Richter, Theramex, Abbott, ReproNovo, Igyxos, OxoLife, Philipps, ReprodWissen, PregLem, Guerbet, Roche, IBSA, and Besins, speaker's fees from Organon, Ferring, Merck, Gedeon-Richter, Theramex, Abbott, ReproNovo, Igyxos, OxoLife, Philipps, ReprodWissen, PregLem, Guerbet, Roche, IBSA, and Besins, and research grants from Besin, Merck, Abbott, Ferring, Theramex. MG reports speaker's fees from Merck Serono, Ferring, and Gedeon Richter. EK reports travel/hotel expenses from Ferring, Merck SERONO, Vianex, speaker's fees from Ferring, Merck SERONO, Vianex, and is chair of the Greek Society of Fertility and Sterility. MK reports travel support and speaker's fees from Ferring. ALM reports research grants from Merck, Ferring, IBSA, Roche, Organon, Theramex, Beckman Coulter, and Gedeon-Richter, consulting fees from Merck, Ferring, IBSA, Roche, Organon, Theramex, Beckman Coulter, and Gedeon-Richter, speaker's fees from Merck, Ferring, IBSA, Roche, Organon, Theramex, Beckman Coulter, Gedeon-Richter, and participation on an advisory board of Merck, Organon, Ferring, Theramex, Gedeon Richter, and IBSA. GL reports consulting fees from Ferring and Merck, speaker's fees from Ferring, Merck, Gedeon-Richter, Organon, and Vianex, expert testimony fees from Cook, travel support from ESHRE, Ferring, Merck, Gedeon-Richter, Organon, and Vianex, is on the advisory board of Merck and Ferring, and participated in an ESHRE committee and on the Greek Fertility and Sterility Committee. NM reports research grants from IBSA, Organon, consulting fees from Organon, Merck, GE, Ferring, Abbott, and Cooper, and speaker's fees from Ferring, GE, Organon, IBSA, Merck, Theramex. NPP reports research grants from Besins Healthcare, Ferring Pharmaceutical, Merck Serono, Organon, Roche Diagnostics, and Theramex, consulting fees from Besins Healthcare, Alife, Ferring, IBSA, Merck Serono, Organon, Abbott, FertilAI, and speaker's fees from Besins Healthcare, Roche Diagnostics, Ferring Pharmaceuticals, Gedeon-Richter, IBSA, Merck Serono, Organon, and Theramex. SKS reports a research grant from Ferring, travel support from Merck and INTAS, consulting fees from Merck, and speaker's fees from Merck, MSD, INTAS, and Ferring. TT reports travel support from Merck, speaker's fees from Merck, Organon, MSD and is editor-in-chief of a Bulgarian journal, Reproductive Health. MT reports travel support from IBSA, Ferring, and Merck, consulting fees from Abbott and is a member of the board of the Finnish Endocrine Society. JU is a member of the Steering Committee of Richter Reproduction Network and received travel support from IBSA. FB reports a research grant from Besins, is on the advisory board of Merck and Abbott, reports speaker's fees from Ferring, Merck, Besins, Intas Fermaceuticals, PREIS School; he is the owner of FRANKSCHOOL RforL. The other authors have nothing to disclose. TRIAL REGISTRATION NUMBER: N/A. DISCLAIMER: This guideline represents the views of ESHRE, which were achieved after careful consideration of the scientific evidence available at the time of preparation. In the absence of scientific evidence on certain aspects, a consensus between the relevant ESHRE stakeholders has been obtained.Adherence to these clinical practice guidelines does not guarantee a successful or specific outcome, nor does it establish a standard of care. Clinical practice guidelines do not replace the need for application of clinical judgment to each individual presentation, nor variations based on locality and facility type.ESHRE makes no warranty, express or implied, regarding the clinical practice guidelines and specifically excludes any warranties of merchantability and fitness for a particular use or purpose. (The full disclaimer is available at www.eshre.eu/guidelines.).

Melo, P., et al. (2025). "Controlled ovarian stimulation protocols for assisted reproduction: a network meta-analysis." Cochrane Database Syst Rev 7(7): CD012586.

BACKGROUND: Controlled ovarian stimulation (COS) is an essential step in most assisted conception cycles. Different treatment combinations (termed protocols) exist in COS, yet there is no consensus on their relative effectiveness and safety. OBJECTIVES: We aimed to assess the relative effectiveness and safety of COS protocols in clinical practice. SEARCH METHODS: We followed standard Cochrane methodology to conduct extensive electronic searches to 11 June 2024. SELECTION CRITERIA: We included randomised controlled trials (RCTs) comparing at least two COS protocols using any form of pituitary suppression (gonadotrophin-releasing hormone (GnRH) agonists, antagonists or progestogens) and human menopausal gonadotropin (hMG), urinary or recombinant follicle-stimulating hormone (u/rFSH), with or without luteinising hormone (LH) and/or oral medications (e.g. clomifene or letrozole), for ovarian stimulation. The primary outcomes were the rates of live birth or ongoing pregnancy (LBR or OPR) and ovarian hyperstimulation syndrome (OHSS) per participant after one stimulation cycle. The secondary outcomes were the rates of clinical pregnancy, miscarriage, multiple pregnancy, ectopic pregnancy and cycle cancellation per participant, and the number of oocytes, cleavage-stage embryos, blastocyst-stage embryos and cryopreserved embryos per participant. DATA COLLECTION AND ANALYSIS: Two review authors independently selected studies and extracted data. We conducted pairwise and network meta-analyses (NMA) according to participants' predicted response to COS (normal/unselected, high or low). For each outcome and subgroup of women, we grouped treatment protocols into the following different networks: all pituitary suppression methods; all long GnRH agonist protocols; all short GnRH antagonist protocols; all GnRH agonist flare protocols; all protocols using progestogens for pituitary suppression; and all protocols using ovarian stimulation in the absence of pituitary suppression. Using the Cochrane RoB 1 tool, we restricted our primary analyses to RCTs at low risk of 'selection' and 'other' biases. We presented effect estimates as risk ratios (RR) for dichotomous outcomes, or mean difference (MD) for continuous outcomes, with 95% confidence intervals (CI). We used Review Manager and Stata 18 for the meta-analyses. MAIN RESULTS: We included 338 studies investigating a total of 15 pairwise comparisons between different COS protocols in 59,086 women. Of these, 226 trials included only women with predicted normal response or whose predicted response was unstated, 31 trials included only women with predicted high response and 81 trials included only women with predicted low response. Primary outcome (effectiveness) - LBR or OPR per woman randomised Pituitary suppression methods In women with predicted normal response, short antagonist protocols probably result in little to no difference in LBR or OPR versus long agonist protocols (RR 0.95, 95% CI 0.84 to 1.07; 8 studies, 2817 women; I(2) = 0%; moderate-certainty evidence). Network evidence also suggested that ovarian stimulation without pituitary suppression may reduce the LBR or OPR compared with short GnRH antagonist protocols (RR 0.71, 95% CI 0.57 to 0.90; low-certainty evidence) and with GnRH agonist flare protocols (RR 0.52, 95% CI 0.36 to 0.75; low-certainty evidence). Primary outcome (safety) - OHSS per woman randomised Pituitary suppression methods In women with predicted normal response, short GnRH antagonist protocols may reduce OHSS compared with long GnRH agonist protocols (RR 0.88, 95% CI 0.78 to 0.99; 7 studies, 2650 women; I(2) = 0%; low-certainty evidence). Short GnRH antagonist protocols In women with predicted high response receiving short GnRH antagonist protocols, hMG may reduce OHSS compared with rFSH (RR 0.45, 95% CI 0.3 to 0.68; 1 study, 619 women; low-certainty evidence). Secondary outcomes Clinical pregnancy Pituitary suppression methods In women with predicted normal response, network evidence suggested that ovarian stimulation without pituitary suppression lowers the clinical pregnancy rate compared with short GnRH antagonist protocols (RR 0.76, 95% CI 0.61 to 0.93; low-certainty evidence) and with GnRH agonist flare protocols (RR 0.60, 95% CI 0.44 to 0.82; low-certainty evidence). Cancellation Short GnRH antagonist protocols In women with predicted high response undergoing short GnRH antagonist protocols, hMG may increase cancellation compared with rFSH (RR 5.98, 95% CI 1.78 to 20.10; 1 study, 619 women; low-certainty evidence). For the remaining networks and participant subgroups (normal- and low-responding women), the evidence did not confidently identify differences between COS protocols and is not reported in the abstract. Oocyte number Pituitary suppression methods In women with predicted normal response, short GnRH antagonist protocols (MD -0.75, 95% CI -1.49 to -0.02; 17 studies, 4062 women; I(2) = 94%; low-certainty evidence), GnRH agonist flare protocols (MD -3.30, 95% CI -4.87 to -1.73; 1 study, 240 women; I(2) = 96%; low-certainty evidence) and protocols without pituitary suppression (MD -5.80, 95% CI -11.24 to -0.36; 2 studies, 714 women; low-certainty evidence) may lower the oocyte number compared with long GnRH agonist protocols, respectively. In women with predicted low response, short GnRH antagonist protocols may reduce the oocyte number versus long agonist protocols (MD -1.25, 95% CI -2.01 to -0.50; low-certainty evidence). Long GnRH agonist protocols In women with predicted normal response receiving long GnRH agonist protocols, combining rFSH and rLH reduces the oocyte number compared with rFSH alone (MD -0.81, 95% CI -1.33 to -0.28; 6 trials, 1289 women; I(2) = 0%; high-certainty evidence). Remaining evidence For the remaining networks, patient subgroups and secondary outcomes, the evidence did not confidently identify differences between COS protocols. AUTHORS' CONCLUSIONS: Short GnRH antagonist protocols may reduce OHSS rates in women with predicted normal response without compromising LBR or OPR. Ovarian stimulation without pituitary suppression may reduce the LBR or OPR compared with short GnRH antagonist protocols and with GnRH agonist flare protocols. In women with predicted high response receiving short GnRH antagonist protocols, hMG may reduce OHSS compared with rFSH. We were unable to meta-analyse results from 169 trials due to serious risk of selection or other biases, a lack of outcome data, or because of data reported in an unsuitable format for meta-analysis (e.g. per cycle); this led to underpowered analyses for several outcomes and pairwise comparisons. Future trials should focus on evaluating the effect of different COS protocols upon cumulative live birth rates, accounting for all embryo transfers (fresh and/or frozen) after a single stimulation cycle per participant.

Lobo, R., et al. (2025). "One-year cumulative live birth rate associated with the number of oocytes in ovarian stimulation with follitropin delta: a pooled analysis of four randomized controlled trials." Hum Reprod 40(8): 1526–1534.

STUDY QUESTION: What number of oocytes retrieved is associated with the highest cumulative live birth rates (CLBRs) in the fresh and subsequent frozen cycles following ovarian stimulation with follitropin delta? SUMMARY ANSWER: The CLBR increased with the number of oocytes retrieved, plateauing at 21-25 oocytes. WHAT IS KNOWN ALREADY: Live birth rate (LBR) per fresh cycle is the conventionally reported outcome of IVF; however, the marked increase in cryopreserved cycles in recent years suggests that the CLBR has emerged as a more relevant outcome. In the fresh cycle, the number of oocytes retrieved is regarded as a prognostic factor for LBR, and a similar association has been shown for CLBR. STUDY DESIGN, SIZE, DURATION: Pooled analysis including 1746 patients from four randomized controlled trials. Trials were identified from clinical trials available in the Ferring Pharmaceuticals database up to June 2023. Selected trials used follitropin delta for ovarian stimulation and collected outcome data from both fresh and frozen cycles. Follitropin delta dose-response trials, as well as trials investigating follitropin delta in repeated ovarian stimulation cycles, were excluded. Patients included in the analysis underwent ovarian stimulation with follitropin delta and had at least one oocyte retrieved. The outcome of CLBR in the fresh and subsequent frozen cycles was evaluated in relation to the number of oocytes retrieved. CLBR was calculated as the number of patients with at least one live birth divided by the number of all patients included in the analysis. PARTICIPANTS/MATERIALS, SETTING, METHODS: Trial participants were women, 18-42 years of age, who were undergoing their first or second IVF/ICSI cycle in a GnRH antagonist/agonist protocol. Triggering was performed with hCG or GnRH agonist, and insemination was performed by IVF or ICSI. Single or double blastocyst transfer was performed on Day 5 in the fresh cycle, and all viable surplus blastocysts were cryopreserved on Day 5 or Day 6. All pregnancies from the fresh cycle and frozen cycles initiated within 1 year after the start of stimulation were followed until birth. The association between the number of oocytes retrieved and CLBR was assessed using a logistic regression analysis with fractional polynomials to obtain predicted CLBR. Subgroup analyses were performed based on age, anti-Mullerian hormone (AMH), and number of oocytes retrieved. MAIN RESULTS AND THE ROLE OF CHANCE: Overall, 15 trials with follitropin delta were identified in the database. Of those, 11 trials were not eligible, and the remaining 4 trials were included. In total, 1746 patients were included in the analysis. The mean age was 33.8 years (range 21-42 years), and the median AMH level was 17.0 pmol/l (range 0.3-164.2 pmol/l). The vast majority of patients (1645 patients, 94.2%) were treated with a GnRH antagonist protocol, while 101 patients (5.8%) were treated with a GnRH agonist protocol. Overall, 1541 patients (88.3%) received hCG triggering, and 205 patients (11.7%) received GnRH agonist triggering. Frozen cycles (maximum of six) were initiated by 740 patients (42.4%). The study population underwent a total of 2948 cycles: 1746 fresh cycles (referring to ovarian stimulation cycles, with or without transfer) and 1202 frozen cycles (initiated cycles, with or without transfer). The mean number of oocytes retrieved was 12.4 (range 1-72), the fresh cycle LBR was 29.1%, and the CLBR was 51.4%. The CLBR increased with the number of oocytes retrieved up to a plateau starting at 21-25 oocytes. The CLBR reached above 60% at >15 oocytes and above 70% at >20 oocytes. The CLBR decreased with increasing age (57.1%, 51.6%, and 35.8% at <35, 35-37, and >/=38 years), while it was similar for AMH <15 and >/=15 pmol/l (52.0% and 50.9%, respectively). A continued increase in predicted CLBR from 15 oocytes retrieved was observed in older patients (>/=38 years); from 41.3% to 53.4% to 58.7% at 15-19, 20-24, and >/=25 oocytes. No equivalent benefit was observed in younger patients (<38 years), where corresponding rates were 72.5%, 68.0%, and 78.8% in patients <35 years and 70.3%, 73.1%, and 71.5% in patients 35-37 years. The fresh cycle LBR decreased beyond 14 oocytes, while the CLBR continued to increase by the number of oocytes retrieved. LIMITATIONS, REASONS FOR CAUTION: A limited number of patients included in the analysis had >/=20 oocytes retrieved (249 patients, 14.3%). WIDER IMPLICATIONS OF THE FINDINGS: This analysis suggests an increase in CLBR with the number of oocytes retrieved up to a plateau starting at 21-25 oocytes following ovarian stimulation cycles with follitropin delta and subsequent frozen cycles. An increase in CLBR from 20 oocytes was evident in older but not in younger patients. STUDY FUNDING/COMPETING INTEREST(S): The study was funded by Ferring Pharmaceuticals A/S, Copenhagen, Denmark. S.S.-R. has received research funding from Organon/MSD, Theramex, and Gedeon-Richter, consulting fees from Organon/MSD, Ferring Pharmaceuticals, Merck Serono, and IBSA, payment or honoraria from Organon/MSD, Besins and Gedeon-Richter, support for attending meetings from Gedeon-Richter and Besins, is an advisory board member for TTRANSPORT and Deputy of the ESHRE SQART SIG, and owns stocks of IVI Lisboa, Clinica de Reproducao assistida Lda. A.P. has received grants from Cryos, grants and payments from Gedeon Richter, Ferring Pharmaceuticals and Merck A/S, payments from Organon, consulting fees from IBSA, Ferring Pharmaceuticals, Gedeon Richter, Cryos, and Merck A/S, and travel support from Gedeon Richter. N.S.M. has received speaker and consultancy fees from Ferring Pharmaceuticals, IBSA, Merck, Freya, and Gedeon Richter, and is a shareholder in Verso Biosense. K.M. has been a scientific advisor for Calla Lily Clinical Care, Evvy, and AutoIVF. R.L., A.F., K.M., and I.E.J. are employees of Ferring Pharmaceuticals. REGISTRATION NUMBER: N/A.

Kuan, K. K. W., et al. (2023). "Comparing ART outcomes in women with endometriosis after GnRH agonist versus GnRH antagonist ovarian stimulation: a systematic review." Ther Adv Endocrinol Metab 14: 20420188231173325.

BACKGROUND: Endometriosis is an oestrogen-dependent disease that can cause subfertility in women who may require assisted reproductive technology (ART) to achieve their pregnancy goals. OBJECTIVES: The aim of this study was to compare ART outcomes in women with endometriosis following the long GnRH-agonist controlled ovarian stimulation (COS) protocol with those taking the GnRH-antagonist COS protocol. DATA SOURCES AND METHODS: MEDLINE, Embase and Web of Science were systematically searched in June 2022. Randomized controlled trials (RCTs) and observational studies comparing the long GnRH-agonist COS protocol and the GnRH-antagonist COS protocol in women with all stages/subtypes of endometriosis were included. Data were synthesized into comprehensive tables for systematic review. The Scottish Intercollegiate Guidelines Network (SIGN) checklists were used for the risk of bias assessment of non-randomized studies and randomized studies, and all the included studies were deemed to have acceptable quality. MAIN RESULTS: Eight studies (one RCT and seven observational) with 2695 patients (2761 cycles) were included. Most studies generally reported non-significant differences in clinical pregnancy or live birth rates regardless of the COS protocol used. However, the GnRH-agonist protocol may yield a higher total number of oocytes retrieved, especially mature oocytes. Conversely, the GnRH-antagonist protocol required a shorter COS duration and lower gonadotrophin dose. Adverse outcomes, such as rates of cycle cancellation and miscarriage, were similar between both COS protocols. CONCLUSION: Both the long GnRH-agonist and GnRH-antagonist COS protocols generally yield similar pregnancy outcomes. However, the long GnRH-agonist protocol may be associated with a higher cumulative pregnancy rate due to the higher number of retrieved oocytes available for cryopreservation. The underlying mechanisms of the two COS protocols on the female reproductive tract remain unclear. Clinicians should consider treatment costs, stage/subtype of endometriosis and pregnancy goals of their patients when selecting a GnRH analogue for COS. A well-powered RCT is needed to minimize the risk of bias and compare the risk for ovarian hyperstimulation syndrome. REGISTRATION: This review was prospectively registered at PROSPERO under Registration No. CRD42022327604.

Ren, J., et al. (2014). "Does prolonged pituitary down-regulation with gonadotropin-releasing hormone agonist improve the live-birth rate in in vitro fertilization treatment?" Fertil Steril 102(1): 75–81.

OBJECTIVE: To evaluate the effects of a prolonged duration of gonadotropin-releasing hormone agonist (GnRH-a) in pituitary down-regulation for controlled ovarian hyperstimulation (COH) on the live-birth rate in nonendometriotic women undergoing in vitro fertilization and embryo transfer (IVF-ET). DESIGN: Retrospective cohort study. SETTING: University-affiliated hospital. PATIENT(S): Normogonadotropic women undergoing IVF. INTERVENTION(S): Three hundred seventy-eight patients receiving a prolonged pituitary down-regulation with GnRH-a before ovarian stimulation and 422 patients receiving a GnRH-a long protocol. MAIN OUTCOME MEASURE(S): Live-birth rate per fresh ET. RESULT(S): In comparison with the long protocol, the prolonged down-regulation protocol required a higher total dose of gonadotropins. A lower serum luteinizing hormone (LH) level on the starting day of gonadotropin and the day of human chorionic gonadotropin (hCG) and a fewer number of oocytes and embryos were observed in the prolonged down-regulation protocol. However, the duration of stimulation and number of high-quality embryos were comparable between the two groups. A statistically significantly higher implantation rate (50.27% vs. 39.69%), clinical pregnancy rate (64.02% vs. 56.87%) and live-birth rate per fresh transfer cycle (55.56% vs. 45.73%) were observed in the prolonged protocol. CONCLUSION(S): Prolonged down-regulation in a GnRH-a protocol might increase the live-birth rates in normogonadotropic women.

Song, J., et al. (2020). "Comparison of GnRH-a Prolonged Protocol and Short GnRH-a Long Protocol in Patients with Thin Endometrium for Assisted Reproduction: A Retrospective Cohort Study." Drug Des Devel Ther 14: 3673–3682.
[truncated: 154,605 more chars]
