# Supplementary material
Source: Research Square preprint supplement (doi:10.21203/rs.3.rs-9643518/v1)
Supplement: Supplementary file 2 [file e39004f4494f4e9efb211e7a.docx]

| **Table 1:** Patients' characteristics in different COH protocols before and after PSM | | | | | | |
| --- | --- | --- | --- | --- | --- | --- |
|  | **Unmathched** | | | **Matched** | | |
|  | **Agonist** | **Antagonist** | **p-value** | **Agonist** | **Antagonist** | **p-value** |
| **(N=13378)** | **(N=4193)** | **(N=2609)** | **(N=2609)** |
| **Female_age** |  |  |  |  |  |  |
| Mean(SD) | 31.0(3.99) | 35.2(4.96) | <0.001 | 33.7(4.25) | 33.6(4.75) | 0.175 |
| Median[Q1,Q3] | 31.0[28.0,33.0] | 35.0[31.0,39.0] |  | 34.0[31.0,37.0] | 33.0[30.0,37.0] |  |
| **Parity** |  |  |  |  |  |  |
| Mean(SD) | 0.188(0.391) | 0.334(0.472) | <0.001 | 0.295(0.456) | 0.280(0.449) | 0.233 |
| Median[Q1,Q3] | 0[0,0] | 0[0,1.00] |  | 0[0,1.00] | 0[0,1.00] |  |
| **OPU_order** |  |  |  |  |  |  |
| Mean(SD) | 1.20(0.566) | 1.61(0.998) | <0.001 | 1.49(0.940) | 1.46(0.808) | 0.211 |
| Median[Q1,Q3] | 1.00[1.00,1.00] | 1.00[1.00,2.00] |  | 1.00[1.00,2.00] | 1.00[1.00,2.00] |  |
| **Previous_poor** | 517 (3.9%) | 943 (22.5%) | <0.001 | 366 (14.0%) | 357 (13.7%) | 0.749 |
| **Prevous_hyper** | 24 (0.2%) | 20 (0.5%) | 0.00144 | 7 (0.3%) | 9 (0.3%) | 0.802 |
| **Duration** |  |  |  |  |  |  |
| Mean(SD) | 3.86(2.69) | 4.43(3.55) | <0.001 | 4.27(3.28) | 4.27(3.25) | 0.842 |
| Median[Q1,Q3] | 3.20[2.00,5.00] | 3.40[2.00,6.00] |  | 3.50[2.00,5.80] | 3.50[2.00,5.80] |  |
| **Thyroid** | 626 (4.7%) | 209 (5.0%) | 0.442 | 153 (5.9%) | 146 (5.6%) | 0.721 |
| **PCOS** | 992 (7.4%) | 68 (1.6%) | <0.001 | 93 (3.6%) | 67 (2.6%) | 0.0447 |
| **EMS** | 1288 (9.6%) | 372 (8.9%) | 0.153 | 242 (9.3%) | 259 (9.9%) | 0.452 |
| **menarche** |  |  |  |  |  |  |
| Mean(SD) | 14.2(1.34) | 14.3(1.36) | <0.001 | 14.2(1.38) | 14.3(1.37) | 0.575 |
| Median[Q1,Q3] | 14.0[13.0,15.0] | 14.0[13.0,15.0] |  | 14.0[13.0,15.0] | 14.0[13.0,15.0] |  |
| **Long** | 326 (2.4%) | 117 (2.8%) | 0.223 | 69 (2.6%) | 66 (2.5%) | 0.862 |
| **Short** | 4 (0.0%) | 6 (0.1%) | 0.0209 | 1 (0.0%) | 2 (0.1%) | >0.99 |
| **Heavy** | 179 (1.3%) | 53 (1.3%) | 0.773 | 34 (1.3%) | 31 (1.2%) | 0.803 |
| **Dysmenorrhea** | 13378 (100%) | 4193 (100%) | <0.001 | 2609 (100%) | 2609 (100%) | >0.99 |
| **Polymenorrhea** | 21 (0.2%) | 10 (0.2%) | 0.375 | 5 (0.2%) | 4 (0.2%) | >0.99 |
| **Oligomenorrhea** | 1317 (9.8%) | 164 (3.9%) | <0.001 | 142 (5.4%) | 133 (5.1%) | 0.62 |
| **Amenorrhea** | 54 (0.4%) | 5 (0.1%) | 0.00867 | 5 (0.2%) | 4 (0.2%) | >0.99 |
| **Irregular** | 1139 (8.5%) | 136 (3.2%) | <0.001 | 109 (4.2%) | 94 (3.6%) | 0.316 |
| **BMI** |  |  |  |  |  |  |
| Mean(SD) | 21.1(2.08) | 21.6(2.06) | <0.001 | 21.4(2.03) | 21.4(2.14) | 0.61 |
| Median[Q1,Q3] | 21.2[19.6,22.8] | 21.7[20.1,23.1] |  | 21.6[20.0,23.0] | 21.5[19.9,23.1] |  |
| **bFSH** |  |  |  |  |  |  |
| Mean(SD) | 7.26(2.13) | 9.43(4.10) | <0.001 | 8.44(3.05) | 8.44(3.11) | 0.551 |
| Median[Q1,Q3] | 6.95[5.93,8.23] | 8.45[6.86,10.8] |  | 7.91[6.59,9.55] | 7.81[6.53,9.63] |  |
| **bLH** |  |  |  |  |  |  |
| Mean(SD) | 5.14(3.07) | 4.35(2.50) | <0.001 | 4.44(2.30) | 4.38(2.62) | 0.00608 |
| Median[Q1,Q3] | 4.45[3.35,5.98] | 3.88[2.90,5.16] |  | 4.02[3.04,5.33] | 3.86[2.92,5.14] |  |
| **bPRL** |  |  |  |  |  |  |
| Mean(SD) | 16.2(10.5) | 14.8(8.28) | <0.001 | 15.3(8.41) | 15.4(8.89) | 0.728 |
| Median[Q1,Q3] | 14.3[10.4,19.7] | 13.1[9.36,17.9] |  | 13.4[9.73,18.9] | 13.5[9.91,18.8] |  |
| **bE2** |  |  |  |  |  |  |
| Mean(SD) | 44.1(21.2) | 46.9(23.9) | <0.001 | 45.4(22.0) | 47.5(23.7) | 0.00361 |
| Median[Q1,Q3] | 41.0[30.0,54.0] | 43.0[31.0,58.0] |  | 42.0[31.0,56.0] | 43.0[32.0,59.0] |  |
| **bP** |  |  |  |  |  |  |
| Mean(SD) | 0.815(1.66) | 0.825(1.36) | 0.269 | 0.790(1.31) | 0.789(0.961) | 0.197 |
| Median[Q1,Q3] | 0.610[0.400,0.920] | 0.600[0.390,0.910] |  | 0.590[0.380,0.900] | 0.600[0.390,0.910] |  |
| **bT** |  |  |  |  |  |  |
| Mean(SD) | 0.573(1.63) | 0.522(1.59) | <0.001 | 0.544(1.84) | 0.541(1.81) | 0.561 |
| Median[Q1,Q3] | 0.450[0.330,0.590] | 0.400[0.280,0.550] |  | 0.410[0.290,0.550] | 0.410[0.290,0.560] |  |
| **bAMH** |  |  |  |  |  |  |
| Mean(SD) | 4.06(2.83) | 1.56(1.80) | <0.001 | 2.20(1.76) | 2.02(2.11) | <0.001 |
| Median[Q1,Q3] | 3.31[2.16,5.14] | 1.07[0.640,1.82] |  | 1.75[1.21,2.60] | 1.41[0.883,2.34] |  |
| **AFC** |  |  |  |  |  |  |
| Mean(SD) | 12.1(5.56) | 6.30(4.24) | <0.001 | 7.82(4.10) | 7.66(4.66) | <0.001 |
| Median[Q1,Q3] | 11.0[8.00,15.0] | 5.00[4.00,8.00] |  | 7.00[5.00,9.00] | 7.00[5.00,10.0] |  |
| ***Note:*** PCOS, polycystic ovary syndrome; BMI, body mass index; EMS, endometriosis; E2, estradiol， FSH, follicle stimulation hormone; LH, luteinizing hormone; PRL, prolactin; P, progestone; T, testosterone; AMH, anti-Müllerian hormone；AFC, antral follicle count; | | | | | | |
|
|
|

| **Table 2** Clinical results in different COH protocols before and after PS-matching | | | | | | |
| --- | --- | --- | --- | --- | --- | --- |
|  | **Unmatched** | | | **Matched** | | |
|  | **Agonist** | **Antagonist** | **p-value** | **Agonist** | **Antagonist** | **p-value** |
| **(N=13378)** | **(N=4193)** | **(N=2609)** | **(N=2609)** |
| **oocyte** |  |  |  |  |  |  |
| Mean(SD) | 9.89(5.59) | 4.55(4.00) | <0.001 | 7.08(4.45) | 5.59(4.49) | <0.001 |
| Median[Q1,Q3] | 9.00[6.00,13.0] | 4.00[2.00,6.00] |  | 6.00[4.00,10.0] | 4.00[3.00,7.00] |  |
| **Mature** |  |  |  |  |  |  |
| Mean(SD) | 8.68(5.10) | 3.99(3.50) | <0.001 | 6.25(4.03) | 4.88(3.92) | <0.001 |
| Median[Q1,Q3] | 8.00[5.00,12.0] | 3.00[2.00,5.00] |  | 6.00[3.00,9.00] | 4.00[2.00,6.00] |  |
| **Mature_rate** |  |  |  |  |  |  |
| Mean(SD) | 86.7(18.5) | 83.7(29.0) | <0.001 | 86.5(21.4) | 84.8(25.9) | 0.0907 |
| Median[Q1,Q3] | 91.7[80.0,100] | 100[78.9,100] |  | 100[80.0,100] | 100[80.0,100] |  |
| **PN2** |  |  |  |  |  |  |
| Mean(SD) | 6.26(4.01) | 2.90(2.75) | <0.001 | 4.52(3.21) | 3.52(3.08) | <0.001 |
| Median[Q1,Q3] | 6.00[3.00,8.75] | 2.00[1.00,4.00] |  | 4.00[2.00,6.00] | 3.00[1.00,5.00] |  |
| **PN2_rate** |  |  |  |  |  |  |
| Mean(SD) | 62.8(23.0) | 60.6(33.6) | 0.239 | 62.6(26.5) | 61.5(30.7) | 0.998 |
| Median[Q1,Q3] | 66.7[50.0,78.6] | 66.7[40.0,100] |  | 66.7[50.0,80.0] | 66.7[47.6,84.6] |  |
| **PN2_cleavage** |  |  |  |  |  |  |
| Mean(SD) | 6.15(3.96) | 2.83(2.68) | <0.001 | 4.44(3.18) | 3.43(3.01) | <0.001 |
| Median[Q1,Q3] | 6.00[3.00,8.00] | 2.00[1.00,4.00] |  | 4.00[2.00,6.00] | 3.00[1.00,5.00] |  |
| **PN2_cleavage_rate** |  |  |  |  |  |  |
| Mean(SD) | 94.6(19.5) | 83.3(36.0) | <0.001 | 91.9(25.1) | 87.0(31.8) | <0.001 |
| Median[Q1,Q3] | 100[100,100] | 100[100,100] |  | 100[100,100] | 100[100,100] |  |
| **EMT** |  |  |  | **EMT** |  |  |
| Mean(SD) | 11.4(2.51) | 10.1(2.34) | <0.001 | 11.2(2.62) | 10.2(2.34) | <0.001 |
| Median[Q1,Q3] | 11.2[9.70,13.0] | 9.90[8.50,11.6] |  | 11.0[9.50,12.7] | 10.1[8.60,11.7] |  |
| Missing | 178 (1.3%) | 181 (4.3%) |  | 51 (1.9%) | 86 (3.3%) |  |
| **GQE** |  |  |  | **GQE** |  |  |
| Mean(SD) | 3.87(2.98) | 1.81(1.93) | <0.001 | 2.82(2.44) | 2.16(2.18) | <0.001 |
| Median[Q1,Q3] | 3.00[2.00,5.00] | 1.00[1.00,3.00] |  | 2.00[1.00,4.00] | 2.00[1.00,3.00] |  |
| **GQE_rate** |  |  |  | **GQE_rate** |  |  |
| Mean(SD) | 59.3(29.8) | 54.1(39.1) | <0.001 | 58.2(33.5) | 55.7(37.0) | 0.0633 |
| Median[Q1,Q3] | 63.6[40.0,80.0] | 50.0[0,100] |  | 63.6[33.3,85.7] | 57.1[25.0,100] |  |
| Missing | 132 (1.0%) | 157 (3.7%) |  | 45 (1.7%) | 81 (3.1%) |  |
| **Cancel_for_hyper** | 2709 (20.2%) | 140 (3.3%) | <0.001 | 200 (7.7%) | 137 (5.3%) | <0.001 |
| **OHSS** | 275 (2.1%) | 6 (0.1%) | <0.001 | 25 (1.0%) | 6 (0.2%) | 0.00118 |
| **cLB** | 9791 (73.2%) | 1502 (35.8%) | <0.001 | 1517 (58.1%) | 1112 (42.6%) | <0.001 |
| ***Note:*** PN2, 2 pronucleus; OHSS, ovarian hyperstimulation syndrome; EMT, endometrium thickness; GQE, good quality embryo; cLB, cumulative live birth. | | | | | | |
